# Supplementary material for: Prediction of ACL injury incidence and analysis of key features in basketball players based on multi-algorithm models
Source: PeerJ. 2025 Oct 14;13:e20141. doi: 10.7717/peerj.20141 (PMC12533536; doi:10.7717/peerj.20141)
Supplement: Supplemental Information 4 [file peerj-13-20141-s004.xlsx]

## Sheet: Sheet1
RelativeDeadLift	Squat Jump	Injury History YES=1,NO=6	Weekly Basketball Hours	YBT - Right Leg Combined Score	YBT - Left Leg Combined Score	Injury Label
1.63333	51	1	3	0.860425531914894	0.860426	1
1.19412	54	1	3	0.910099	0.730396	1
1.71875	45	6	3	0.909677419354839	0.858065	0
1.68571	45	1	3	0.747955	0.730909	1
1.57143	54	6	3	0.972414	0.982759	0
1.98529	45	6	3	1.01935	0.948387	0
1.05505	53	1	3	0.932349	0.72459	0
2.05658	53	6	3	0.868966	0.875862	0
1.34737	34	1	3	0.807609	0.916304	1
1.25019	40	6	3	0.873913	0.886957	0
1.76471	50	6	3	0.873913	0.886957	0
1.13711	45	6	3	0.658454	0.725567	1
1.625	58	6	3	0.990476	0.993528	0
1.14286	71	1	3	0.915888	1.0679	0
1.21622	59	1	3	1.08333	1.05333	0
1.4	52	6	3	0.845946	0.834921	1
1.64557	63	6	3	1.03922	0.921212	0
1.86813	65	6	3	1.01529	0.925926	0
1.32157	46	1	3	0.717469	0.823853	1
1.88235	59	1	3	0.932349	1.07216	0
1.51163	64	6	3	0.932349	1.05882	0
1.33333	50	1	3	0.901587	0.971429	0
1.71053	62	6	3	0.892966	1.1413	0
1.91176	64	1	3	0.988636	1.28352	0
1.625	59	6	3	0.853333	1.11927	0
1.49425	57	6	3	1.0386	0.812121	0
1.88235	63	6	3	1.16667	1.11111	0
1.5	63	1	3	0.864198	1.04321	0
1.45161	53	6	3	0.878505	0.923547	0
1.52381	56	6	3	0.883333	0.884735	0
1.66667	58	6	3	1.14458	0.893333	0
1.73913	66	6	3	0.932349	1.05655	0
1.61458	62	1	3	1.13262	1.0098	0
1.18182	55	6	3	0.977346	0.936937	0
1.06279	53	1	3	0.701905	0.832274	1
1.38462	62	6	3	0.942424	1.01894	0
1.66667	62	6	3	0.821212	0.780702	0
1.50538	62	1	3	0.766082	1.06542	0
1.47727	59	6	3	0.977346	0.858974	0
1.68421	63	1	3	0.942308	0.878505	0
1.39535	59	1	3	0.688474	0.788462	0
1.66667	59	6	3	0.814103	0.914894	0
1.15385	35	6	3	1.01064	0.838596	0
1.53846	54	1	3	0.901099	1.19149	0
1.26437	52	1	3	0.85461	0.841121	0
0.81954	30	1	3	0.928674	0.914301	1
1.6	40	6	3	1.00825	1.02786	0
1.36364	41	1	3	0.925802	0.880132	0
1.19318	50	6	3	1.02291	0.796973	0
1.08696	53	1	3	0.776185	0.888912	0
1.20879	56	6	3	0.972632	0.985263	0
1.16883	54	6	3	0.804396	0.774725	0
1.8	51	6	3	0.804721	0.811159	0
1.53333	49	6	2	1.02632	0.950526	0
1.4	50	6	2	0.796667	0.77	0
1.28571	56	1	2	0.82069	0.848276	0
1.6	31	6	2	0.747644	0.73822	0
1.54412	36	6	2	0.92	0.886667	0
1.25	41	6	2	0.890625	0.9125	0
1.48649	50	6	2	0.9	0.856098	0
1.79951	56	6	2	0.819429	0.826286	0
1.52778	50	6	2	0.943316	0.924064	0
1.75439	44	6	2	0.918033	0.937705	0
1.47887	36	1	2	0.835714	0.819643	0
1.15	52	6	2	0.994565	1.02065	0
1.5493	39	1	2	0.988235	0.888235	0
1.25	32	6	2	0.876923	0.840659	0
1.48438	37	6	2	0.941935	0.906452	0
1.58537	53	1	2	1.10877	0.938003	0
1.5493	53	1	2	0.950402	0.842483	0
1.5	45	1	2	0.790533	0.954287	0
1.5	37	6	2	0.867326	0.76228	0
1.31176	55	6	2	0.844571	0.920571	1
1.54122	44	6	2	0.811364	0.821591	0
1.44578	57	1	2	0.860759	0.829114	0
1.71875	47	6	2	0.94186	0.872093	0
1.16506	43	6	2	0.851333	0.856667	1
1.23596	54	1	2	0.914917	0.934807	0
1.68266	43	6	2	0.782927	0.826829	0
1.40845	56	1	2	0.958659	0.757542	0
1.82927	61	6	2	1.03831	0.92	0
2.06349	72	6	2	0.857605	1.18876	0
1.94444	67	6	2	0.887879	0.938003	0
1.88235	67	6	2	1.03595	0.886731	0
1.54122	72	6	2	1.15	1.03065	0
1.9697	51	1	2	0.88	1.01053	0
1.6	59	6	2	0.985119	0.938003	0
1.5	59	6	2	1.05556	1.07368	0
1.52381	52	1	2	0.945455	0.72619	0
1.47368	61	6	2	1	0.666667	0
1.70213	65	1	2	0.868502	0.964401	0
1.66667	61	1	2	1.0098	1.11765	0
2.23881	64	6	2	0.996764	1.11667	0
1.45833	53	1	2	1.01718	0.887879	0
1.33333	60	6	2	1.04673	0.815534	0
1.52542	52	1	2	0.964539	0.932624	0
1.51786	50	1	2	0.891228070175439	1.24521	0
1.31868	41	6	2	1.08045977011494	1.14626	0
1.33333	36	6	2	0.945578231292517	1.04762	0
2.1	42	6	2	0.875389408099688	0.9875	0
1.38462	47	6	2	0.9625	1.13043	0
1.03093	40	6	2	1.13405797101449	0.926984	0
1.3253	56	1	2	1.15408073394496	1.0525	0
1.93548	53	6	2	1.09027426455083	0.99431	0
			3：＞15hours 2：≤15hours
