# Supplementary material for: Prediction of ACL injury incidence and analysis of key features in basketball players based on multi-algorithm models
Source: PeerJ. 2025 Oct 14;13:e20141. doi: 10.7717/peerj.20141 (PMC12533536; doi:10.7717/peerj.20141)
Supplement: Supplemental Information 5 [file peerj-13-20141-s005.xlsx]

## Sheet: Sheet1
ES-FP4(y)	ES-R-COP DISTANCE（X）	ES-L- ankle angle（X）	ES-L- hip angle（Y）	ES-L- hip moment（X）	ES-L- knee angle（X）	ES-L- knee angle（Z）	ES-L- knee moment（X）	ES-L- knee moment（Z）	ES_R_SHARK_ANGLE（Y）	ES-R-ankle angle（X）	ES-R- ankle angle（Y）	ES-R- hip angle（Z）	ES-R- knee angle（X）	Activation level of the rectus femoris	Activation level of vastus lateralis	Activation level of biceps femoris short head	Injury Label
222.642	0.00432	2.61245	23.4308	-0.087214	-63.97471	-19.225077	-0.182203	-0.06287	15.9803	17.8212	-49.1	4.34846	-54.84817	0.426691	0.478561	0.435611	1
272.879	0.023504	1.55135	24.8855	-5.38715	-56.79723	-23.334686	-2.1648	-0.0759926	14.2024	-21.2265	-45.6879	5.92174	-56.2887	0.305034	0.53152	0.303735	1
63.3554	0.028001	-10.2247	25.1005	-9.2856	-53.36632	-23.094059	-1.03418	-0.032163	11.3972	17.8212	-61.3144	9.35395	-51.097	0.534056	0.180659	0.163739	1
406.784	0.034689	18.3939	21.6257	-0.028971	-64.19842	-13.3396	-0.175041	0.004863	23.8465	17.8212	42.6691	0.355028	-54.7319	0.58528	0.249205	0.608595	1
345.754	0.072445	-10.7937	26.6699	-0.018629	-58.60857	-21.4171	-0.218937	-0.058897	4.03542	-13.9286	-44.08	10.4272	-61.4327	0.524975	0.332753	0.258029	1
451.131	0.090447	5.98605	25.168	-0.37012	-55.42938	-19.89842	-0.237901	-0.048338	-0.440923	9.38812	-24.6299	15.5685	-67.6781	0.368707	0.210479	0.107455	1
287.481	0.030981	3.28774	19.439	-0.10932	-64.61811	-0.765018	-0.172612	0.000282	4.1871	25.9375	-37.4516	8.89255	-59.5173	0.012497	0.067411	0.064601	0
12.7881	0.028039	8.815687	20.302	-1.45466	-78.08921	-2.25677	-0.766358	-0.335563	3.6489	27.8676	-33.2327	6.87164	-60.3483	0.56686	0.273104	0.164219	0
0.053262	0.0275595	12.9055	23.519791	-0.125269	-75.27822	10.4764	-0.144322	-0.010236	8.58511	33.1705	-33.8066	7.16522	-62.2802	0.236028	0.848439	0.733866	0
301.418	0.02708	-5.03226	20.134	-7.75392	-58.05588	3.33296	-3.29347	-0.0759926	-1.0375	20.1624	-26.3714	11.1345	-60.1811	0.619627	0.185275	0.09052	0
362.66	0.062267	13.5792	18.9335	-8.68451	-70.02294	-20.1044	-3.94081	-0.0759926	-11.1164	31.2263	-19.9354	15.3814	-77.2953	0.313049	0.242326	0.079904	0
319.437	0.04897	-0.68945	22.202	-5.81695	-74.96599	-9.66528	-2.1225	-0.0759926	-3.01309	30.87	-30.4041	12.4919	-77.3641	0.237621	0.301734	0.024876	0
179.254	0.032008	3.79733	28.7413	-5.597951	-58.83175	8.343924	-2.70466	-0.0759926	12.7954	7.17837	-54.444	-1.67633	-53.2385	0.001092	0.348969	0.747291	0
72.0321	0.032538	-6.09915	18.8984	-0.093645	-47.52270	5.49865	-0.232326	-0.085439	1.74091	30.3043	-60.8395	1.28909	-60.888	0.028858	0.074123	0.006463	0
38.8703	0.036942	7.35416	21.9233	-0.313007	-54.65680	4.72902	-0.334336	-0.12731	3.25038	20.607	-52.7446	-0.090147	-54.0486	0.001092	0.081229	0.005771	0
274.373	0.026544	23.8895	32.2509	-6.52358	-79.80947	4.72231	-2.78911	-0.0759926	3.76344	30.6811	-47.2982	1.92145	-76.5309	0.001703	0.187132	0.007203	0
115.856	0.033687	12.6952	26.8298	-3.33846	-65.73584	6.47128	-1.62867	-0.0759926	5.10168	25.5778	-47.6086	-0.329152	-68.0823	0.001617	0.247542	0.121617	0
16.5009	0.058155	55.3254	34.8376	0.371255	-71.84529	0.083801	-0.042274	0.080998	-2.58102	38.097	-37.9352	6.47617	-82.0536	0.001703	0.097467	0.754086	0
191.411	0.0603505	5.03086	15.6874	-0.383917	-66.58470	-31.7193	-0.149058	-0.077447	-2.2483	30.8185	-62.5197	16.6572	-68.8059	6.7e-05	0.348969	0.849638	0
278.69	0.054337	11.1923	14.5071	0.619402	-95.02015	-34.426	-0.033146	0.065167	14.6759	17.8212	61.7192	1.6379	-65.0071	0.004202	0.348969	0.73742	0
135.829	0.0603505	6.15131	10.741	0.302791	-77.02936	-23.4419	-0.007086	0.068804	10.3332	19.4691	-18.6111	-0.299944	-57.3389	0.011561	0.348969	0.293277	0
299.282	0.0603505	11.132	10.7657	0.110146	-84.22550	-34.7633	-0.06474	-0.012818	12.1228	27.3244	-16.4467	3.36653	-61.2762	7.4e-05	0.381091	0.606784	0
272.062	0.014267	10.1103	14.7208	0.241364	-87.08168	-44.8305	-0.05473	0.006749	-2.34906	17.8212	-35.7232	13.9611	-79.327	0.001617	0.316693	0.889973	0
32.7291	0.0603505	-0.179846	14.2425	-3.17613	-39.30722	-13.9896	-0.400348	-0.298485	-11.5401	49.2437	-44.8432	14.3721	-66.406	0.03636	0.106761	0.100589	0
111.11	0.054998	-1.11806	26.2173	0.197945	-41.79819	-3.90352	-0.118949	-0.054005	7.54981	-3.21326	10.9756	9.81535	-39.3975	0.322474	0.071823	0.448996	1
242.57	0.041586	-7.03884	24.0342	-7.96599	-44.25191	-18.9965	-3.467497	-0.0759926	3.22819	3.96179	3.30386	9.87282	-51.9335	0.964373	0.029715	0.100624	1
-77.1609	0.025787	7.70348	22.3769	-1.54624	-62.70184	-46.2056	-0.912115	-0.311768	19.6202	18.9802	4.75866	6.07795	-40.6995	0.070235	0.07592	0.254153	1
521.313	0.045317	2.55869	28.1573	-8.3303	-63.31672	-33.1161	-2.50993	-0.344102	8.42379	16.7089	9.18066	13.8569	-69.7597	0.499306	0.204707	0.249552	1
-11.5379	0.041039	7.72761	24.4741	-1.08105	-86.64123	-34.1412	-0.430223	-0.191813	20.0605	20.7182	15.8534	11.1549	-61.4098	0.950394	0.108531	0.117021	1
253.385	0.054011	-2.19616	22.7913	-8.80988	-42.30255	-32.6258	-3.72051	-0.0759926	4.51897	11.4029	-2.19167	10.6691	-53.3731	0.042741	0.242182	0.181342	1
96.8844	0.07437	-10.0921	17.7931	-6.36048	-64.62360	-1.58115	0.744377	0.012938	2.33792	17.8212	-0.526285	5.86653	-60.4107	0.001166	0.13422	0.060468	0
86.0322	0.063326	31.8408	16.3873	-0.140352	-61.88439	-47.2719	-0.164555	0.06284	7.58192	17.8212	12.1515	5.76902	-56.3248	6.3e-05	0.140645	0.795099	0
200.247	0.076781	-4.07217	22.303	-0.239306	-64.62360	-25.054	0.008782	-0.022203	-9.06218	17.8212	-50.7239	11.9384	-64.6297	0.00027	0.042181	0.105496	0
150.818	0.077106	24.238	16.6726	-0.313882	-51.09837	-30.4507	-0.224318	0.051454	7.27495	17.8212	-2.20718	6.72601	-61.6003	0.001617	0.643826	0.781024	0
64.1579	0.102747	-26.8856	19.1328	0.193753	-33.24749	-8.46466	-0.158262	-0.1029	-6.25824	17.8212	-37.9158	11.0287	-63.8924	0.001388	0.063904	0.011596	0
245.014	0.102785	-11.3787	17.7387	-0.060641	-64.62360	-3.9104	0.116734	-0.040966	-7.54937	17.8212	-30.7684	5.87178	-50.8344	0.011562	0.373725	0.167504	0
444.951	0.048673	13.3422	21.988	-5.79468	-79.60765	-17.19	-1.43747	-0.0759926	-0.319073	18.8905	-23.3913	6.68131	-77.2314	0.272282	0.151899	0.13236	0
208.194	0.043142	13.3422	21.7335	-4.09845	-85.07001	-17.19	-1.90947	-0.373304	6.0576	11.516407	-16.5262	2.87242	-80.7682	0.293168	0.223505	0.120963	0
153.163	0.058549	29.6972	25.7238	-0.092033	-72.12798	-48.089	-0.275525	-0.17934	4.1548	12.1088	-13.9619	0.843624	-71.9999	0.242413	0.272607	0.122598	0
284.32	0.044375	32.2061	22.5448	-5.42544	-63.84236	-61.2979	-2.69866	0.208596	10.7667	-15.05094	-7.11356	-0.003769	-49.9905	0.688901	0.162693	0.569187	0
309.175	0.072504	13.3422	20.0776	-6.06669	-60.08081	-17.19	-2.78714	-0.5645	-3.59381	17.8255	-21.1298	6.81184	-62.9336	0.870162	0.629512	0.030499	0
327.431	0.088671	-11.6676	21.2373	-5.14568	-73.02284	-17.19	-2.19405	-0.0759926	-8.26965	29.9915	-29.5586	8.40461	-78.7282	0.275478	0.265754	0.040524	0
101.455	0.034239	24.3392	12.6483	-0.070992	-75.10981	-15.5479	-0.081413	-0.005558	16.5188	13.8917	12.337	-3.74419	-59.59	0.598745	0.049978	0.026842	0
37.9286	0.046773	23.409	21.0934	-3.01411	-73.52218	-6.65399	-0.982553	-0.585351	12.438317	12.849953	11.8661	-0.648046	-64.3573	0.960821	0.15539	0.155093	0
85.6903	0.027543	8.49779	13.9616	0.036232	-47.17515	-43.9234	-0.136382	0.005796	-0.554472	3.57922	-0.207978	6.68804	-62.1529	0.215574	0.065002	0.051363	0
55.3486	0.043319	23.985	14.7807	-3.01302	-65.17941	-14.1361	-0.865552	-0.399987	15.6223	9.8748	6.95146	-3.93714	-49.9039	0.638033	0.021695	0.009113	0
131.713	0.054022	19.0704	16.9588	0.007434	-71.42565	-24.6732	-0.076761	-0.005292	3.56117	17.12	0.019282	4.09441	-77.8953	0.768758	0.108682	0.122529	0
67.7963	0.046146	3.15776	20.0349	-0.307732	-27.12413	-56.4833	-0.135431	-0.001525	1.852	-3.87477	-5.43483	7.64189	-58.4468	0.769972	0.014422	0.019794	0
311.733	0.036141	-2.78774	29.4381	-8.5239	-56.70650	-11.6261	-4.14885	-0.0759926	16.1131	-2.86681	2.53853	-0.498423	-48.7604	0.132904	0.164066	0.419396	1
304.61	0.043954	-1.85938	36.1735	-7.69925	-62.55440	-20.0318	-3.2394	-0.0759926	11.8015	5.03876	-0.656479	2.26288	-57.1347	0.19702	0.115757	0.228436	1
130.013	0.056945	-5.93026	35.5363	-5.56167	-52.05985	-13.1998	-2.49564	-0.0759926	5.58266	3.89589	-2.08765	4.52079	-51.7478	0.117735	0.194573	0.070872	1
441.211	0.076721	-4.16697	33.0033	-9.80364	-68.00854	-30.0558	-3.8145	-0.0759926	-2.22684	16.3081	2.82809	9.23143	-77.679	0.753947	0.528364	0.121947	1
9.03615	0.054153	-10.5605	26.8551	0.436477	-25.24929	-3.02169	-0.315192	-0.116637	-4.79554	0.61231	-1.50287	8.44393	-49.1826	0.101468	0.115134	0.098524	1
553.486	0.0603505	-5.67131	20.268	-0.273646	-40.07755	-31.3803	-0.076538	-0.008157	-4.32432	10.3957	-8.01204	10.5791	-61.4968	0.230693	0.225137	0.986192	1
213.864	0.068776	57.6865	15.9639	-4.91786	-19.34978	-46.4648	0.078393	0.17678	14.3903	-7.73647	-60.5084	2.27432	-76.0026	0.555	0.745795	0.738405	0
296.439	0.04017	19.4922	14.5297	-4.02587	-82.46754	-20.7531	-0.545832	-0.282511	17.419	17.8212	-36.0427	-2.41514	-69.7602	0.064501	0.021712	0.625593	0
100.203	0.041187	14.7001	15.9085	-0.117099	-66.31215	-20.7381	-0.012432	0.074164	15.828	17.8212	-53.9716	-5.10948	-51.2425	0.296716	0.140648	0.827054	0
405.208	0.03517	8.36388	11.0179	-5.46509	-75.08221	-39.0164	-0.483232	-0.314824	13.5846	17.8212	-65.77	-3.4774	-71.2708	0.757093	0.543511	0.604836	0
135.333	0.076175	-0.81467	10.0947	-3.77771	-56.40982	-15.8206	0.645912	-0.0759926	16.352	-6.9058	-61.753	4.04866	-87.0306	0.132835	0.027166	0.05624	0
233.633	0.061321	4.03101	8.06924	-5.73674	-74.88892	-38.0616	-0.3275	-0.0759926	16.0015	-0.040123	-53.5695	4.56222	-91.5304	0.088735	0.024314	0.113163	0
139.42	0.049989	27.4678	23.8204	0.051669	-76.97541	12.7457	-0.046544	0.058051	20.7305	32.8711	41.0388	22.1515	-59.8953	0.141365	0.101863	0.066591	0
224.545	0.057934	-15.9134	20.5923	-5.42032	-63.04728	-17.19	-1.2465	-0.0759926	18.7864	24.9911	45.1587	20.1986	-56.0346	0.204504	0.082239	0.037133	0
302.711	0.058242	29.0821	11.1209	-3.02956	-67.46764	-12.3942	-1.03418	-0.0759926	10.3922	31.1664	33.9647	20.9474	-80.9849	0.059475	0.167355	0.104633	0
337.351	0.057011	13.3422	19.7783	-0.159674	-47.33751	-17.19	-0.066228	-0.024193	3.78562	23.4924	31.4127	21.1081	-71.92	-0.003244	0.348969	0.070983	0
425.493	0.062027	13.3422	19.1465	-3.02956	-55.02968	-17.19	-1.03418	-0.0759926	2.76308	23.1379	31.7221	22.3228	-68.312	0.04327	0.171197	0.059032	0
43.0502	0.056397	13.3422	22.8021	-0.213611	-68.25932	-17.19	-0.119149	-0.071042	19.0503	29.4736	43.7578	22.4822	-67.6297	0.590237	0.109614	0.081611	0
182.332	0.051767	18.7953	27.0092	-2.13661	-72.49971	-14.6903	-0.003171	-0.0759926	-2.54179	15.9966	9.91052	-3.56515	-61.2482	0.009305	0.033633	0.025801	0
411.875	0.065376	13.3422	14.5415	-8.86058	-64.62360	7.67896	-1.12617	-0.0759926	-6.44398	7.757	6.12267	-0.372961	-65.1249	0.023845	0.060502	0.009347	0
70.8272	0.046679	13.9528	21.8421	0.616651	-72.11436	-32.3678	0.049406	0.122934	-0.953923	12.4014	8.76397	-5.3253	-58.9084	0.077213	0.033447	0.021114	0
0.007987	0.051866	19.5791	33.0886	0.769238	-68.10415	-20.5194	-0.178637	0.014541	2.2292	9.14882	5.16833	-3.62874	-58.8677	0.038857	0.044855	0.019511	0
171.534	0.0603505	-10.6295	15.583	-0.253414	-29.62027	-37.6687	-0.038663	-0.000374	-16.1187	15.2391	4.07378	2.47887	-81.0955	0.001177	0.021644	0.018953	0
81.8775	0.071551	-20.2348	13.6852	-0.205257	-64.62360	-23.566	-0.012809	0.012709	-14.9436	10.6734	6.23435	0.274068	-66.6948	0.024584	0.04767	0.020903	0
212.057	0.047889	20.508	16.7984	-3.39107	-94.43498	-16.9981	-0.996315	-0.452691	-9.3007	29.9815	10.62	0.101441	-74.1488	0.227718	0.127625	0.279196	0
487.556	0.035425	0.994414	20.4749	-10.6679	-55.76254	-29.6404	-1.80007	-0.0759926	-16.7848	25.5098	6.69678	2.9293	-75.1329	0.465814	0.253373	0.665171	0
211.665	0.023978	23.6282	12.503	-3.64728	-100.9780	-29.1436	-0.174799	-0.355809	-5.03464	28.5149	10.34	-1.41415	-79.3673	0.391034	0.060637	0.470837	0
228.255	0.04777	16.5136	13.2919	-2.67012	-97.50031	-25.2704	-0.656742	-0.357164	-12.5706	36.3378	17.3234	-4.16164	-78.126	0.465995	0.110461	0.825539	0
104.28	0.030635	25.0636	11.1653	-3.17809	-90.03270	-27.2451	-0.938128	-0.335557	-12.4634	34.9175	20.8433	-4.58423	-64.4926	0.192113	0.48075	0.369247	0
102.463	0.041053	23.044	15.3282	-0.09998	-98.52316	-21.9096	-0.205282	-0.013311	-13.1117	34.181	19.4143	-5.30863	-82.7613	0.149155	0.339324	0.793118	0
25.2812	0.058474	10.7117	15.8403	-0.043718	-73.47236	-8.02625	-0.123967	-0.036847	8.87529	6.53519	2.22401	4.1054	-67.6203	0.151825	0.070774	0.014102	0
58.7263	0.053558	8.61251	18.3375	-4.35727	-72.13695	-9.59337	-2.02799	-0.239832	8.90604	4.71499	1.60625	1.89648	-66.5412	0.734886	0.10498	0.012412	0
10.4222	0.067485	16.3028	27.3322	-0.093388	-81.73047	6.85355	-0.203542	-0.049122	12.3923	13.7817	14.1343	1.28182	-68.0775	0.627112	0.433779	0.873942	0
67.9383	0.057149	6.64527	16.1452	-0.274976	-80.17739	-9.44976	-0.268872	-0.050914	12.5715	3.96796	6.94265	1.80118	-69.7475	0.846743	0.146879	0.019584	0
129.755	0.076027	13.864	15.2011	-2.81254	-77.78103	-13.0935	-0.875189	0.297617	9.27893	8.22814	-0.834419	2.92243	-69.066	0.350743	0.022132	0.056275	0
-0.723801	0.041862	3.0157	17.1117	-2.19142	-62.60261	-24.1229	-1.32531	0.251887	-2.98429	17.9275	-2.85012	12.4772	-59.8236	0.564884	0.256369	0.999844	0
186.104	0.043994	40.2828	29.4679	-3.82309	-55.46717	-17.19	-1.43295	-0.0759926	2.11729	17.8212	-63.3131	16.3442	-57.9639	0.196603	0.109213	0.070213	1
85.8102	0.096603	57.6452	37.7914	0.782791	-51.69445	-17.19	0.026325	0.060742	-16.2244	55.8513	-55.0153	6.80516	-66.6735	0.152589	0.840273	0.235032	1
313.059	0.038278	58.5423	32.5535	-5.06032	-67.75363	-17.19	-1.51602	-0.0759926	-4.61444	17.8212	-64.4862	29.3635	-70.2768	0.528447	0.197363	0.048972	1
101.874	0.032061	44.9382	26.5231	-4.50717	-53.17884	-17.19	-1.60747	-0.0759926	4.97202	17.8212	-67.2044	14.5452	-58.8133	0.205112	0.206566	0.037767	1
191.085	0.035698	48.1288	20.2346	-4.3228	-50.12651	-17.19	-1.84692	-0.393999	0.582565	17.8212	-64.0834	15.3037	-58.1971	0.007365	0.017513	0.027063	1
357.418	0.048091	57.8817	32.4708	-8.08567	-55.70654	-17.19	-3.32589	-0.0759926	-10.2158	17.8212	-55.589	26.534	-72.5817	0.134437	0.351982	0.067431	1
289.851	0.065871	4.85562	23.4555	-7.04889	-60.15825	-8.59973	-3.51868	-0.299339	4.12572	3.48241	12.4402	11.7946	-55.4235	0.07836	0.422632	0.576329	0
-12.3368	0.076487	11.2862	16.8555	-0.997588	-71.96432	-4.65559	-0.504503	-0.026746	11.0971	15.5256	4.24742	8.56872	-64.3319	0.034455	0.1351	0.042217	0
51.4157	0.072219	-4.26808	17.779	-1.31945	-55.98655	-15.8699	-0.900789	-0.160714	11.0857	-1.90035	8.97208	5.66347	-54.9809	0.020311	0.219365	0.05468	0
358.068	0.064615	-3.59549	24.3878	0.806469	-59.89900	-5.73064	0.004703	0.198604	3.21106	0.610851	5.60571	9.50882	-51.6133	0.297418	0.423694	0.132401	0
246.917	0.082386	5.07134	22.1166	0.14178	-67.55997	-3.937	-0.049333	-0.057576	5.24999	10.6357	0.447552	12.9739	-69.8198	0.034454	0.217348	0.272948	0
375.584	0.062598	3.39243	16.962	-6.73627	-61.42075	-18.4647	-3.695	-0.0759926	7.63213	12.4763	-0.561012	11.9417	-68.5382	0.038344	0.320382	0.146009	0
289.068	0.049657	46.0177	23.934	-7.14226	-61.76401	-17.19	-1.36391	-0.125975	-5.8549	35.8154	-31.7404	19.4606	-75.9	0.641816	0.170157	0.008171	0
40.2606	0.052158	13.3422	28.5612	0.403574	-64.95032	-17.19	0.014945	0.042505	11.8438	27.0674	-11.5813	5.63458	-62.3857	0.705059	0.704244	0.022396	0
515.493	0.037887	27.8806	25.2389	-0.437425	-48.75330	-62.2954	-0.147062	0.043954	-6.25631	26.1603	-24.4596	10.3251	-68.6454	0.028162	0.134087	0.042428	0
61.6652	0.059293	15.8875	24.527	-0.500514	-77.42603	-36.3805	-0.252409	-0.047982	18.068	20.858	-9.33494	2.49124	-52.6502	0.286286	0.042102	0.021028	0
73.722	0.08262	13.3422	33.8801	-2.70842	-54.53298	-17.19	1.85071	-0.0759926	-10.1067	35.3119	-18.3802	17.6132	-77.2273	0.059521	0.253242	0.004475	0
125.474	0.052216	7.6033	23.5875	-1.99881	-88.61298	-48.5325	-0.639062	-0.242746	8.22713	20.6107	-6.6128	3.35336	-68.3903	0.371052	0.310587	0.004042	0
-25.181	0.076105	13.3422	28.1393	0.154062	-40.27875	-17.19	-0.111709	-0.069826	14.7954	12.9448	27.3576	2.21721	-41.6329	0.034455	0.716546	0.460065	1
301.625	0.060414	13.3422	17.835	-0.511455	-33.33462	-17.19	-0.175517	-0.100519	4.78802	10.4856	23.2474	14.1091	-51.9484	0.007345	0.080509	0.035457	1
6.49803	0.09496	-4.39685	22.32	-0.248864	-36.93804	-24.0284	-0.083154	-0.0091	9.74881	-0.6065	11.6716	2.62031	-27.7442	0.01676	0.065848	0.580158	1
477.113	0.059022	13.3422	25.2295	-11.8119	-10.76312	35.7386	-0.781361	-0.0759926	0.251209	6.64104	21.2921	17.5823	-54.6831	0.038344	0.215417	0.615271	1
139.537	0.073034	4.11857	23.091	-0.033112	-55.52238	22.6577	-0.091803	-0.012818	14.8769	15.9196	39.5397	5.5777	-55.5265	0.002142	0.18151	0.075287	1
95.7772	0.059015	13.3422	18.3909	-7.17824	-28.04782	-17.19	-1.39455	-0.102808	0.495444	8.42853	24.8362	16.5618	-52.1358	0.016759	0.081378	0.030297	1
336.559	0.042722	13.3422	20.1247	-6.83476	-35.55867	-17.19	-2.62628	-0.0759926	5.8384	22.9426	-41.8152	18.1102	-41.4146	0.22095	0.178203	0.509517	0
118.774	0.070931	16.7001	26.2927	-3.15948	-62.08442	-17.19	-0.987769	-0.473677	8.04681	17.7311	-9.77941	7.29666	-62.4016	0.123188	0.041181	0.425003	0
29.076	0.06381	15.0791	28.2806	0.064395	-60.54132	-17.19	-0.190926	0.024395	11.5437	17.098	-16.4073	2.2425	-59.6085	0.194114	0.858004	0.593219	0
124.268	0.068872	11.5067	21.1292	-4.2337	-60.36230	-17.19	-1.56049	-0.0759926	9.096	18.3341	-10.469	11.4799	-68.1661	0.302739	0.677549	0.097362	0
319.078	0.066495	15.608	16.8713	-8.25763	-69.06434	-17.19	-2.46892	-0.0759926	5.37885	20.1505	-4.09045	4.18122	-80.252	0.299418	0.123466	0.293865	0
466.319	0.040533	12.9355	34.0524	-12.2879	-42.14444	-17.19	-3.36955	-0.0759926	-1.24626	16.3671	-22.9592	21.2379	-55.7718	0.159328	0.031434	0.413038	0
88.6806	0.071946	13.5954	21.1494	0.300661	-88.39036	-25.7089	-0.087694	0.023307	14.8906	-3.54567	61.2102	-0.847995	-68.7729	0.031381	0.331806	0.350924	0
241.203	0.083027	55.3523	28.1215	-0.097508	-60.99871	-17.19	-0.132033	-0.100643	-10.3991	16.1901	11.2957	15.5909	-67.5673	0.091636	0.03279	0.120677	0
125.529	0.056942	15.249	27.3386	-3.10763	-75.74726	-7.43448	-1.26982	-0.0759926	15.2363	17.8212	52.2083	-1.54786	-57.7747	0.116107	0.086555	0.04254	0
25.8081	0.064302	13.3422	24.7123	0.187453	-52.16461	-17.19	-0.107439	-0.103234	0.769629	17.8212	34.4804	10.2338	-63.0293	0.177872	0.025447	0.042428	0
217.556	0.085501	12.6461	22.6827	0.028028	-68.41980	-19.379	-0.104051	-0.069363	-12.0962	16.3602	12.4781	12.3306	-74.1443	0.09116	0.018938	0.160182	0
92.2826	0.065728	0.220842	36.4434	-3.20204	-87.02099	1.65194	-1.42324	-0.0759926	12.5273	22.9646	63.1635	-1.52196	-75.5012	0.051613	0.019584	0.019078	0
288.874	0.047897	-3.79023	20.1846	-6.68202	-81.48262	-27.0134	-2.99303	-0.0759926	10.6049	-6.96087	-18.9727	1.97582	-50.2836	0.464464	0.073308	0.01201	0
72.5938	0.025552	7.44875	23.9219	0.081877	-88.33397	-19.9343	-0.124678	-0.042219	23.6897	5.70071	-29.497	-3.12152	-62.043	0.904599	0.141873	-0.005935	0
205.177	0.048806	7.94803	21.5144	0.029238	-90.15190	-21.5704	-0.16614	-0.021887	18.2771	6.97733	-18.7628	-1.03384	-67.388	0.133485	0.44848	0.345235	0
140.494	0.072219	3.11047	23.6029	-3.45706	-85.28814	-25.5054	-1.28959	-0.390653	5.31339	10.1624	-14.3387	1.90644	-74.8055	0.849672	0.245497	0.043627	0
160.621	0.035383	-4.95889	19.8444	-5.63619	-71.22194	-26.7451	-2.58374	-0.466471	7.69592	1.4167	-22.6972	1.50454	-63.2702	0.9929	0.16567	0.028623	0
338.07	0.033066	3.79693	24.1748	-5.50433	-77.10545	-27.7755	-2.24053	-0.0759926	-0.002646	14.0242	-18.1648	9.41324	-69.486	0.150744	0.136029	0.05724	0
332.033	0.05615	22.9744	26.5404	0.34346	-75.32698	-52.3231	-0.103314	-0.213685	-13.3469	40.124	-19.4533	14.1338	-79.8403	0.889512	0.24761	0.67175	0
179.486	0.05124	11.7593	34.5257	0.15073	-86.00516	-32.1607	-0.099926	-0.0249	9.12907	4.22631	8.60174	5.2277	-54.0684	0.59234	0.368564	0.187224	0
206.824	0.050236	13.3422	27.7732	-2.67557	-63.98614	-17.19	-0.989937	-0.0759926	9.09824	9.34147	2.49969	6.17585	-59.4122	0.383326	0.286155	0.184654	0
312.455	0.041091	2.92847	24.7281	-11.9196	-76.03596	-45.6095	-3.46667	-0.0759926	-4.32933	37.7283	-32.7031	13.8508	-73.2131	0.205209	0.181596	0.4638	0
426.532	0.047229	13.3422	32.6746	0.065134	-58.83522	-17.19	-0.101529	-0.029314	5.87087	0.938353	5.09805	6.63134	-57.0088	0.182293	0.188439	0.342626	0
107.157	0.097427	13.3422	26.5246	1.52069	-45.21578	-17.19	0.258781	0.29265	5.29245	46.9428	-16.4487	14.7127	-80.067	0.266479	0.266764	0.39179	0
727.854	0.062607	43.0391	19.0891	-0.404679	-57.07289	-17.19	-0.231566	0.093575	2.15661	12.1111	8.64787	12.2231	-63.5724	0.042805	0.019697	0.254584	0
282.092	0.059801	45.5822	20.977	-0.163623	-62.60999	-17.19	-0.185856	0.044757	1.32435	19.6565	4.89704	13.8001	-74.8554	0.170432	0.027061	0.069591	0
-13.6357	0.048753	42.2226	14.676	0.316891	-86.63064	-17.19	0.110209	0.144774	20.9569	17.438	-13.277	10.8306	-53.677	0.124238	0.656366	0.457756	0
111.533	0.028515	36.491	5.10666	-0.165437	-92.83520	-17.19	-0.063736	0.170666	24.7701	30.3507	-23.5371	8.00896	-59.2404	0.171654	0.625237	0.330215	0
287.624	0.054758	52.4454	13.3703	-4.79451	-87.57367	-17.19	-1.12695	0.209218	11.6721	25.3872	5.24502	10.4064	-69.4229	0.064374	0.029593	0.072455	0
414.335	0.065455	44.4731	22.1958	-0.145571	-56.48869	-17.19	-0.109591	0.031382	1.91292	19.4606	4.52875	13.4995	-74.2122	0.031241	0.028906	0.641193	0
635.842	0.074005	-3.62447	28.4803	-13.2221	-50.12485	-24.1128	-2.95316	-0.0759926	1.34207	19.4649	-13.6493	11.3197	-68.5104	0.069801	0.034303	0.065747	0
225.93	0.09678	0.898461	23.0251	-8.99119	-83.37250	-38.5123	-3.68552	-0.391844	2.51155	30.0136	-13.4061	7.30511	-100.031	0.098657	0.115572	0.079611	0
74.6044	0.041493	11.3839	13.3232	-0.237418	-78.22753	-44.5379	-0.142686	-0.158519	17.6749	28.2206	-11.4597	1.51486	-64.6078	0.681459	0.013127	0.029448	0
27.4158	0.03866	14.1807	14.8355	-0.184357	-83.73404	-31.8447	-0.117536	-0.198112	19.5056	30.9924	-11.4757	1.03061	-66.2795	0.539327	0.134588	0.011344	0
3.47819	0.029187	10.5942	14.9011	-0.446464	-81.22811	-41.9668	-0.130316	-0.147449	14.9049	26.9199	-10.2993	1.62378	-63.4803	0.110204	0.015336	0.047522	0
526.417	0.053512	-0.178906	32.5777	-11.5639	-75.32781	-33.8434	-2.82285	-0.0759926	-1.74313	19.5763	-20.4414	13.1945	-74.512	0.117358	0.049713	0.02103	0
42.7191	0.054176	5.96169	17.214	0.387108	-77.02729	-24.7353	0.078461	0.081352	18.7532	12.3926	-20.6295	-0.020768	-61.4199	0.156035	0.782509	0.952095	0
147.534	0.069087	17.0783	18.0486	0.260152	-79.34534	-39.6614	-0.05412	0.016724	13.1812	17.8212	-71.2289	9.11047	-87.0395	0.549712	0.294306	0.140432	0
467.829	0.066554	0.247234	19.1408	-11.204	-74.43617	-34.9117	-1.03418	-0.0759926	3.58994	-19.2233	-47.8537	8.40229	-72.583	0.752023	0.250983	0.907849	0
344.301	0.053073	-10.4659	18.3625	-11.0325	-54.12728	-16.0569	-2.7405	-0.0759926	6.1979	-8.4816	-53.9329	12.4083	-71.8187	0.473179	0.537431	0.794761	0
131.545	0.059841	27.4316	29.3431	-1.31512	-86.40374	-57.3483	-0.604637	-0.092326	20.0958	6.23371	-57.1577	7.91255	-72.1886	0.204302	0.175859	0.544856	0
1.25606	0.045643	10.3146	15.5882	0.450164	-90.15181	-21.5989	0.118217	0.065304	19.4408	8.47937	-52.2548	3.23926	-68.2558	0.422134	0.625938	0.76088	0
187.655	0.051128	12.6316	27.6344	-4.57634	-77.14399	-37.2784	-1.97215	-0.0759926	6.14563	23.3738	49.2462	-7.44553	-64.7441	0.143733	0.103861	0.026208	0
34.3752	0.057003	10.7373	38.5739	-0.083153	-79.89514	-37.1723	-0.018794	-0.015592	6.05258	16.6278	45.9926	-0.054139	-60.2903	0.640558	0.114152	0.748236	0
89.2929	0.056531	13.6093	16.6922	-0.112994	-76.34451	-36.1527	-0.141332	-0.030069	9.8756	24.9939	40.5131	-2.71779	-56.6619	0.012611	0.240093	0.278182	0
224.717	0.074272	20.5292	34.7346	-4.06329	-79.09063	-38.4421	0.433907	-0.0759926	-1.86655	31.1717	42.6657	6.99564	-86.4791	0.11188	0.154347	0.087829	0
166.886	0.048947	14.8805	16.6922	-0.126332	-74.94013	-32.7755	-0.057601	-0.002179	12.9212	26.9751	40.7412	6.44762	-53.7631	0.090008	0.172228	0.330099	0
393.429	0.084117	9.41968	14.0534	-7.3819	-80.62039	-42.63	-2.24487	-0.0759926	0.725118	39.898	37.1107	7.18179	-88.385	0.048964	0.053631	0.01361	0
244.657	0.0603505	-5.37714	29.1504	0.135264	-53.88288	-32.4262	-0.022888	0.021961	-5.92152	6.60527	31.1764	6.18368	-37.0459	0.292973	0.185262	0.294059	0
245.128	0.0603505	8.70569	25.3318	0.002278	-47.29884	-38.754	-0.115226	-0.013613	-2.07898	3.26966	35.0841	2.98748	-47.9876	0.358006	0.012402	0.114972	0
282.139	0.074135	49.4771	28.0961	-3.02956	-66.16002	-17.19	-1.03418	-0.0759926	-4.92872	-8.85677	49.1077	4.45366	-60.4421	0.326123	0.217798	0.145738	0
81.6629	0.07982	-5.473	31.536	-0.215173	-80.91070	-59.3215	-0.17292	-0.053041	4.97666	-12.731	55.0827	1.93037	-57.2967	0.375692	0.104008	0.274567	0
210.224	0.087389	9.70859	25.6175	0.000741	-90.03198	-17.19	-0.092606	-0.14021	-3.14593	0.523227	49.2374	4.35856	-83.0942	0.552778	0.082347	0.159886	0
122.687	0.07726	1.5345	28.0737	-0.145637	-71.52885	-54.7032	-0.190555	-0.029327	7.97037	4.96054	47.0237	1.08157	-54.9072	0.713338	0.414398	0.269269	0
348.465	0.094332	9.29505	24.2394	-5.53452	-32.59690	-17.19	-0.653269	-0.0759926	-6.95038	14.2461	9.48647	3.19012	-62.5344	0.030636	0.136674	0.017099	0
34.7029	0.090365	18.6075	26.6749	-2.94493	-59.68740	16.7568	-0.608478	-0.037951	-1.08884	6.20201	10.1583	2.97018	-55.7357	0.375902	0.358709	0.352919	0
199.658	0.074934	13.079	18.7238	-4.33756	-38.99092	32.4994	-1.01867	-0.233047	-5.06133	16.5653	12.6283	-0.088967	-62.8173	0.570646	0.105362	0.071333	0
70.9573	0.10973	22.9386	20.3231	-0.050938	-43.21421	30.0143	-0.136435	-0.051108	8.02134	8.6533	12.7692	0.19472	-52.2169	0.049823	0.403795	0.149105	0
126.949	0.08213	12.7459	26.5233	-0.295442	-67.47266	-4.95977	-0.401461	-0.16947	0.461761	18.0504	12.9046	0.024052	-68.557	0.003568	0.910172	0.093143	0
78.4167	0.076065	15.9524	28.7302	-0.433832	-66.054368	-1.84583	-0.548321	-0.210064	4.86367	19.9217	14.9912	0.146259	-65.7841	0.01866	0.499616	0.136643	0
497.572	0.072129	-10.4156	25.9948	-9.21691	-75.172892	-36.0845	-3.09118	-0.0759926	5.6821	12.2171	-12.9983	14.7694	-80.4184	0.627903	0.22693	0.033695	1
263.163	0.037056	9.02794	24.4126	-5.25236	-73.535533	-42.8635	-1.42138	-0.0759926	16.0398	22.9584	-3.3685	10.5456	-70.6774	0.233947	0.7861	0.760697	1
325.765	0.044619	8.6139	27.6423	-0.02339	-70.012324	-61.6495	-0.056303	0.013254	5.82791	19.8646	4.46367	12.719	-74.1016	0.3318	0.883953	0.85855	1
217.117	0.03646	5.08926	22.8132	-5.89375	-63.224482	-52.6325	-2.11185	-0.0759926	13.8271	12.3333	0.593458	6.45785	-56.3091	0.376201	0.479241	0.059527	1
371.742	0.044823	-5.01701	20.9508	-8.412	-52.740412	-47.6881	-3.5725	-0.0759926	12.1327	9.63292	3.9296	7.51342	-52.8735	0.502169	0.485034	0.479264	1
442.122	0.048938	-0.582336	26.5535	-9.88975	-65.628695	-45.5316	-3.88426	-0.0759926	1.19748	18.6134	1.12659	15.2062	-72.8353	0.118915	0.395687	0.998481	1
214.56	0.046498	-26.0257	14.0442	-8.42221	-46.929444	-39.6105	-3.45632	-0.0759926	11.4969	-5.6773	-10.0528	7.50618	-45.2205	0.497469	0.105356	0.060762	0
406.399	0.055378	13.3422	19.7712	0.006992	-37.959225	-17.19	-0.074331	-0.000986	14.8219	-4.89583	-10.2155	3.81689	-48.5613	0.036662	0.070375	0.111357	0
586.165	0.020201	13.3422	18.1729	-0.019856	-64.623603	-59.8488	0.016714	-0.002372	11.3611	-6.69107	2.76973	3.51599	-43.1466	0.139263	0.551628	0.409807	0
281.215	0.02432	13.3422	12.4396	-3.02956	-47.164300	-32.6731	-1.03418	-0.0759926	15.9473	-5.84798	1.25784	1.38267	-46.1725	0.04341	0.257251	0.037191	0
720.34	0.024073	-13.8065	9.55102	-6.67742	-53.292054	-57.5512	-0.849878	-0.0759926	24.3288	-4.913	0.799612	-8.69946	-41.1076	0.101549	0.333927	0.233671	0
406.805	0.074212	13.3422	16.647	-3.02956	-40.740010	-74.6409	-2.38965	-0.0759926	8.56542	17.8212	-2.55595	6.76592	-64.3534	0.069569	0.168311	0.037771	0
555.464	0.059645	-9.39619	22.972	-0.302744	-22.654278	-17.19	-0.111883	-0.111523	9.86142	52.2886	-9.03369	6.02463	-49.9412	0.64117	0.241297	0.093915	0
495.955	0.032152	13.3422	25.9508	-6.60888	-34.441500	-17.19	-0.041802	-0.0759926	14.8289	28.653	-5.21618	1.90494	-52.6574	0.473032	0.359488	0.097214	0
204.56	0.041715	-12.2608	26.1652	-5.93197	-64.236031	-17.19	-0.135472	-0.0759926	7.01631	55.6442	-26.3761	4.37318	-52.2104	0.544868	0.258024	0.166593	0
300.411	0.044781	-13.8042	28.6039	-5.94335	-61.343607	-17.19	-0.568222	-0.0759926	4.66647	48.8502	-31.4297	3.37569	-51.8826	0.335638	0.137775	0.097047	0
432.492	0.058185	9.3312	26.3943	-0.068572	-67.521603	-17.19	-0.138965	-0.009612	1.83672	15.369	-3.27661	5.21547	-53.1643	0.383168	0.326765	0.066931	0
183.461	0.076882	13.3422	26.3665	0.689983	-30.992758	-17.19	-0.036838	0.024394	10.3072	1.7947	19.7173	9.02179	-43.9145	0.740685	0.255543	0.251218	0
128.71	0.050346	-21.0116	21.82	-0.468622	-51.595475	1.41286	-0.238002	-0.026212	12.126	21.2059	8.14828	6.77831	-60.0114	0.049543	0.014658	0.789657	0
63.3183	0.050317	-20.039	26.9147	-0.11052	-66.604161	17.9768	-0.166657	-0.016143	13.1666	18.5901	5.9452	1.26738	-62.4957	0.098011	0.696385	0.030342	0
181.377	0.046674	13.3422	20.2736	-2.50216	-50.297936	4.21654	-0.438537	-0.344936	12.0614	7.62162	-5.20942	5.74177	-58.0555	0.096517	0.587954	0.214119	0
413.445	0.040542	13.3422	30.4986	-0.016528	-59.45302	-5.08015	-0.094785	-0.016535	4.14983	7.38242	-10.0733	18.7726	-65.3473	0.215151	0.43099	0.693908	0
347.242	0.074955	-19.2076	29.7073	-0.194734	-63.61126	-9.79519	-0.116436	-0.075359	-0.126282	10.7007	-11.6667	19.953	-70.0356	0.099347	0.426615	0.23437	0
183.399	0.058837	-4.38197	29.885	0.756426	-31.86415	32.1853	-0.050199	-0.057265	-6.75985	15.8553	-2.50712	17.3833	-67.6815	0.136555	0.613792	0.283035	0
447.562	0.046489	0.446712	25.2964	-6.20036	-78.06793	-37.8231	-2.28733	-0.0759926	5.45446	-9.21524	-47.983	14.7768	-66.4579	0.092893	0.096798	0.234014	0
348.693	0.078902	-1.46962	22.7544	-6.77825	-67.40056	-40.7248	-1.45586	0.119701	-1.0207	18.3006	-7.59306	14.0726	-80.4158	0.039774	0.09462	0.096786	0
126.28	0.054063	4.41824	22.3719	-0.37185	-74.02848	-40.4922	-0.236866	-0.013301	10.5304	-4.2829	-30.3297	11.6656	-54.3028	0.217004	0.147335	0.107803	0
50.4528	0.077757	10.1134	23.0297	0.237445	-78.70525	-54.4425	-0.052346	0.021809	-1.60426	23.3752	-2.071	15.3455	-86.6213	0.102566	0.140408	0.029542	0
171.451	0.04157	5.14964	26.3849	-0.269808	-79.98148	-44.9493	-0.224824	-0.047578	12.2128	-16.34	-44.3398	11.2761	-58.4714	0.15256	0.160662	0.142007	0
84.7486	0.088571	11.8746	17.417	-1.22895	-75.15003	-49.2715	1.447	-0.0759926	-0.548522	25.0569	3.18183	12.5889	-95.1148	0.144386	0.142586	0.218442	0
169.744	0.061665	13.3422	24.4533	-0.310718	-38.30660	-33.4051	-0.301632	-0.210717	-3.92571	-5.84238	20.3348	14.1783	-55.2009	0.382882	0.05856	0.031928	0
137.89	0.058063	2.25326	28.8915	-0.349673	-66.61100	-58.0227	-0.275581	-0.083851	-2.88335	-1.13554	35.0034	6.79412	-62.074	0.381233	0.034559	0.019641	0
366	0.064814	13.3422	21.9325	-7.03613	-69.63587	-50.6982	-1.92118	-0.0759926	-6.45404	6.79123	14.4317	11.6461	-72.2293	0.047393	0.027542	0.021568	0
215.757	0.092534	-19.9646	25.2532	-5.7984	-29.09337	-15.498	-0.74136	0.19767	-0.928624	17.8212	63.8022	12.6937	-52.0527	0.17949	0.693648	0.26364	0
56.3533	0.059789	16.9847	19.6156	-0.136803	-81.22621	-71.5543	-0.171149	0.007532	0.876216	-1.00733	27.8916	10.6551	-69.9961	0.258265	0.023252	0.185618	0
25.7313	0.053605	3.86003	29.225	-2.32869	-79.10582	-61.0765	-0.943933	-0.224218	1.04886	4.10163	30.1895	5.77413	-67.6214	0.289562	0.005653	0.022213	0
144.078	0.08254	-17.7378	26.728	-2.97143	-69.72119	-30.9286	-0.460568	-0.167484	15.5692	14.3991	43.4591	7.82953	-58.2432	0.020854	0.06969	0.64106	0
119.669	0.093078	13.3422	24.5225	-9.07334	-50.52874	-25.4516	-2.95106	-0.0759926	4.06346	12.254	35.237	12.6233	-64.1341	0.2116	0.348426	0.445173	0
341.075	0.102738	13.3422	21.616	-10.9874	-59.60901	-23.038	-1.7199	-0.032813	3.44863	18.7757	43.132	13.7724	-80.041	0.124707	0.046956	0.738551	0
58.5817	0.076014	-18.4362	24.536	-0.071167	-81.39761	-43.7174	-0.15726	-0.034554	17.6401	15.5694	41.8425	7.23825	-64.5534	0.092404	0.350002	0.68519	0
88.9442	0.074244	-19.1744	28.3577	-0.121151	-83.11770	-30.3179	-0.233491	-0.117343	18.9701	23.2355	47.6446	7.88613	-62.9467	0.093911	0.254811	0.678093	0
513.874	0.074462	13.3422	24.557	-12.5722	-60.88184	-30.1481	-3.1502	-0.0759926	3.79691	15.14	43.6561	14.4668	-74.2413	0.206759	0.146192	0.396928	0
440.865	0.031138	-28.9319	14.1208	-12.2531	-47.26350	25.5694	-3.79641	-0.0759926	4.44202	33.7807	-38.0531	3.04719	-51.6552	0.174024	0.348969	0.253348	1
872.698	0.041015	13.3422	17.8585	-3.02956	-41.72368	24.9435	-1.03418	-0.0759926	-13.0801	34.5054	-19.301	14.3868	-61.6842	0.142931	0.41204	0.682998	1
352.778	0.058976	13.3422	17.375	-12.6642	-63.44879	-17.19	-1.03418	-0.0759926	-6.39497	27.1569	-19.62	11.8202	-77.9643	0.125122	0.080279	0.591058	1
342.737	0.038978	13.3422	17.8158	-0.451504	-66.29094	-17.19	-0.173077	-0.07419	1.89753	32.4137	-21.8432	5.42788	-72.6065	0.495179	0.844245	0.713396	1
156.655	0.06492	13.3422	17.1644	-0.26051	-61.81719	-17.19	-0.135731	-0.079436	-8.93873	30.2977	-13.0995	11.0626	-79.6962	0.237895	0.017524	0.454129	1
259.15	0.032884	13.3422	14.0329	-0.376209	-65.75091	-17.19	-0.164053	-0.105902	4.8546	29.5302	-25.9107	3.72214	-72.097	0.341555	0.060899	0.568544	1
182.101	0.053091	11.2357	26.9325	0.115649	-85.50634	-31.666	-0.113791	-0.028344	7.87441	16.545	-7.69897	5.63511	-67.1463	0.022689	0.624907	0.112077	0
-101.979	0.052062	-2.49005	23.4556	-0.932419	-90.16737	-29.0983	0.112036	-0.451549	5.76953	32.8835	-11.0411	4.78829	-68.8074	0.001703	0.060805	0.055108	0
168.045	0.060045	7.52992	26.0199	-3.88294	-77.38023	-28.8438	-1.66356	0.009795	3.50156	16.3822	-8.14047	6.63364	-60.361	0.00142	0.465876	0.254494	0
441.842	0.077897	-2.43456	30.0201	-9.90361	-63.52253	-26.2295	-3.42322	-0.0759926	-4.42639	18.2056	-13.8357	12.0096	-67.4147	0.001389	0.760528	0.903165	0
569.653	0.057543	6.10774	27.2585	0.286554	-81.18956	-34.4911	-0.073262	0.024155	1.6858	5.46591	-12.372	7.06654	-65.3705	0.001388	0.26795	0.214846	0
494.654	0.066371	-2.3797	22.125	-0.026941	-78.50943	-32.7159	-0.092283	-0.011792	-2.31365	19.5859	-9.6966	8.02546	-77.5862	0.001617	0.367943	0.219383	0
285.446	0.048216	28.2175	18.5489	-7.20738	-67.29040	10.3418	-3.102	-0.0759926	-2.83853	24.1868	2.23538	15.5715	-73.6044	0.153208	0.09341	0.034081	0
44.9013	0.04861	36.6107	22.6731	-0.227201	-66.47640	-17.19	-0.115555	0.046788	9.98215	2.29718	23.8905	9.86826	-51.0932	0.384445	0.115667	0.033101	0
189.326	0.037197	43.3926	20.0921	-6.94771	-66.14656	-17.19	-2.0096	-0.0759926	1.31073	22.561	5.71404	13.395	-78.5009	0.359364	0.159904	0.003738	0
73.2049	0.054052	9.88755	23.1741	0.1218	-75.44474	-53.5113	-0.083841	0.071202	12.283	10.4633	17.4087	11.065	-48.9603	0.290112	0.299393	0.050496	0
110.602	0.094297	31.3473	17.4898	-2.32062	-61.97132	-17.19	-0.716568	-0.0759926	-5.5446	33.8422	10.4423	11.7676	-85.2306	0.178078	0.126672	0.049443	0
30.4001	0.051799	36.6349	26.6288	0.262252	-68.44698	-17.19	-0.058713	0.038719	10.1935	7.26663	25.6507	10.6	-48.1544	0.928253	0.236441	0.080453	0
49.2337	0.023625	23.9298	7.18175	0.003289	-82.77946	-13.6935	-0.157437	-0.036569	23.9749	14.0132	-32.7596	-18.9209	-54.6662	0.472949	0.214999	0.108066	0
0	0.050186	15.3508	4.00661	-6.24901	-71.72854	-10.4249	-2.61787	-0.0759926	14.6969	-1.32817	-22.1967	-10.0348	-44.8784	0.385482	0.063876	0.504192	0
12.0495	0.045126	24.3775	5.10788	-4.94214	-84.14983	-12.6859	-2.3321	-0.0759926	19.4249	12.2196	-25.1954	-17.8465	-60.0172	0.146697	0.348969	0.338982	0
82.4892	0.094226	26.9424	12.4467	-8.43481	-73.92399	-11.9451	-2.28942	-0.0759926	-5.37578	13.0881	-14.6095	-9.46437	-55.9778	0.069529	0.777327	0.643393	0
78.3588	0.07523	21.0001	5.9206	-3.25543	-78.23307	-12.1324	-1.20467	0.43408	4.9573	16.1321	-20.0743	-13.5303	-65.0851	0.21939	0.130453	0.113091	0
0	0.050619	25.3963	8.0534	-2.34549	-82.81595	-15.0162	-1.28954	0.05521	14.4885	20.5139	-31.0624	-12.8079	-64.8165	0.239035	0.122505	0.072329	0
433.47	0.072025	-0.345956	13.9821	0.296132	-44.26063	10.7942	-0.166276	-0.058046	16.5685	6.12866	14.3941	-9.79871	-44.9299	-7e-06	0.545147	0.847657	0
492.717	0.062102	-2.57821	5.01561	-0.763032	-39.83801	13.1128	-0.227294	-0.017353	6.06212	2.17309	8.3118	9.08435	-56.2058	1e-06	0.027052	0.029513	0
125.714	0.098822	4.09671	12.7792	-0.492061	-58.26571	-14.3928	-0.082537	0.010716	13.9464	8.96569	19.9011	28.7721	-45.7448	-7e-06	0.02491	0.775829	0
651.046	0.058435	0.805005	9.60983	-8.8075	-46.14083	12.5927	-2.06189	-0.190332	2.93222	1.59848	7.16354	11.7866	-58.9265	-5e-06	0.031658	1.47154	0
503.894	0.061879	3.01386	10.6549	-0.038859	-58.51332	6.4699	-0.124369	-0.007693	16.0998	8.20563	20.2513	-6.10535	-58.3351	1e-06	0.010929	0.068342	0
281.215	0.060662	-2.77122	2.9285	-5.35689	-40.58204	12.8501	-1.00921	-0.0759926	2.15619	1.1398	10.1786	7.73555	-56.3968	-7e-06	0.03484	0.035836	0
-4.04607	0.038654	11.2705	10.1179	0.069554	-66.59411	-6.11456	0.067796	0.088187	17.338	19.9601	10.048	-1.26558	-60.2955	0.453491	0.348969	0.859478	0
764.975	0.056448	16.8456	5.82793	-0.115371	-66.18196	-7.40538	-0.114875	-0.008123	4.37671	17.7064	-0.983299	5.0259	-78.1923	0.727228	0.089486	0.039817	0
281.215	0.029987	17.8422	6.53333	-0.278822	-72.57057	-9.98362	-0.205484	-0.010917	14.9834	6.11221	-1.77275	-5.31436	-54.771	0.545666	0.057272	0.014902	0
160.277	0.033705	10.6025	3.78251	0.121097	-66.42701	-5.74858	-0.029774	0.020757	18.9864	18.0223	10.085	-0.461169	-61.5693	0.550978	0.043164	0.018252	0
419.951	0.059845	10.7816	3.93508	-0.589282	-65.00330	-8.96146	-0.195009	-0.058679	4.81462	10.5391	-1.15124	4.95561	-72.3567	0.209537	0.348969	0.28769	0
518.801	0.051649	9.62825	7.63007	-0.212183	-46.52204	-7.74732	-0.282581	0.085039	3.73142	-3.03105	-1.91798	11.2662	-60.3306	0.958134	0.043682	0.011577	0
281.215	0.052157	15.3593	11.3638	-0.046975	-74.97491	-2.98927	-0.012877	0.009499	22.9626	27.1887	21.5935	6.80516	-55.0134	0.554988	0.017596	0.039715	0
-236.836	0.075896	25.0944	4.14097	-4.47167	-75.40814	-2.92042	-1.96346	-0.0759926	3.08987	22.7211	26.7716	6.80516	-87.8396	0.922739	0.261269	0.994286	0
479.541	0.061635	9.43436	6.36871	-3.65651	-64.89878	-4.75192	-1.60866	0.308312	19.983	18.0682	23.6954	6.80516	-51.0871	0.421633	0.048319	0.042289	0
135.25	0.062401	9.03736	-0.525784	0.176944	-61.93566	-7.05655	-0.034594	0.018265	8.28608	22.505	24.9488	6.80516	-78.0505	0.160354	0.033205	0.031345	0
394.509	0.056243	8.82533	4.28015	-0.295594	-62.67469	-7.83233	-0.099174	-0.01211	3.68945	14.0319	18.3349	6.80516	-67.8094	0.603585	0.331179	0.044739	0
281.215	0.060635	12.6947	6.78955	-3.2012	-69.91656	-7.01344	-1.14838	0.034514	18.7192	18.8306	21.1273	6.80516	-54.6666	0.087852	0.01913	0.082918	0
336.375	0.054509	18.5803	9.58456	-0.47417	-47.28781	-16.5356	-0.170261	-0.029911	16.3413	1.00478	-16.2795	-9.18924	-50.6363	0.062898	0.06238	0.189668	0
486.215	0.018286	19.9802	9.25613	-0.047065	-43.00785	-16.5766	-0.127096	-0.017036	13.544	-5.0388	-1.80439	-4.53514	-45.4952	0.225533	0.564701	0.881166	0
328.741	0.034118	19.5147	7.72505	-5.90118	-61.69810	-16.9566	-2.50007	0.235516	13.7243	14.6407	-17.4511	-18.1139	-59.0174	0.367306	0.308264	1.16327	0
613.114	0.021114	21.7481	5.17581	-3.02956	-46.66103	-17.919	-1.03418	-0.0759926	18.3549	-2.88781	-5.70035	-10.0347	-49.3837	0.153225	0.154449	0.084682	0
514.06	0.010877	6.77439	3.38097	-6.65417	-50.81428	-15.7361	-2.55683	-0.388907	24.1817	10.6333	-20.8647	6.80516	-43.9353	0.198164	0.346844	0.494058	0
345.702	0.103836	21.994	9.29452	-13.3666	-51.84770	-18.0052	-1.03418	-0.0759926	-2.05621	17.8212	63.224	-2.43338	-74.1956	0.133539	0.177242	0.017421	0
105.985	0.079266	8.97336	5.61565	-5.99734	-61.82631	-32.0855	-2.76058	-0.0759926	-0.730982	16.7679	-20.7172	-3.28242	-60.6479	0.950449	0.855681	0.126297	0
106.113	0.094858	16.4611	8.32134	-5.02591	-75.88345	-36.3647	-1.88418	-0.0759926	-4.48375	27.9579	-29.2964	-5.23074	-75.433	0.950449	0.644454	0.365349	0
286.322	0.053538	23.5482	9.13648	-6.02897	-83.97729	-34.4668	-0.937909	-0.0759926	3.9015	14.4508	-18.9754	-2.22346	-75.7466	0.950449	0.418567	0.23932	0
334.672	0.109738	14.498	13.2206	-8.93422	-66.86551	-30.5667	-3.3435	-0.0759926	-1.52639	15.2911	-30.298	4.7602	-65.8996	0.950449	0.348969	1.28131	0
495.921	0.043964	32.3866	8.66834	-4.23482	-88.16043	-30.0925	-1.77596	-0.0759926	11.4826	10.6451	-18.9843	-11.268	-78.7564	0.950449	0.477575	0.352329	0
431.683	0.056757	31.0105	12.5319	0.159273	-71.81162	-22.5169	-0.278101	-0.09736	8.92384	14.875	-24.1338	-17.8913	-68.4299	0.950449	0.905388	0.718031	0
39.2965	0.078235	19.051	10.5004	0.900389	-48.17781	-6.93371	0.056183	-0.005911	-7.3441	14.2252	-4.99032	19.8893	-77.1305	0.07179	0.173258	0.24432	0
48.5876	0.061609	14.3095	8.08746	-8.58288	-73.46811	-19.3128	-3.18799	-0.0759926	4.70505	8.64456	-9.76931	19.7666	-64.0796	0.080357	0.030869	0.138875	0
-0.150311	0.059159	15.1413	5.07344	-0.653678	-68.52401	-14.9912	-0.28897	0.020771	11.0627	5.79102	-8.35856	15.4753	-51.5518	0.13374	0.07656	0.092548	0
405.818	0.082458	27.5026	5.90591	0.339839	-72.07090	-18.1906	-0.059465	-0.007252	-3.9086	22.1535	-0.168402	12.9882	-82.1149	0.049855	0.186935	0.390475	0
164.827	0.055163	15.9719	9.32633	-0.496582	-74.53759	-17.2489	-0.273615	-0.017156	12.179	5.46089	-11.3954	16.7143	-55.9441	0.108299	0.064798	0.142729	0
721.062	0.090513	30.2448	0.172009	-1.56189	-72.77729	-16.5013	-1.03418	-0.0759926	-3.47007	23.8556	-0.090799	6.8891	-90.5976	0.253964	0.123764	0.343501	0
14.3784	0.060023	21.0759	9.75651	0.455528	-81.39848	-15.3304	-0.076474	0.004983	15.8236	17.8212	51.7479	6.80516	-54.3401	0.079104	0.547677	0.731224	0
363.957	0.084137	14.8674	13.5305	-0.175847	-63.68843	-12.6647	-0.16529	-0.087832	-9.15898	17.8212	-43.2494	-20.3426	-49.4748	0.099801	0.03587	0.320987	0
202.379	0.047118	8.4556	9.47582	0.257874	-58.17980	-9.10345	-0.171384	-0.075724	5.36261	17.8212	-25.1244	6.80516	-51.1257	0.065213	0.140916	0.332607	0
15.4841	0.041467	11.1995	18.6731	0.120865	-77.00547	-13.3654	-0.058587	0.030719	15.9273	17.8212	55.1194	6.80516	-58.4943	0.099196	0.227942	0.4394	0
327.955	0.085742	16.3888	12.4343	-0.20113	-63.72233	-10.9139	-0.142974	-0.084556	-11.4565	55.8875	-36.9874	6.80516	-56.8683	0.043907	0.042071	0.430382	0
27.5584	0.04997	11.8365	19.3283	-3.47759	-82.98670	-16.4761	-1.87415	-0.490191	14.8259	17.8212	19.5064	6.80516	-60.0563	0.073861	0.020067	0.51531	0
281.215	0.062671	-1.08752	8.93198	-2.90085	-39.70584	-12.7512	-1.86586	0.211281	2.11957	5.41472	-0.260189	23.6372	-48.9776	0.595038	0.258103	0.067519	1
426.117	0.081602	7.12261	12.9765	-8.99947	-71.57847	-16.2	-3.79401	-0.0759926	3.00979	10.5794	4.16125	29.6246	-82.9662	0.334915	0.302855	0.503573	1
281.215	0.05922	19.8014	12.1032	-0.326867	-66.58910	-17.4138	-0.132812	-0.050101	0.128852	22.434	9.26341	24.7153	-82.3771	0.174186	0.717812	1.24531	1
281.215	0.068231	19.6455	12.2361	-3.90906	-73.81266	-15.7553	-1.39257	-0.241707	10.626	17.4319	10.4569	25.0639	-75.1374	0.347642	0.317393	0.503573	1
693.518	0.061584	14.1138	14.6544	-0.258691	-66.28293	-19.4063	-0.179579	-0.002572	5.23405	15.8827	13.804	31.3029	-83.5484	0.72012	0.30968	0.11189	1
281.215	0.046226	22.6478	11.2404	-5.13921	-70.63830	-16.3396	-2.21349	-0.0759926	15.5747	22.171	7.86579	24.2131	-72.3884	0.249697	0.218668	0.503573	1
-337.703	0.080172	16.9208	1.98845	-0.631749	-37.07700	-0.612727	-0.342908	0.132829	12.8825	15.1099	4.24065	12.6493	-64.7586	0	0.071243	0.041006	0
281.215	0.07499	3.90763	6.97135	-0.875345	-75.34106	0.413351	-0.734879	0.135688	11.8133	3.64959	-1.43984	11.7377	-57.8327	0	0.20772	0.449315	0
281.215	0.066624	3.8474	9.59721	-0.043789	-57.20870	-0.092005	-0.185824	-0.027479	5.82844	1.17302	3.78366	14.4537	-53.0405	1.3e-05	0.138169	0.061858	0
281.215	0.086321	13.2139	7.3168	0.069082	-68.99839	-0.529649	-0.056138	-0.056041	6.4909	10.8547	3.45975	21.311	-71.5217	0	0.150646	0.217897	0
899.383	0.092017	11.0168	7.52195	-1.06128	-64.32895	3.25532	-0.497613	0.355074	10.0889	5.8747	4.49388	13.6576	-59.6783	0	0.064515	0.056195	0
75.9346	0.074758	-3.2897	2.48611	-0.951645	-52.37330	-0.514982	-0.77818	0.13288	13.1564	-1.58222	5.99538	9.10228	-56.2698	0	0.073664	0.055805	0
107.157	0.044374	51.3506	20.8651	-4.07202	-56.75439	-19.1701	-1.76395	-0.0759926	-3.66652	52.0192	-38.7648	6.80516	-57.4372	0.374708	0.400472	0.680213	0
635.109	0.0603505	55.7868	18.565	-0.761185	-33.70577	-4.29783	-0.415105	-0.001163	-9.68334	31.6323	-27.5324	-14.563	-59.198	0.48557	0.348969	0.695352	0
625.992	0.012953	46.7377	19.1257	-0.379487	-55.23980	-19.0413	-0.701157	-0.187609	14.2864	20.5431	-29.5617	6.80516	-40.4654	0.560587	0.348969	0.72798	0
-1.10404	0.059766	45.6431	18.5229	0.461595	-42.47511	-9.19108	-0.095179	-0.044684	-14.056	45.6909	-21.4247	-17.8304	-71.0697	0.922023	0.348969	0.693322	0
179.729	0.116217	51.1676	17.7055	-0.899148	-37.22941	-9.4367	-0.433934	-0.007941	-3.17116	29.8951	-29.3773	-13.384	-54.3333	0.688707	0.348969	0.68934	0
-4.20432	0.044271	51.9673	17.1829	-13.4586	-47.67994	-14.3005	-2.25264	-0.0759926	-2.99759	40.7573	-32.7882	-13.0644	-65.9457	0.194272	0.688146	0.654777	0
-0.411986	0.085847	45.444	15.9553	-2.13514	-49.80987	-12.0586	-0.230793	0.208965	17.9124	13.9665	28.6098	25.3565	-58.6231	0.02097	0.058286	0.144619	0
461.533	0.089065	49.3493	13.5514	-6.80892	-41.76334	-11.4555	-1.96189	-0.478965	6.44588	12.0107	17.1164	29.1299	-65.4604	0.307835	0.185711	0.143938	0
366.621	0.073295	57.1066	10.2358	0.349088	-46.54199	-10.4515	-0.156444	-0.080782	19.6574	19.4616	27.0088	27.8599	-64.2278	0.146121	0.467488	0.146226	0
720.146	0.10159	13.3422	15.982	-7.96929	-26.49903	-3.23954	0.078083	-0.0759926	3.17293	16.3961	21.1999	30.1569	-81.3778	0.089324	0.053958	0.145158	0
117.57	0.077467	58.9583	14.8283	-2.37805	-62.41027	-18.7904	-0.843696	-0.104994	19.5479	16.6536	30.1728	24.1494	-65.5713	0.070309	0.328953	0.141924	0
426.253	0.107559	58.1027	15.4805	0.312647	-51.45737	-15.9083	-0.031871	0.006999	-3.1283	18.6727	20.9011	26.7394	-82.9176	0.983506	0.109635	0.163604	0
-10.8015	0.031272	21.4617	15.2722	-0.801362	-30.11967	-3.65319	-0.180278	-0.014585	-14.1597	33.6885	1.07927	-15.4813	-56.1555	0.300518	0.348969	0.681081	1
401.708	0.039912	28.4962	4.41635	-1.70285	-68.38372	-10.1883	-0.420904	0.114936	-10.0577	41.605	6.72746	6.80516	-57.9731	0.37679	0.05961	0.699304	1
800.984	0.051271	25.275	9.37394	-5.94266	-50.25136	-7.60102	-1.04154	-0.137448	-19.3961	35.0086	5.47642	-19.13	-73.6569	0.653298	0.267794	0.649395	1
211.688	0.022956	31.0249	2.85468	-2.26185	-62.04105	-10.284	-0.949866	0.149489	-10.9547	37.9677	11.5141	6.80516	-44.1334	0.15926	0.348969	0.796555	1
281.215	0.033907	16.7846	12.7821	-6.57974	-54.47983	-8.374	-1.56558	-0.0759926	-9.50517	26.706	1.45511	6.80516	-67.2472	0.41648	0.348969	0.881632	1
247.07	0.034714	29.0415	6.73165	-0.135081	-71.37682	-11.5876	-0.115634	-0.006204	-12.1722	37.4927	10.4723	6.80516	-57.1841	0.188013	0.348969	0.74129	1
52.21	0.055012	12.9415	18.8082	-9.49962	-83.51212	-20.3974	-3.12535	-0.0759926	-1.93562	22.3803	-23.6957	-7.05611	-67.0801	0.091898	0.02025	0.014507	0
21.3851	0.076035	24.4154	21.1425	1.02432	-66.98415	-16.033	-0.041763	0.013069	-2.431	39.5321	-13.9589	-12.7876	-81.8884	0.066936	0.067852	0.248468	0
-0.219093	0.034065	19.4303	4.32459	-0.164259	-63.96599	-19.3627	-0.117908	-0.170586	18.8236	31.659	-18.2374	-14.4179	-60.9325	0.25852	0.066624	0.040163	0
181.719	0.021447	16.0447	7.42983	-0.736333	-69.10450	-20.4644	-0.386382	-0.132839	19.5295	30.1467	-17.3495	-15.9196	-58.1787	0.233935	0.199349	0.056515	0
248.846	0.110069	18.9122	14.467	1.10283	-56.84199	-13.8477	0.026357	-0.013216	-3.81651	39.3054	-14.305	-13.574	-77.7367	0.15347	0.135131	0.077618	0
106.584	0.034466	26.5656	2.84523	-0.881841	-43.35570	-2.14288	-0.674713	-0.098027	13.3903	20.4013	-11.0743	-16.3399	-42.1538	0.075018	0.17107	0.503573	0
-1.04027	0.04391	25.6225	11.176	-0.504251	-59.86829	-2.61002	-0.281778	-0.037348	11.6808	18.1097	-5.08551	-8.79578	-53.1746	0.052862	0.019017	0.503573	0
166.288	0.07589	26.4269	14.9811	-0.472565	-61.36364	-8.76759	-0.200045	-0.041868	-0.355543	10.0956	-7.351	11.8616	-68.6889	0.092335	0.320257	0.503573	0
62.5981	0.037285	35.4396	11.5924	-2.50864	-72.66503	3.84445	-1.0239	0.379827	16.2864	18.8436	-0.282217	1.34145	-62.6489	0.145957	0.360707	0.503573	0
206.155	0.059501	13.3422	15.9256	1.08155	-51.49506	-3.69336	-0.006493	-0.127934	-6.6021	15.4137	-1.19353	13.8993	-66.8634	0.104472	0.366086	0.503573	0
520.577	0.044995	26.8866	15.7651	-0.382539	-57.56121	-5.06077	-0.209643	-0.04213	3.83736	6.41215	-0.046512	21.8879	-64.5168	0.238889	0.441931	0.503573	0
281.215	0.081117	11.3759	11.46	-0.290755	-65.04536	-1.3953	-0.500998	-0.08191	1.26339	16.9703	7.52271	-11.8393	-64.2935	0.001991	0.76714	0.11518	0
167.84	0.074535	14.976	12.805	-1.16129	-66.16592	-1.64474	-0.743255	0.041593	6.73641	17.7403	11.3059	-14.4936	-62.0312	-0.000467	0.466163	0.133937	0
72.9499	0.096589	7.72566	10.2545	-4.25104	-54.60551	3.02352	-1.24947	-0.0759926	-5.43212	14.6348	5.36892	-6.82438	-60.7948	0.005306	0.358075	0.175946	0
-0.528404	0.091471	16.4918	11.2968	-2.03751	-69.24289	0.348324	-0.850774	-0.0759926	0.805456	6.08228	2.64451	-8.23621	-52.8886	0.003857	0.245089	0.283	0
447.664	0.074892	14.257	4.6873	-3.5255	-56.07340	2.28905	-1.413	-0.0759926	-3.56593	16.3444	8.50947	-12.234	-60.7552	0.023753	0.371919	0.300536	0
556.419	0.075839	17.0717	6.52237	-0.578709	-68.30387	-2.89872	-0.434372	-0.000703	9.72315	9.46595	7.5401	-9.68379	-40.6765	0.067403	0.038263	0.079008	0
241.554	0.027015	37.8319	13.6771	-0.337889	-34.66777	4.2802	-0.265014	-0.139984	1.71686	17.8212	-2.55595	6.80516	-30.7429	0.950449	0.116672	0.091046	0
411.206	0.027492	37.9467	14.3957	-0.512539	-32.32743	-1.57271	-0.116484	0.008445	-4.39929	29.6781	-35.2944	-5.99729	-52.9877	0.950449	0.110605	0.02276	0
-168.836	0.108072	44.2944	26.5712	-0.0636	-47.83392	-6.30972	-0.069311	-0.031372	-8.01348	41.7451	-28.6935	-18.4543	-73.5343	0.950449	0.09652	0.252322	0
0.324787	0.02102	32.4622	13.9914	-0.077533	-39.52649	-4.22091	-0.231966	-0.005524	7.50353	26.8419	-12.5047	6.80516	-65.1687	0.005276	0.038098	0.058361	0
873.765	0.017657	20.9432	4.40697	-0.64926	-40.21818	-6.51241	-0.123082	-0.028642	3.92157	44.2906	-32.3135	6.80516	-53.5559	-5e-06	0.674244	0.283037	0
479.888	0.0603505	20.9433	5.22041	0.010769	-46.23357	-11.1694	-0.036775	-0.01539	10.7506	41.3729	-27.7535	6.80516	-51.0877	-5e-06	0.461951	0.63725	0
791.184	0.0603505	15.1147	8.78765	-3.38304	-27.88361	0.394004	0.202502	-0.115612	-11.3599	50.6741	-35.1586	-17.1229	-51.6294	2e-06	0.158824	0.0692	0
738.154	0.085071	22.7654	1.93027	-9.47655	-42.58657	-10.3808	1.1611	-0.017867	-15.308	17.8212	-18.707	6.80516	-70.5389	-4e-06	0.456416	0.410169	0
446.821	0.0603505	11.748	11.2881	0.06402	-38.93379	-12.6604	-0.131581	0.011686	3.10519	8.37943	43.7851	0.172411	-49.5339	0.911382	0.040889	0.207806	0
122.687	0.069148	7.29783	9.98848	-12.0184	-66.39378	-32.6522	-1.03418	-0.0759926	-0.523355	-11.1676	58.5192	-7.65342	-60.8647	0.888728	0.105562	0.12166	0
151.644	0.069453	15.3053	17.7919	-0.114286	-77.97027	-30.7399	-0.230426	0.0395	9.84894	-2.92951	-2.55595	-5.41822	-57.447	0.875749	0.0195	0.372905	0
17.4623	0.084999	23.2376	8.69567	0.046297	-84.78578	-33.6154	-0.142276	-0.026719	0.42415	-4.3339	51.4652	-5.3393	-84.6101	0.890918	0.018769	0.410401	0
16.4977	0.069065	14.9039	14.8274	0.050119	-67.00272	-26.2167	-0.23547	0.05651	13.167	14.8219	57.7995	-8.74286	-54.0968	0.936431	0.152958	0.526246	0
414.335	0.059544	24.8447	4.71233	-0.412059	-58.07264	-19.6776	-0.174566	-0.014221	0.773318	18.419	-0.192099	8.51065	-73.0446	0.020386	0.00459	0.020432	0
-5.75536	0.039603	23.3716	16.6922	-0.355533	-84.56642	-22.218	-0.047443	0.054821	22.5529	28.5315	-9.42903	3.13606	-40.7421	0.099061	0.01342	0.054801	0
-0.466971	0.050424	29.2205	-3.41499	0.504605	-84.31266	-22.4079	0.141694	0.078809	20.4962	17.7822	-4.06863	4.38087	-50.5996	0.075566	0.393055	0.352054	0
-3.28451	0.030799	30.4369	-9.82373	-0.399989	-92.24549	-21.886	-0.045294	0.074602	19.6176	31.6481	-12.0796	-3.30423	-54.126	0.156839	0.354934	0.307862	0
-129.93	0.090492	29.7271	9.4901	1.11216	-47.86050	-16.6371	0.078543	-0.079119	-7.35986	13.9648	-2.43844	17.2757	-70.5796	0.011304	0.009495	0.02099	0
-4.98357	0.06804	13.3422	8.3609	-0.376347	-44.46337	-32.5238	-0.382835	-0.048771	-2.14193	-4.56501	23.3976	23.3869	-58.431	0.253999	0.037879	0.503573	0
82.9758	0.06042	55.1646	11.5365	-0.58433	-60.77186	-36.1925	-0.363938	-0.045553	-1.74611	-2.43261	33.9166	10.5073	-64.3175	0.19421	0.005381	0.503573	0
114.688	0.07127	48.136	6.34015	-5.95047	-70.34978	-41.7763	-1.71983	-0.0759926	-5.50494	5.08288	18.4845	18.8283	-75.3729	0.15864	0.5563	0.04092	0
401.97	0.0603505	58.0755	11.1367	-5.07926	-48.26014	-27.9962	-1.16306	-0.0759926	-10.2014	17.8212	-2.55595	21.0643	-63.8554	0.07102	0.0129	0.027213	0
85.8471	0.063422	47.261	3.62539	-0.224077	-74.97960	-40.7412	-0.156138	0.028314	1.04395	-1.48637	25.4061	17.107	-72.7817	0.078982	0.012688	0.765474	0
-13.6055	0.055649	50.2027	11.9059	-2.20477	-72.40310	-38.0683	-0.88161	0.237533	2.00533	2.74608	31.7332	8.74759	-70.5555	0.086944	0.012476	0.503573	0
514.264	0.053114	33.9256	9.46996	0.071206	-77.93089	-15.9324	-0.11482	-0.056504	10.3023	15.2196	-6.36557	-1.04984	-64.3296	-3e-06	0.348969	0.318673	0
-75.216	0.117804	13.3422	8.91162	0.870375	-80.90739	-12.7944	0.243804	0.059405	-17.2503	27.068	-7.12934	11.0702	-74.4289	-1e-06	0.033442	1.04466	0
434.94	0.071054	33.2821	11.6282	0.010793	-67.19902	-16.8601	-0.081509	-0.007935	-5.85057	22.7883	-7.09019	7.0819	-76.3967	-2e-06	0.16086	0.282962	0
354.293	0.081257	26.7278	14.1837	-10.194	-55.82897	-12.714	-3.24994	-0.041582	-3.62234	15.9595	-9.42393	8.09562	-64.3916	-7e-06	0.348969	1.18094	0
42.4946	0.059255	32.7918	10.4093	-3.86506	-75.06332	-11.6904	-1.52659	0.215007	11.6232	14.881	-9.98683	-1.52995	-55.3118	-9e-06	0.577469	0.274338	0
269.306	0.054321	23.5594	12.2117	-3.28582	-69.93470	-11.3753	-1.42992	0.255831	7.09554	17.7508	-9.70458	-0.850375	-61.4579	-4e-06	0.348969	0.470192	0
60.3143	0.054482	12.9552	8.02069	-0.162703	-70.22123	-21.5213	-0.057626	0.022734	11.1658	3.38867	15.8992	25.9198	-51.4678	0.164714	0.189	0.160135	0
-102.913	0.046486	19.8671	5.42735	-7.37649	-75.93349	-23.6199	-1.92504	-0.0759926	-0.577653	18.9381	14.3464	29.9701	-79.463	0.181746	0.154233	0.107967	0
44.5762	0.061733	20.2867	10.3236	0.176881	-72.96537	-20.2454	-0.078014	0.025994	14.0764	10.0346	11.1821	27.3753	-47.8949	0.389464	0.203759	0.20529	0
297.47	0.059865	16.0375	11.7403	0.4411	-71.52591	-21.3887	-0.067651	0.032132	11.3825	8.57807	17.9577	29.4592	-47.5964	0.933443	0.198176	0.238211	0
49.3883	0.104666	18.2002	7.7968	0.597658	-78.60269	-20.2325	0.947449	-0.0759926	-9.39246	29.4693	11.6083	22.4619	-79.3854	0.628496	0.205724	0.103115	0
691.483	0.047452	13.066	14.2185	-7.79912	-68.53888	-24.3747	-2.88071	-0.0759926	-4.53809	18.0369	8.69428	31.3316	-70.2846	0.950449	0.464236	0.189806	0
0	0.067332	19.3465	10.0566	-0.120905	-74.16477	-16.65	-0.07732	-0.0387	5.4991	22.916	-3.09048	0.733232	-76.7355	0.645655	0.200548	0.128104	0
0	0.093558	13.5283	11.7546	-0.360037	-65.82226	-18.3238	-0.19568	0.016158	-1.66013	16.9566	-7.96084	6.53731	-70.218	0.559692	0.223005	0.386141	0
34.638	0.082677	2.68114	12.0515	0.220146	-67.57357	-20.7063	-0.13699	-0.022341	3.50258	10.4294	-20.2892	-2.3724	-63.684	0.757802	0.558908	1.34025	0
203.663	0.015032	7.43108	10.7012	-5.40901	-71.68710	-18.1534	-2.85273	-0.0759926	18.5442	1.01907	-25.396	-4.20422	-56.3806	0.755198	0.653821	0.503573	0
200.355	0.01531	4.9192	10.5299	0.126695	-71.79889	-19.0258	-0.131436	-0.031519	16.5489	1.90138	-25.7717	-6.69962	-58.0042	0.750502	0.649348	0.503573	0
118.043	0.033302	-0.178564	11.5531	-4.43325	-63.16354	-15.6669	-2.40167	-0.147029	14.3974	6.94625	-21.0608	-3.14954	-59.6858	0.798893	0.556319	1.09005	0
359.188	0.056733	14.2297	12.2758	0.080041	-46.94072	-3.41298	-0.16939	-0.053038	10.7744	-3.43649	5.26624	11.3951	-47.1555	0.039608	0.106	0.503573	0
469.727	0.0592345	24.1621	2.8459	-2.57877	-47.31412	-14.8741	-0.998526	-0.0759926	5.37374	16.6984	-3.72568	4.98265	-96.9068	0.373785	0.144259	-0.164096	0
-31.8895	0.061736	9.02448	14.3002	-5.23758	-48.76727	-9.73507	-1.82766	-0.0759926	7.80277	7.46843	-7.94247	2.1745	-57.4541	0.479112	0.058563	0.224018	0
240.897	0.044677	25.6306	6.56827	-0.329065	-49.38143	-5.42859	-0.61502	-0.060524	18.0814	6.07907	0.386598	3.78701	-43.8774	0.277346	0.129328	0.503573	0
281.215	0.051862	11.0536	9.46227	-9.14418	-49.08677	-9.45527	-3.9267	-0.0759926	7.46077	10.7579	-7.29119	6.07645	-59.4478	0.077921	0.166658	1.01242	0
143.786	0.043012	14.7448	10.7208	-8.22796	-51.33624	-7.8183	-3.3283	-0.0759926	6.0713	4.17512	-0.366275	8.98058	-59.4251	0.950449	0.056659	0.148027	0
-19.3235	0.044721	13.3422	-1.19184	-9.65885	-63.23589	4.17285	-3.28434	0.351498	13.7697	8.44427	-26.4505	20.3834	-50.527	0.121304	0.434787	0.467926	0
-9.25699	0.046844	-11.6616	6.49414	-11.0897	-56.16957	3.82721	-3.24039	0.112063	5.08478	13.8659	-21.0498	23.2442	-58.2056	0.135961	0.348969	0.561879	0
359.973	0.047251	-17.6428	9.37854	-3.02956	-49.85806	-0.073921	-1.03418	-0.111705	-11.8111	29.7647	-11.5224	23.1367	-69.987	0.080679	0.228344	0.904191	0
97.6219	0.030206	13.5478	5.63377	-0.469283	-72.04648	4.46249	-0.152683	-0.088321	4.03266	22.2808	-15.7714	13.8314	-70.4415	0.21457	0.003004	1.29125	0
335.429	0.062883	-29.3153	7.20215	-11.5241	-74.43249	9.95771	-1.03418	0.0056	-7.68429	23.2153	-7.72732	27.813	-85.2832	0.111446	0.407644	1.05783	0
163.454	0.045591	11.8093	8.2742	-0.404364	-78.57906	10.782	-0.075858	-0.095087	4.66599	24.0402	-10.8699	26.2251	-79.0865	0.443234	0.348969	0.503573	0
717.282	0.031611	5.45664	16.5865	-3.4926	-41.06270	0.495871	-1.23638	-0.172019	14.4299	31.6878	-58.225	6.80516	-45.5591	2e-06	0.348969	0.22861	0
668.806	0.036182	0.27401	6.71996	-0.022611	-30.34878	3.6513	-0.133945	-0.005848	2.40083	40.3588	-53.4855	6.80516	-48.297	-5e-06	0.348969	0.096264	0
62.2828	0.038155	-1.79933	11.4976	-0.18743	-33.32238	2.78587	-0.139777	-0.01316	4.89309	42.7079	-50.7067	6.80516	-43.3158	-8e-06	0.348969	0.209558	0
254.72	0.029577	15.9962	20.976	-4.13448	-54.78756	-2.63493	-1.0947	-0.274673	4.87153	46.7692	-52.7353	6.80516	-69.2213	3e-06	0.348969	0.105708	0
661.239	0.033711	6.54994	19.1462	-2.35003	-52.79375	-1.96218	-0.820415	-0.150419	9.01294	44.7589	-66.8948	-19.527	-57.3087	8e-06	0.348969	0.968379	0
281.215	0.066603	-5.11517	22.1012	0.257174	-44.94691	-1.66964	-0.017779	0.00646	-5.55003	45.1927	-32.8792	-13.761	-73.9288	4e-06	0.7946	1.41022	0
19.33	0.057335	33.1772	14.4031	0.014443	-54.51426	-15.6667	-0.23017	-0.081625	1.476	11.6116	4.20126	-7.45567	-59.486	0.347642	0.317393	0.503573	0
10.6658	0.054324	56.5399	17.2253	0.864818	-57.76707	-15.2818	-0.106885	-0.052882	1.49095	12.168	4.04807	-5.98492	-62.1124	0.26329	0.41832	0.06724	0
107.629	0.074881	40.6938	0.282234	-0.31128	-43.16113	-14.8354	-0.071896	-0.01782	-14.2612	11.6292	4.07972	-4.82916	-66.5884	0.595038	0.258103	0.067519	0
716.768	0.098766	43.2067	5.3283	-0.143471	-50.12244	-17.8993	-0.061482	0.003727	-9.19145	11.9303	3.62195	-5.05412	-70.1945	0.174186	0.717812	1.24531	0
-80.4388	0.0603505	10.2182	2.77985	1.43189	-56.24567	-14.544	0.254362	-0.022905	5.29245	34.4511	14.3266	-10.5139	-74.4109	0.058946	0.16223	1.472	0
18.5712	0.010484	12.5	14.0409	0.294781	-51.47961	-17.2352	-0.128421	0.064526	-3.85691	18.7622	10.6255	-18.773	-57.8485	0.186964	0.30291	0.503573	0
760.769	0.059094	28.7416	5.19111	-1.31341	-77.30525	-6.28348	0.043517	0.218245	19.7682	15.1181	0.626769	13.9131	-61.9114	0.19051	0.051226	0.168151	0
347.807	0.093162	29.6127	-0.609907	-2.54347	-62.51448	-10.427	0.88353	-0.0759926	9.52269	17.8869	3.37602	20.0413	-85.4535	0.03668	0.016389	0.068104	0
527.451	0.078492	26.9581	-2.95766	-4.12319	-70.90883	-12.0795	-0.123876	-0.0759926	9.2735	14.6056	4.09434	19.9199	-90.7064	0.035175	0.023954	0.239774	0
281.215	0.040215	9.21944	5.39209	-8.36236	-61.56579	-12.0328	-2.90576	-0.0759926	4.22463	4.45798	1.00257	22.5303	-64.8686	0.124449	0.052709	0.495655	0
580.327	0.058056	26.0456	7.41459	-3.03253	-88.35893	-9.12055	-1.19849	-0.0759926	11.1139	15.8022	9.94837	21.2329	-77.9795	0.105751	0.120615	1.2703	0
233.171	0.063819	25.2898	5.74432	-0.228246	-67.53614	-4.52914	-0.131224	0.052899	20.1746	10.359	7.93978	16.3789	-52.143	0.241429	0.388558	0.705156	0
-1.22881	0.061711	14.1953	5.72729	-1.75324	-62.65677	-16.9112	-1.12461	0.313118	7.85409	10.4208	14.9419	30.2577	-58.9156	0.207979	0.474688	0.900596	0
669.126	0.083068	9.81415	2.46103	-5.77986	-62.04708	-15.4414	-2.70343	-0.0759926	-2.80883	16.3414	5.04933	6.80516	-75.4033	0.17453	0.560819	1.09604	0
26.7508	0.075914	24.1816	13.5837	0.048889	-84.48060	-15.5362	-0.136841	-0.033018	11.8972	10.8817	19.2179	22.9013	-68.1342	0.14108	0.646949	1.29148	0
-3.96008	0.051339	10.1175	5.10408	-1.91268	-64.12830	-17.7628	-1.06772	-0.0759926	-2.74756	15.2162	6.86862	6.80516	-63.3521	0.128977	0.249236	0.503573	0
157.243	0.065889	12.0418	4.27888	-0.128201	-82.69676	-18.6059	-0.192661	-0.01219	11.1026	1.49132	13.1002	26.5546	-70.6948	0.18164	0.067625	0.02962	0
55.1979	0.116362	24.2291	12.8326	0.159512	-89.29153	-14.9587	0.010221	0.010998	4.74185	17.8212	-2.55595	19.9668	-75.7033	0.058666	0.028845	0.696623	0
293.373	0.091059	24.6414	11.29	-6.68208	-91.82731	-19.8625	-0.738543	0.365144	-3.04853	16.2883	9.9487	26.5069	-97.1902	0.679408	0.907393	0.177178	0
9.03615	0.060065	8.22625	12.3689	1.01956	-39.36071	-7.92482	-0.258836	-0.023147	-3.8427	3.76561	1.84059	26.9733	-61.2453	0.101468	0.115134	0.098524	0
197.093	0.029399	16.7537	21.3809	-6.28337	-67.57695	-14.6068	-2.74744	-0.38794	19.8939	9.86831	2.57811	13.5621	-58.65	0.12255	0.505372	0.104269	0
302.249	0.072139	23.1229	14.5935	0.217488	-63.73526	-15.8149	-0.084578	-0.005476	-3.71447	12.9578	0.177719	13.2913	-74.1858	0.09681	0.148417	0.129397	0
437.953	0.069128	24.8132	18.8983	-6.41948	-83.75146	-17.4758	-2.75174	-0.054031	3.94258	13.507	5.1332	18.7208	-83.5449	0.469712	0.419432	0.076363	0
241.549	0.063046	13.2263	20.2235	-6.59697	-60.04967	-13.5983	-2.82586	0.256055	7.01018	5.7541	2.87502	17.8534	-61.0997	0.324785	0.336487	0.0021457	0
511.541	0.078352	48.4529	3.50441	-0.030996	-55.25567	-13.9056	0.055825	0.008965	10.7071	-4.21042	35.4769	21.5224	-63.7644	-1e-06	0.195889	0.519239	0
238.18	0.111936	8.27336	5.27996	0.290326	-55.82537	-15.9853	-0.169927	0.04345	-7.56739	7.70815	6.34433	31.5015	-67.1924	3e-06	0.00883	0.117704	0
281.215	0.1141	39.9562	3.26347	0.230573	-56.39192	-18.7177	-0.113933	0.030068	-7.27063	-0.535959	1.54823	33.8995	-56.0812	0	0.138623	0.162171	0
281.215	0.099832	13.3422	7.90347	-6.73874	-54.76620	-20.9494	-2.16874	-0.0759926	-6.08298	7.23777	3.99796	6.80516	-64.4368	-6e-06	0.104529	0.19207	0
850.713	0.068625	13.3422	5.13629	-5.18358	-64.53247	-23.6478	-2.31436	-0.0759926	-0.385163	0.300871	15.7731	31.1235	-67.3142	-5e-06	0.0635	0.081985	0
670.821	0.075959	53.7498	2.33361	-3.6839	-48.76402	-20.6863	-1.226	0.08883	-6.1478	0.003033	4.10114	6.80516	-58.5684	0	0.201675	0.28351	0
281.215	0.063154	0.221793	12.9524	-0.202373	-44.28720	-8.25429	-0.128628	-0.108868	8.5688	-3.55839	19.1933	34.9117	-47.5874	0.299793	0.246831	0.056911	0
281.215	0.056633	-0.991473	15.2299	-5.47448	-53.15273	-4.85642	-2.20042	-0.214026	13.9122	-3.94472	24.2159	26.7576	-50.0264	0.427084	0.48257	0.077283	0
277.184	0.061697	13.5117	19.019	-5.08646	-43.31791	-7.12259	-1.93558	-0.0759926	4.8619	2.7072	9.32221	31.5038	-50.9222	0.132481	0.080718	0.037017	0
281.215	0.062709	-4.7418	15.8858	-4.6597	-40.29718	-8.08054	-1.81429	-0.0759926	6.61679	-3.71212	16.3207	31.4248	-50.9053	0.343542	0.203743	0.138418	0
281.215	0.060583	6.0944	15.1585	0.304186	-41.47327	-8.89827	-0.096375	-0.031114	3.13709	2.84752	14.8682	29.2767	-52.3931	0.171577	0.10533	0.048122	0
281.215	0.080803	5.53486	16.6573	0.671	-47.39849	-3.96674	0.047474	-0.081596	11.6763	2.37937	18.3022	30.94	-44.126	0.431294	0.249586	0.263678	0
362.708	0.058044	36.5492	7.49636	-0.011738	-70.45286	-37.2028	-0.060008	-0.001318	12.1207	-8.08022	-20.569	27.3073	-41.5161	0.532837	0.897645	0.503573	0
510.616	0.093766	33.8254	8.52307	0.169788	-75.30195	-40.6279	-0.034854	-0.068395	0.088112	-6.44573	-18.8997	34.8513	-53.8875	0.875381	0.348969	0.503573	0
108.828	0.043992	32.2067	8.24976	0.128389	-88.64513	-33.9828	-0.166505	-0.089156	15.3007	16.6875	-19.1388	20.6737	-56.7009	0.279586	0.249524	1.43784	0
409	0.0603505	30.354	10.4338	-0.31667	-61.57639	-38.2678	-0.084241	-0.015203	-8.19405	17.8212	-2.55595	32.3764	-61.5214	0.146462	0.576537	1.11638	0
557.792	0.081272	33.448	13.7929	-11.5487	-73.17674	-40.9163	-1.03418	-0.0759926	2.86273	-9.31773	-17.2793	6.80516	-49.3867	0.996725	0.807574	1.19296	0
790.611	0.065988	25.3421	5.60814	-9.85469	-70.18974	5.5452	-4.03358	-0.0759926	9.30198	16.4058	-6.33896	4.69666	-74.4742	0.366718	0.348969	0.874278	0
553.103	0.069788	21.9383	10.0215	-5.16517	-66.36885	2.39112	-2.13636	0.286802	9.97657	16.4514	-10.2128	1.48833	-58.7709	0.068122	0.186916	0.903043	0
703.524	0.079676	25.4862	8.99223	-0.181599	-68.66306	5.06462	-0.118203	-0.019969	6.32461	22.186	-5.8865	2.9817	-70.3202	0.273263	0.395762	0.744131	0
719.829	0.084431	32.8703	13.722	-0.292496	-59.39022	6.45083	-0.122407	0.002151	-3.78782	25.1119	-4.71034	13.5175	-81.5089	0.510895	0.348969	0.808114	0
205.667	0.063166	22.4964	16.0173	0.271181	-56.66323	4.41732	-0.291523	-0.081429	17.9852	16.3426	-12.7658	1.71145	-57.0071	0.924048	0.348969	0.870528	0
-233.959	0.106746	37.1641	14.6892	3.97152	-66.28820	9.55365	-1.03418	-0.0759926	-2.00887	29.7022	-5.70655	11.8045	-99.833	0.029627	0.274471	0.775448	0
0.504839	0.030849	21.5808	19.1651	0.010606	-52.38203	-57.3028	-0.166565	-0.06858	11.8258	17.8212	-67.4336	1.67622	-50.6154	0.1007	0.625665	0.243154	0
476.438	0.051237	29.8654	23.878	-6.63886	-65.32184	-69.7909	-3.23199	-0.047459	-11.4092	55.8084	-37.9979	10.7379	-80.41	0.172047	0.191471	0.29138	0
400.642	0.038099	35.5041	21.4979	-0.084604	-64.61736	-67.5151	-0.138781	-0.021663	-8.25303	52.0803	-45.8602	11.5364	-73.8145	0.122211	0.280458	0.18906	0
199.618	0.030974	30.3256	19.2708	-3.37347	-64.54150	-71.2474	-1.8211	-0.157417	6.21573	17.8212	-63.2263	0.449678	-64.3384	0.794685	0.346242	0.028925	0
539.92	0.026631	32.922	24.3277	-7.73343	-63.63079	-63.5845	-3.65488	-0.0759926	-6.4306	42.3827	-51.9836	12.9775	-71.4241	0.614118	0.171873	0.02834	0
451.88	0.052771	42.31	19.8452	0.136115	-79.92345	-70.5518	-0.062111	0.006418	-3.73035	17.8212	-55.7869	4.39062	-81.3884	0.242408	0.196688	0.015876	0
253.294	0.041093	52.9985	10.0422	-3.96902	-76.55478	-36.5435	-1.76014	-0.207821	10.9662	33.6374	-34.9576	8.08958	-67.747	0.320547	0.084004	0.532246	1
472.026	0.056503	40.9761	5.29255	-6.23888	-60.02681	-37.3351	-2.81669	-0.023899	-2.20029	28.8407	-23.8558	9.20725	-69.4902	0.189791	0.630491	0.150885	1
780.769	0.043344	47.4883	7.40191	-8.4665	-57.00865	-36.6221	-3.82607	-0.0759926	-1.86438	29.8369	-17.7859	7.92729	-66.3476	0.136031	0.693	0.63185	1
-1.16995	0.044376	46.7441	3.76471	0.079904	-62.14716	-32.006	-0.083315	-0.007116	4.71402	39.3025	-26.365	-0.367473	-61.4725	0.14624	0.41373	0.139003	1
662.576	0.049241	49.9478	6.98876	-0.034611	-49.88465	-38.2015	-0.005292	-0.002459	-3.33253	24.3887	-22.1521	7.66742	-64.9094	0.823465	0.161879	0.187827	1
67.0192	0.037919	46.1008	1.74877	0.113306	-66.74603	-36.6768	-0.094269	-0.016646	8.22462	30.4401	-35.5275	4.10081	-50.0436	0.801304	0.128659	0.273667	1
263.864	0.083664	30.1392	6.85079	0.22618	-54.11249	-13.3735	-0.051843	-0.002981	5.59606	18.2238	-26.6762	12.5909	-87.7193	0.164849	0.028419	0.081837	0
-39.0941	0.049762	23.2763	11.3684	0.056157	-81.86848	-8.27608	-0.020987	-0.044316	19.3677	24.7515	-4.16696	7.2277	-73.899	0.042956	0.027129	0.659072	0
0.907329	0.05486	12.7132	10.2457	0.309426	-43.32248	-7.46225	0.130211	-0.033248	15.0345	21.0159	-9.63003	11.6467	-73.5187	0.051799	0.58689	1.38669	0
281.215	0.067138	16.9391	4.92611	-10.3206	-72.66583	-15.856	-3.8974	-0.0759926	0.97123	13.9697	-13.7603	19.9768	-80.5817	0.012974	0.051974	0.083413	0
-298.503	0.111843	18.2123	8.07649	1.28831	-51.11422	-3.44461	0.092984	0.085853	-7.44713	34.3722	-12.0895	25.5294	-88.0865	0.106333	0.178458	0.07606	0
141.549	0.059005	19.6252	11.9818	-0.074755	-85.14849	-10.019	-0.019464	-0.034887	19.1106	17.7115	-6.56989	15.8097	-65.7651	0.025785	0.039914	0.294861	0
517.123	0.079962	22.6862	1.50429	-12.5351	-79.24324	-18.0614	-3.7524	-0.0759926	-0.540806	32.1387	13.848	16.3768	-86.5671	0.100086	0.060165	0.070933	0
424.565	0.059173	24.3543	24.1224	-12.7734	-76.80712	-20.0119	-1.03418	-0.0759926	-0.942365	19.6159	14.1189	15.7197	-81.3425	0.030044	0.025565	0.205794	0
486.028	0.040957	24.5813	23.5949	-11.3827	-79.00046	-17.3015	-3.55484	-0.0759926	3.36553	16.6896	23.5735	16.8493	-77.9557	0.083567	0.074537	0.192158	0
45.1827	0.054288	18.4593	21.3584	-0.232995	-76.70278	-15.0392	-0.05351	-0.05837	9.63435	4.80044	14.194	13.6198	-57.7753	0.281825	0.075284	0.503573	0
117.367	0.055796	20.7111	29.6819	-3.04971	-71.92851	-16.0673	-1.40962	-0.048897	13.3061	12.425	15.806	6.84888	-54.2667	0.092485	0.116916	0.774916	0
219.355	0.053392	19.7186	27.9283	-0.449004	-68.52735	-13.8938	-0.141894	-0.034021	15.469	15.1842	14.0862	23.7616	-51.0312	0.04953	0.122181	1.06761	0
-0.196184	0.076698	-14.0007	17.2746	-1.47025	-62.91925	-30.0875	-1.14383	-0.331521	17.7676	15.2192	41.8651	9.17595	-59.3988	0.049853	0.348969	0.648203	0
227.356	0.06881	-15.6644	19.8318	0.388974	-72.61294	-29.4791	-0.191116	-0.072263	16.9739	18.9743	38.8833	8.64739	-63.7983	0.119526	0.689202	0.78349	0
215.66	0.110321	13.3422	24.8172	0.315374	-70.45182	-37.8325	-0.045488	0.031116	-2.38343	21.5495	45.154	15.7232	-81.6398	0.288803	0.17818	0.769822	0
354.752	0.075299	-29.0972	23.6742	-6.90406	-73.24188	-36.9617	-2.61594	-0.0759926	13.1896	20.1801	44.9022	9.93539	-65.2603	0.020118	0.019246	0.751106	0
42.2912	0.072879	13.3422	20.0737	0.439993	-52.63428	-26.0261	-0.211136	-0.090893	5.10107	17.6801	36.6966	12.0525	-66.7817	0.135179	0.134142	0.673007	0
405.741	0.0603505	13.3422	20.4792	-12.0325	-70.58985	-40.1813	-2.12756	-0.0759926	3.84412	15.9	20.1891	15.5109	-80.3201	0.700917	0.210866	0.552147	0
-0.297062	0.038385	18.1626	14.9523	-2.06277	-79.36376	-27.3712	0.248763	-0.1672	20.8498	-22.4635	-60.6307	-3.28225	-62.5131	0.211124	0.047091	0.052357	0
345.808	0.029121	11.4984	12.0286	-3.39137	-66.17218	-40.0221	-0.492031	-0.481824	18.3424	17.8212	-56.9722	-3.909	-64.5815	0.621721	0.225149	0.978009	0
326.077	0.028815	13.3422	17.9292	-11.2751	-64.62360	-12.3201	-1.03418	-0.0759926	4.9527	-20.8971	-45.0653	1.04663	-66.6422	0.310955	0.040647	0.371416	0
539.577	0.027779	9.9688	12.5576	-5.11159	-68.20764	-36.0141	-0.464196	-0.0759926	17.5183	17.8212	-59.851	-5.68114	-69.5999	0.839295	0.348969	0.632512	0
72.7831	0.025528	7.31757	16.1525	-6.16673	-84.96107	-33.2024	-0.535174	-0.0759926	8.68035	17.8212	-67.9597	-1.34382	-79.3688	0.240665	0.381576	0.643592	0
757.276	0.055152	50.6714	10.1618	-5.43712	-73.32640	-17.19	-0.766546	-0.0759926	26.5155	17.8212	-69.6329	-0.070348	-98.3196	0.25835	0.227814	0.726319	0
323.01	0.06469	11.0238	39.404	-7.3959	-81.14793	-50.1631	-2.46208	0.339935	-1.10314	21.6896	39.1922	9.83277	-83.0535	0.076473	0.13472	0.044999	0
369.772	0.048643	15.4617	38.6733	-6.50177	-84.82283	-47.0628	-1.8621	-0.0759926	1.23612	45.776	64.8389	8.77636	-79.2735	0.146518	0.192331	0.012963	0
44.9983	0.050737	9.88937	26.4304	-1.77764	-64.78537	-28.7265	-0.807708	-0.561024	11.842	14.4814	3.1453	-3.48531	-57.5987	0.404678	0.078023	0.043068	0
369.587	0.050333	5.55963	27.4466	-8.71252	-63.00492	-30.563	-3.59307	-0.0759926	2.21598	28.1183	48.5872	4.70621	-58.4726	0.144374	0.047827	0.105918	0
-82.6264	0.0603505	30.1569	30.8208	1.08009	-55.20067	18.2762	0.106144	0.121907	-4.145	21.4726	27.3346	31.3987	-59.3289	0.170774	0.071362	0.22946	0
82.9532	0.073306	13.3422	20.8549	-6.94487	-64.04911	-17.19	-2.16036	-0.0759926	8.41217	33.4305	35.6147	22.2683	-88.4057	0.299215	0.40481	0.865018	0
765.825	0.054636	13.3422	24.7201	-3.81597	-71.94914	-17.19	-0.190449	-0.0759926	20.1974	34.6492	42.5549	22.8768	-66.8007	0.08816	0.1978	0.038743	0
347.674	0.057368	13.3422	21.9497	-4.86609	-63.32805	-17.19	-0.286235	-0.0759926	17.9605	31.2328	45.5788	21.0166	-61.0911	0.128771	0.06171	0.073629	0
241.171	0.060926	13.3422	29.3626	0.076921	-72.59159	-17.19	-0.065183	-0.026595	11.884	30.6827	31.4411	21.3059	-87.1976	0.111305	0.125442	0.048435	0
203.342	0.057076	13.3422	26.1034	-6.36931	-61.37234	-17.19	-0.380486	-0.0759926	14.5756	30.7347	48.4651	21.6749	-64.9485	0.424988	0.377609	0.045168	0
81.9697	0.076892	11.8557	35.8762	0.9686	-66.33614	-17.811	0.020451	0.159628	-1.5524	38.7987	-6.89073	8.93094	-87.8887	0.301527	0.022529	0.132355	0
34.6439	0.107358	7.61279	28.5075	1.0492	-52.45050	-12.9008	0.096897	0.161954	-0.531139	36.3284	-8.76572	6.61998	-84.072	0.192818	0.056025	0.040526	0
-0.357122	0.026863	10.6193	18.8886	-0.503861	-80.67613	-24.8075	-0.239271	-0.246921	19.7028	30.0998	-9.64149	1.75236	-63.5671	0.082702	0.227865	0.035497	0
110.933	0.037073	11.7766	19.7683	-0.273945	-80.26207	-37.2995	-0.21189	-0.115138	19.7392	33.3303	-11.7659	0.680459	-63.9862	0.18776	0.042067	0.053702	0
294.384	0.065219	15.8367	37.7716	0.958007	-54.86547	-20.9468	0.032123	0.09081	0.49247	30.6166	-13.4819	8.95976	-80.5256	0.294423	0.065826	0.033848	0
207.234	0.03808	14.6166	26.5642	0.270886	-85.48661	-27.3004	-0.056078	0.012709	12.2448	28.9435	-2.82154	0.552587	-73.7407	0.061395	0.003396	0.024681	0
171.071	0.036904	13.3422	7.01176	0.182213	-64.62360	-40.5398	-0.102593	-0.0077445	10.8546	17.5584	-34.857	2.57897	-51.9389	0.134896	0.036475	0.184384	0
-10.9581	0.025582	8.79589	15.8993	0.09354	-76.86924	11.2894	-0.149107	-0.028198	1.56298	30.5752	-23.3166	2.30909	-71.6905	0.235514	0.00011	0.716375	0
294.707	0.059838	16.8923	19.3731	-0.014675	-82.22457	-17.19	-0.129436	-0.041159	-5.55082	28.6674	-16.3288	10.3711	-90.5737	0.043736	0.113044	0.946094	0
83.1178	0.029724	-20.1088	6.3007	0.403863	-67.10601	25.8468	-0.167053	0.031412	7.30418	32.0411	-33.3199	0.167212	-63.5265	0.142122	0.044439	0.338432	0
379.144	0.062115	13.3422	9.99662	-3.02956	-78.56853	-17.19	-1.03418	-0.0759926	-8.32982	28.0091	-11.2712	4.363	-90.7252	0.437664	0.024827	0.677137	0
461.924	0.069542	19.5826	22.4826	-0.03154	-78.77696	-17.191	-0.115209	-0.033016	4.84006	24.4601	3.05387	10.9863	-80.397	0.333452	0.102334	0.054006	0
266.272	0.001878	8.18943	24.1381	-6.46648	-78.34175	-18.1466	-2.83476	-0.0759926	17.9273	17.8212	-58.4652	4.96113	-59.7586	0.506926	0.463892	0.635312	0
668.456	0.039585	-9.85645	19.7505	-10.7069	-61.90706	-24.1936	-1.03418	-0.0759926	9.73125	17.8212	-49.8166	10.1213	-64.7742	0.574566	0.539714	0.01977	0
535.313	0.042277	-15.1691	17.8591	-8.11402	-63.18589	-30.653	-3.9305	-0.0759926	10.2457	-21.4913	-53.8143	9.89981	-76.8851	0.771552	0.131256	0.352325	0
136.699	0.079965	-3.94517	16.7587	0.33562	-62.22631	-33.6973	0.201604	0.082186	11.092	17.8212	24.4034	0.363827	-62.2345	0.000849	0.30819	0.366554	0
-3.52961	0.049833	-28.7959	19.1233	0.167827	-52.81296	-17.19	0.069669	0.014354	6.88517	-23.4786	-2.49359	-0.16385	-67.8827	0.000899	0.020613	0.107612	0
227.079	0.052678	13.3422	18.8009	-0.055946	-96.66438	-72.2402	-0.105964	0.028263	1.36266	17.8212	-27.214	13.0964	-73.2558	0.000849	0.09071	0.043767	0
257.078	0.089312	13.3422	20.5609	-10.2102	-64.62360	-28.8158	-0.239421	-0.595372	-6.06418	17.8212	-54.7616	13.8865	-60.7985	6.3e-05	0.23345	0.037837	0
271.45	0.065264	13.3422	15.6717	-6.66106	-23.67759	-39.3195	-0.482542	-0.0759926	-6.44644	17.8212	-42.4905	13.6749	-56.1573	0.001166	0.498284	0.467261	0
133.145	0.050918	41.7467	1.46977	-3.29051	-49.32338	-8.92124	-0.325966	-0.605109	14.5888	5.35893	-2.01101	10.3656	-55.5838	0.516356	0.114324	0.663243	0
281.215	0.056733	14.2297	12.2758	0.080041	-46.94072	-3.41298	-0.16939	-0.053038	10.7744	-3.43649	5.26624	11.3951	-47.1555	0.230438	0.064773	0.503573	0
317.382	0.023059	17.7202	12.1097	-0.51479	-66.98699	-9.73506	-0.334543	-0.0144765	22.6937	16.2058	-2.36929	-1.06505	-45.4255	0.032634	0.07261	0.578836	0
-10.4075	0.036661	21.2107	11.9435	-1.10962	-87.03326	-16.0571	-0.499696	0.024085	23.5055	16.9835	3.85309	6.26118	-65.7774	0.950449	0.103854	0.644289	0
544.453	0.044813	22.1201	16.288	-0.14299	-60.14733	-8.98655	-0.137623	-0.038077	10.3925	13.7628	3.52143	11.0435	-77.0717	0.489673	0.08725	0.789884	0
51.9826	0.095898	-14.7225	22.5576	-5.74232	-38.89092	-17.19	-2.26634	-0.0759926	6.33845	10.8567	15.4426	13.5351	-58.1737	0.022667	0.728154	0.491444	0
152.492	0.076478	-20.3392	22.7455	-3.31684	-65.59424	35.4374	-0.634912	-0.0759926	13.1285	6.62619	36.9885	4.89461	-53.8764	0.022689	0.140393	0.00528	0
45.8046	0.063386	13.3422	24.1979	-2.0728	-60.10617	-17.19	-0.362343	-0.0759926	12.3639	14.0334	15.98	5.28591	-50.1878	0.029942	0.588868	0.667441	0
142.523	0.090702	53.384	18.7755	-6.24628	-89.33206	0.528866	-1.61051	-0.0759926	8.84183	16.1254	22.2155	21.4576	-85.585	0.001092	0.126129	0.20008	0
141.152	0.080199	-22.225	24.2449	-4.54298	-80.31451	-17.19	-1.08308	-0.571307	13.2695	17.142	42.5863	9.46523	-74.4202	0.036361	0.086622	0.091689	0
330.75	0.05146	49.7255	25.6362	-13.4727	-63.95478	24.95	-3.55297	-0.0759926	-1.20647	4.70892	18.0007	21.094	-63.4156	0.034455	0.410862	0.59651	0
300.762	0.060435	-11.3754	22.6706	-2.84677	-60.50283	-46.0725	-1.90391	-0.448661	-0.236145	3.53391	-2.55126	11.2278	-52.803	0.722079	0.313208	0.0819343	0
795.512	0.051484	19.386	26.2552	-0.274692	-84.19171	-66.3599	-0.13441	-0.12633	2.90894	22.9018	4.19247	14.968	-86.4839	0.327026	0.348969	0.503573	0
707.592	0.061225	6.99052	26.0132	-3.98282	-90.71183	-37.5888	-0.95233	-0.0759926	12.0972	18.3688	5.38178	10.8866	-80.3203	0.605975	0.553248	0.503573	0
281.215	0.052953	-7.64367	28.7354	-0.171366	-85.24081	-46.3591	-0.173679	-0.018872	7.88424	17.1298	7.9782	15.7099	-86.7397	0.328749	0.515493	1.39389	0
121.489	0.076702	2.67112	12.0762	-1.63854	-65.52708	-22.5292	-0.909504	-0.221846	13.3222	7.80802	-32.9026	3.68513	-55.2663	0.051524	0.477739	0.867295	0
-21.8446	0.039193	14.2135	23.2063	-0.047281	-97.04287	-11.0108	-0.044327	-0.042727	19.1149	22.2018	-24.7405	1.10423	-73.8543	0.268067	0.099186	0.552917	0
270.337	0.044944	7.14085	21.5046	0.317004	-87.87149	-15.8001	0.12125	0.038917	16.7962	17.2377	-43.47	1.60184	-72.5952	0.308373	0.333713	0.585527	0
675.945	0.054316	0.933598	16.8285	-3.02956	-79.45254	-49.1416	-1.03418	-0.453018	3.2208	1.59399	-52.4632	11.0979	-78.5671	0.082049	0.168051	0.207868	0
-166.859	0.103459	-0.178284	17.8858	1.30102	-85.48751	-19.9448	0.056555	0.260286	-1.86323	37.225	-59.562	15.2689	-85.7291	0.766546	0.136485	0.090888	0
79.2105	0.045053	11.334	23.7368	-0.206051	-89.65190	-17.5586	-0.059589	-0.057092	20.0907	10.9516	-54.8125	2.37612	-64.5698	0.216388	0.305092	0.528587	0
395.97	0.041911	9.8865	30.4639	-0.291517	-60.19435	7.31387	-0.132185	-0.041085	0.954011	10.7769	-52.9865	1.70557	-56.2201	0.034452	0.138659	0.766384	0
365.564	0.027037	21.2769	32.0771	-3.72466	-76.84945	5.21516	-1.83452	-0.0759926	9.94743	-2.30949	-69.1135	1.74436	-67.2441	0.000651	0.807945	0.589826	0
803.307	0.065237	22.6081	30.0791	-9.81618	-75.98054	-11.4055	-3.2853	-0.0759926	3.11428	17.8212	52.7468	4.19614	-76.2125	0.001629	0.503003	0.018866	0
262.958	0.034948	3.08271	19.8718	-0.393435	-59.63791	-1.71871	-0.287724	-0.131748	6.45788	15.497	-55.2947	-1.52691	-57.9222	0.022689	0.057364	0.071755	0
150.517	0.066032	10.43	26.2174	-1.72584	-61.44788	21.3219	-0.9314	-0.461001	5.1818	24.3954	-42.3138	-1.69229	-70.3766	0.007345	0.087147	0.116178	0
273.528	0.032092	50.1594	24.7292	0.765814	-77.52591	-17.19	-0.060748	0.090179	0.639403	17.8212	-62.1518	8.80844	-71.3259	0.036694	0.037688	0.304242	0
0.655647	0.028272	2.37382	20.1816	-0.352657	-58.25589	-67.6988	-0.194291	-0.242436	10.6083	17.8212	-71.1316	5.0945	-52.8679	0.206325	0.051327	0.081606	0
524.084	0.037288	59.0818	34.1887	-4.90195	-83.12910	-17.19	-1.67331	-0.0759926	-4.88891	17.8212	-65.747	21.0379	-80.9464	0.133084	0.086864	0.031607	0
160.449	0.043777	56.1364	26.5046	-2.65974	-79.62683	-17.19	-0.741027	-0.0759926	0.314719	17.8212	-68.9966	13.7467	-80.6035	0.146449	0.102586	0.034215	0
324.453	0.035428	57.1567	30.5129	-0.127282	-67.17465	-17.19	-0.215676	-0.045273	-8.6415	17.8212	-58.2829	31.6967	-72.7622	0.353921	0.312712	0.022111	0
687.62	0.024533	56.2772	32.1847	-9.6291	-64.61451	-17.19	-3.18311	-0.0759926	-7.72277	17.8212	-63.7598	6.80516	-71.4115	0.203345	0.096869	0.079379	0
376.149	0.0603505	36.3196	32.2447	0.185563	-47.84362	-17.19	0.004072	0.061544	-8.10972	3.41433	37.7849	6.99583	-58.2613	0.443097	0.404028	0.512616	0
126.202	0.095122	43.2282	26.3879	0.215974	-94.70633	-17.19	-0.0513	-0.023684	-2.15849	23.9914	42.3252	1.06156	-99.801	0.484691	0.041815	0.039435	0
172.496	0.091645	52.2819	25.9609	-0.202868	-72.77302	-17.19	-0.186628	-0.092957	-5.12153	-2.76062	50.561	4.77922	-76.4835	0.309234	0.302335	0.030325	0
95.7551	0.073794	-5.33654	20.1879	-5.00408	-68.90625	-61.2256	-1.70054	-0.0759926	7.11382	-13.3497	55.6115	0.345462	-53.4863	0.700082	0.755162	0.32577	0
19.5734	0.075628	1.08273	29.7907	-2.17255	-75.47407	-61.0401	-0.405646	-0.494978	7.0996	1.81156	46.419	0.148746	-52.4988	0.464925	0.66517	0.212567	0
115.207	0.045103	-12.7499	28.3772	0.205523	-64.62360	-17.19	-0.010464	-0.027951	4.07714	24.6394	-34.392	6.5549	-47.3525	0.601804	0.054678	0.042716	0
15.7883	0.043895	13.3422	22.2237	-1.366	-49.13117	-17.19	0.054114	-0.371944	12.0396	1.48091	64.0395	3.10394	-66.1881	0.942909	0.637518	0.331637	0
190.076	0.039104	13.3422	21.1322	-3.98579	-40.05061	-17.19	0.222567	-0.0759926	13.7275	17.8212	-2.55595	4.6074	-67.3881	0.646949	0.667859	0.37779	0
41.8542	0.038018	13.3422	21.7384	-1.5591	-51.54821	-17.19	0.223704	-0.47909	11.0793	14.5668	62.1127	3.61849	-67.4669	0.795084	0.520743	0.212736	0
-160.313	0.093202	13.3894	21.5567	-1.02401	-66.88776	-3.48242	-0.551737	0.03924	14.3187	11.6271	1.57281	6.64849	-58.6922	0.308261	0.348969	0.42903	0
459.386	0.072009	0.94319	22.0672	-1.43575	-54.92095	-3.41603	-1.01022	-0.177057	10.1931	2.60062	-3.11153	7.78222	-56.4359	0.038344	0.293636	0.472848	0
45.514	0.066346	1.99856	16.2863	-0.529276	-52.55684	-14.5998	-0.845912	-0.101967	12.279	0.65991	8.0058	4.6359	-49.096	0.993204	0.229604	0.149655	0
813.812	0.089881	8.87941	22.972	-1.62051	-67.35873	3.05473	-0.849339	0.141943	8.58318	5.6592	4.01117	8.29096	-59.0244	0.000002	0.126483	0.0044	0
281.215	0.09492	13.3422	22.6998	-11.8093	-60.44977	-17.19	-2.51335	-0.0759926	5.91197	13.6556	-3.55799	13.6517	-76.9619	0.697895	0.348969	0.158068	0
281.215	0.0458	40.7296	21.5182	-8.94437	-47.15515	-75.3117	-1.98476	-0.0759926	-10.1027	36.2858	-25.9024	15.7573	-72.8814	0.416342	0.30377	0.857621	1
174.407	0.043908	10.1436	30.1977	-3.54557	-74.91115	-39.4534	-1.40413	-0.0759926	-2.15259	36.7045	-33.0177	11.3566	-63.9107	0.207625	0.122259	0.318864	1
-20.1723	0.119903	45.5347	27.0242	-0.597285	-36.36514	-56.9814	-0.432297	-0.104534	-10.7305	20.6271	-20.0384	13.5842	-59.117	0.464981	0.296567	0.633569	1
-2.35602	0.024722	11.3319	30.1752	-0.066945	-65.70849	-32.5976	-0.567093	-0.17972	13.3001	5.95391	1.18501	4.03439	-42.8002	0.785727	0.492331	0.863516	1
559.371	0.108642	27.0458	25.872	-0.428013	-44.15688	-56.1993	-0.344925	-0.008302	-4.32799	21.4321	-25.713	13.2458	-54.852	0.201015	0.131285	0.500605	1
240.711	0.073437	28.3711	9.5766	0.180035	-33.11395	-10.6504	-0.046143	-0.054983	-0.277298	14.9298	-6.6693	5.34078	-72.1898	0.031052	0.010751	0.322387	0
223.943	0.039808	16.1235	-8.11377	-0.239283	-58.04918	-16.957	-0.386792	-0.011874	18.8984	17.727	-4.7855	4.34605	-65.1687	0.020312	0.057875	0.213493	0
502.475	0.080399	36.9863	11.7088	-0.192158	-52.77029	-17.9872	-0.120904	0.000448	4.66485	18.3355	0.051414	7.33954	-77.9959	0.020886	0.012992	0.292103	0
157.895	0.072679	22.9843	3.40439	-0.383529	-41.38980	-13.164	-0.194364	0.10361	1.64154	14.7273	-3.51808	-7.08008	-54.5199	0.096467	0.363987	0.29799	0
94.8196	0.031127	22.475	-1.8481	-0.246995	-56.12188	-15.5189	-0.461235	0.021979	16.9203	20.8879	-3.53881	7.70865	-45.8844	0.01274	0.011666	0.265689	0
158.714	0.040318	-2.36517	8.80699	-3.02956	-60.36596	-9.97327	-1.03418	0.138532	17.315	17.8212	-9.36242	6.80516	-48.2313	0.068559	0.025652	0.4244	0
0.378724	0.038701	8.0663	15.7594	-2.93945	-66.40473	-8.53041	-1.92008	-0.439339	18.9146	4.65491	13.921	6.80516	-44.0378	0.038724	0.119982	0.404687	0
304.452	0.045244	17.0527	12.3607	-1.17423	-80.20052	-13.7939	-0.747203	0.036248	17.535	17.8212	56.937	6.80516	-56.4019	0.06915	0.034596	0.106923	0
401.577	0.083262	15.8925	10.8027	-0.261011	-70.99824	-14.6998	-0.1163	-0.056511	-7.98714	43.7591	-35.5603	6.80516	-64.3215	0.149567	0.042216	0.218905	0
189.483	0.04403	0.425653	7.74986	-3.02956	-65.08757	-10.9246	-1.03418	-0.0759926	15.0741	17.8212	-22.5906	6.80516	-47.0336	0.063761	0.029274	0.103596	0
-182.861	0.071064	2.46017	9.85984	-2.3124	-55.30933	8.82363	-1.22103	-0.12649	16.1538	-0.551839	17.6692	-1.57322	-51.0033	-0.000001	0.04557	0.096114	0
431.233	0.069388	4.85051	10.112	-1.31313	-55.08065	5.69289	-0.860078	-0.183782	17.7542	9.3773	22.0121	-5.5844	-54.6447	0.000012	0.282897	0.850081	0
44.316	0.071559	17.5034	11.09	-3.4386	-72.10546	4.4765	-1.35956	0.243164	15.5592	10.4597	21.9648	3.71253	-71.5985	0.000003	0.30947	0.042587	0
628.421	0.094815	5.69216	9.13277	-3.83204	-32.18096	14.6832	-1.24625	-0.041935	8.01341	8.71051	5.66665	2.24205	-56.461	0.000025	0.313406	0.678716	0
671.241	0.089653	23.0981	8.26099	-4.53531	-76.47590	1.62279	-0.402746	-0.0759926	8.82077	13.5288	8.13443	10.985	-83.7557	-0.000007	0.015983	0.178362	0
635.109	0.0603505	49.0426	1.17853	-0.726955	-63.27816	-16.6613	-0.288799	0.000478	-8.1276	20.8858	-5.35128	0.677733	-77.6811	0.684728	0.569	0.696581	0
114.516	0.049087	13.0739	5.11326	-8.38726	-38.80214	-14.9536	-3.88938	0.225852	13.2603	-4.08449	-9.28557	2.32432	-47.498	0.870398	0.084083	0.091194	0
-4.20432	0.111023	46.4956	-2.01975	-0.358694	-68.53340	-15.8242	-0.227562	-0.049411	-5.98329	21.4243	-4.74459	9.88312	-82.1532	0.467404	0.529058	0.551948	0
-1.10404	0.036851	18.3631	5.83032	-7.23113	-57.51202	-13.9737	-3.30957	-0.0759926	22.9314	5.59388	-7.88474	6.80516	-49.4975	0.950449	0.255163	0.176568	0
179.729	0.022506	8.14153	0.964659	-5.32984	-54.56013	-14.2454	-2.51941	-0.0759926	23.7509	24.1275	-27.4308	6.80516	-43.78403	0.236171	0.243142	0.074105	0
-28.8537	0.074429	-1.52958	10.0666	-2.58454	-58.59023	-23.8232	-1.21432	0.252023	0.529413	8.80725	3.40495	28.5805	-54.9806	0.444156	0.307986	0.449558	0
30.4001	0.059865	16.0375	11.7403	0.4411	-71.52591	-21.3887	-0.067651	0.032132	11.3825	8.57807	17.9577	29.4592	-47.5964	0.950449	0.262369	0.160893	0
202.398	0.051912	21.8936	12.029	-0.409087	-81.48840	-20.0595	-0.200442	0.06009	12.0098	20.7094	17.0995	28.9122	-62.5286	0.950449	0.118838	0.109932	0
20.1035	0.056957	20.2081	4.7101	-5.04725	-78.70574	-23.4686	-0.429127	-0.0759926	-3.80167	21.9692	12.257	26.136	-80.2934	0.092561	0.118269	0.09003	0
326.977	0.057526	18.4533	0.898707	-7.60577	-70.93531	-23.3173	-2.42287	-0.0759926	-4.39398	21.1672	12.4448	27.2733	-76.1926	0.276834	0.078088	0.154408	0
534.641	0.05694	15.6331	9.22615	-2.49654	-81.39857	-5.68131	-0.889637	0.127219	21.1063	22.7456	18.438	6.80516	-59.3455	0.950449	0.348969	0.079419	0
-56.0749	0.0603505	7.31996	11.8178	1.05147	-50.89165	2.16045	0.113308	-0.017288	-4.3311	17.2517	18.5638	6.80516	-59.0204	0.450722	0.08247	0.075439	0
154.668	0.060192	13.7801	7.06786	-0.23536	-77.42501	-7.58491	-0.154138	-0.031177	19.1051	20.213	24.7066	6.80516	-60.5937	0.950449	0.040013	0.070739	0
57.908	0.062375	3.63187	1.72116	-9.00726	-58.46225	-6.9181	-1.03418	-0.0759926	2.55041	12.2886	18.373	6.80516	-63.5934	0.245453	0.023925	0.029919	0
175.509	0.064888	22.0222	2.89174	0.151738	-80.46167	-5.75273	-0.062079	-0.013679	10.6044	25.8071	24.318	6.80516	-87.6199	0.091688	0.01705	0.020353	0
258.09	0.059534	13.6538	10.18	-0.251204	-75.22197	-8.04376	-0.163186	-0.069798	15.0806	16.8777	23.0339	6.80516	-58.4913	0.950449	0.03245	0.03647	0
157.517	0.039183	34.2972	11.1177	-4.61015	-76.60636	-30.4627	-2.78117	0.147198	17.3615	9.2208	-9.36099	-10.373	-73.7321	0.950449	0.493071	0.827371	0
-1.72393	0.041675	-4.22621	9.31026	-3.44093	-52.42733	-31.8518	-2.05491	0.431934	6.34352	0.305288	-11.0021	-0.211819	-45.6785	0.950449	0.339686	0.177428	0
243.928	0.040185	10.4799	9.39396	-5.02444	-65.20824	-27.18	-2.37555	-0.0759926	15.0362	-13.4113	-17.4356	-12.2134	-48.5258	0.950449	0.348969	0.503573	0
37.929	0.064522	13.0141	12.3443	-6.8811	-82.10019	-38.1666	-1.90635	-0.0759926	7.49177	3.37584	-21.4231	-0.939149	-75.1625	0.950449	0.53521	1.26558	0
107.749	0.078259	20.4411	7.78188	-6.87319	-67.98224	-31.3181	-3.06509	-0.0759926	-0.561437	11.1484	-21.3249	1.77681	-65.5897	0.950449	0.348969	0.232358	0
242.431	0.0603505	-3.81637	5.0368	-4.51207	-49.96817	-30.6735	-2.622	0.317797	-12.6135	17.8212	-2.55595	-3.72419	-66.6991	0.950449	0.348969	0.09897	0
50.192	0.043213	13.3422	15.3627	-0.236001	-67.30685	0.291166	-0.232592	-0.096206	12.9334	15.6941	-3.34975	-11.7815	-57.1962	0.15364	0.53731	0.503573	0
-78.9209	0.056999	26.5211	8.17646	-0.128044	-58.53703	-4.20801	-0.114454	0.020492	1.00683	11.4879	5.56255	23.1865	-75.5799	0.166575	0.307087	0.503573	0
33.9875	0.044637	5.93058	8.09966	-2.93653	-55.20889	-0.159947	-1.15042	0.18329	13.1946	6.77872	-2.0366	0.199944	-54.1534	0.097266	0.336529	0.503573	0
208.596	0.040893	20.4248	13.8666	-0.529766	-63.38771	3.79224	-0.400457	0.013055	17.3688	20.8439	-2.59677	-7.47468	-58.7746	0.101788	0.511897	0.503573	0
484	0.054581	1.85584	14.4877	-11.9428	-63.26782	-7.8705	-3.6214	-0.0759926	-0.270783	13.379	2.38941	18.9685	-77.2454	0.057516	0.190782	0.503573	0
-63.3297	0.050542	37.3247	11.7396	-1.60118	-65.28945	-13.8366	-0.501991	-0.241746	-3.81216	17.9966	8.36163	-8.83594	-62.9431	0.326807	0.030322	0.044053	0
183.912	0.035342	20.1379	14.4652	-1.9158	-59.08111	-16.9789	-1.10415	0.045364	1.08588	15.9009	5.96395	-4.82167	-65.8495	0.27853	0.052943	0.249197	0
17.9774	0.044669	44.9877	7.97597	0.680087	-64.82605	-11.8802	0.151067	-0.002806	-3.14857	16.1118	5.82171	-11.8691	-60.5072	0.367878	0.033578	0.045903	0
331.671	0.0603505	55.9646	1.7044	-0.274768	-62.21067	-17.3543	-0.119543	-0.006892	-17.7415	17.321	2.41817	0.876572	-80.624	0.307441	0.025754	0.06128	0
385.076	0.070902	39.8522	1.41405	-6.706906	-42.20672	-15.1476	-1.76207	0.240479	-6.03973	8.33876	4.90543	-4.26718	-66.3736	0.304933	0.077441	0.041084	0
