# Supplementary material for: Prediction of ACL injury incidence and analysis of key features in basketball players based on multi-algorithm models
Source: PeerJ. 2025 Oct 14;13:e20141. doi: 10.7717/peerj.20141 (PMC12533536; doi:10.7717/peerj.20141)
Supplement: Supplemental Information 6 [file peerj-13-20141-s006.xlsx]

## Sheet: LIFE direction
FP3(x)	COP DISTANCE(X)	left ankle moment(X)	left hip angle(Y)	left hip moment(X)	left hip moment(Y)	left knee moment(X)	left knee moment(Z)	R_SHARL_ANGLE(Y)	right ankle angle(Y)	right ankle moment(Y)	right hip moment(Z)	Injury Label 1=YES，0=NO
-259.564	0.031285	0.012934	23.5774	-0.213712	-0.144742	-0.090931	-0.022624	16.3677	-25.2709	-0.0507	-0.101221	1
-254.466	0.046304	-1.48197	25.0843	-4.70567	0.655654	-1.63822	-0.212145	16.2347	-12.7283	-0.174192	-0.030603	1
-344.314	0.046965	-0.413133	24.0752	-1.97058	0.179931	-0.785145	0.234142	12.3862	-37.2779	-0.141857	0.061783	1
-18.2832	0.008692	0.047365	17.7597	-0.199407	-0.00546	-0.390379	-0.092016	6.20096	-39.2244	0.075191	-0.708226	0
-235.49	0.031165	-0.352308	20.9855	-0.867156	-0.195727	-0.502988	-0.241396	2.67418	-31.7195	0.009452	-0.127225	0
-542.235	0.050584	0.020621	22.9652	-0.149481	-0.312423	-0.251412	-0.138434	8.0956	-30.0504	-0.312931	-0.67615	0
-226.338	0.032008	-0.413133	28.7413	-5.59795	0.261311	-2.70466	-0.212145	12.7954	-54.444	-0.176382	-0.636445	0
-40.3964	0.024152	-0.413133	28.2212	-5.52933	0.57498	-2.71032	-0.212145	5.04622	-53.1321	-0.078115	-0.39013	0
-246.97	0.033687	-1.37814	26.8298	-3.33846	0.086453	-1.62867	-0.705923	5.10168	-47.6086	-0.157329	-0.20653	0
-244.246	0.0566732	0.010032	9.72751	0.092563	-0.237315	-0.091163	-0.022464	5.72698	-17.3173	-0.128675	-0.353842	0
-414.733	0.054998	0.069923	26.2173	0.197945	-0.441421	-0.118949	-0.054005	7.54981	10.9756	-0.529268	0.042608	1
-471.716	0.049508	-0.146267	25.6006	-0.796721	-0.117811	-0.121091	-0.223289	24.9084	0.117201	-0.13791	-0.545713	1
-308.415	0.054455	-0.413133	18.336	-3.22498	0.291079	-1.95945	-0.212145	17.0839	15.7352	-0.291804	-0.06105	1
-258.419	0.07437	0.837098	17.7931	-6.36048	0.179931	0.744377	0.012938	2.33792	-0.526285	-0.601912	-0.752138	0
-224.205	0.063326	0.01262	16.3873	-0.140352	0.097045	-0.164555	0.06284	7.58192	12.1515	-0.268167	-0.41813	0
-284.211	0.077106	0.010971	16.6726	-0.313882	0.076251	-0.224318	0.051454	7.27495	-2.20718	-0.481593	-0.289281	0
-190.958	0.040727	-0.905369	24.6745	-5.13155	0.179931	-0.785145	-0.212145	9.91225	-19.1103	-0.384433	-0.37247	0
-485.46	0.075009	0.00565	26.1109	0.135494	-0.098719	-0.127564	0.023099	6.08959	-7.96797	-1.06538	0.295086	0
-261.794	0.045284	0.602145	22.9134	-5.71292	0.179931	-2.65395	0.355174	10.3011	-7.37451	-0.498921	-0.262454	0
-370.477	0.043612	0.023668	13.2572	0.086078	-0.299507	-0.057671	-0.015227	16.7234	10.2317	-0.295779	-0.748803	0
-244.089	0.049637	-0.634883	20.746	-1.75028	0.013407	-0.629815	-0.368194	12.6965	14.6299	-0.430549	-0.92696	0
-337.892	0.046087	-0.801727	15.4776	-2.02304	0.027409	-0.587554	-0.277528	16.0166	10.4035	-0.279866	-0.796301	0
-631.239	0.053516	-1.85287	29.8805	-7.66442	0.179931	-0.785145	-0.212145	16.0625	2.62726	-0.354385	-0.491743	1
-160.578	0.050583	-1.68629	36.2442	-7.13666	0.179931	-0.785145	-0.212145	11.6328	0.0935	-0.245495	-0.552512	1
-181.615	0.049965	-1.49608	34.6132	-5.9835	0.179931	-0.785145	-0.212145	5.40471	-2.83344	-0.384204	-0.311569	1
-200.608	0.055572	-1.88783	13.8401	-5.55544	0.605155	-0.747113	-0.636695	15.2713	-21.5273	-0.604235	-0.717845	0
-514.756	0.041187	0.019065	15.9085	-0.117099	0.073022	-0.012432	0.074164	15.828	-53.9716	-0.591619	-0.761872	0
-85.2829	0.05021	-1.38773	11.1164	-7.44675	0.179931	-1.23748	-0.710633	9.9414	-48.7522	-0.628558	-0.29723	0
-257.082	0.059908	-0.030801	22.8025	-0.154387	-0.068954	-0.081937	-0.013074	23.5438	36.4687	-0.438958	-0.297546	0
-355.766	0.0604	-0.589374	19.6582	-5.43194	1.24952	-1.17824	-0.696879	18.1926	45.0811	-0.644331	-0.881768	0
-261.578	0.050191	-0.033206	21.3706	0.205659	-0.024502	-0.131104	0.086969	15.7633	46.533	-0.703701	-0.845613	0
-373.368	0.051767	-0.747738	27.0092	-2.13661	-0.684506	-0.003171	-0.212145	-2.54179	9.91052	0.037776	-0.203948	0
-423.398	0.045938	0.033462	22.4897	0.529766	-0.287851	0.049982	0.145032	-3.17337	9.91422	0.081894	0.030513	0
-244.375	0.051866	0.067115	33.0886	0.769238	-0.638416	-0.178637	0.014541	2.2292	5.16833	0.42805	-0.402388	0
-422.048	0.041114	-1.72231	14.4378	-4.28214	0.541657	-1.87801	-0.49627	-8.0029	12.7386	0.283267	-0.431177	0
-468.249	0.033675	-1.07496	10.2002	-2.35546	0.245709	-0.841942	-0.258331	-5.31998	18.6541	0.294018	-0.537957	0
-283.318	0.045625	0.033943	16.0657	-0.078428	-0.002553	-0.168139	0.051517	10.8816	15.7052	0.242782	-0.455452	0
-207.834	0.062256	0.021345	16.729	0.149574	-0.252693	-0.055847	-0.010831	8.77457	3.26828	-0.571288	-0.263376	0
-92.5817	0.050114	-0.956176	17.7678	-3.84448	1.06852	-2.2496	-0.388488	9.74104	3.78058	-0.274044	-0.272481	0
-341.258	0.06983	0.017687	28.1692	0.023615	-0.052882	-0.106514	-0.023273	11.9406	13.9533	-0.427987	-0.471345	0
-254.159	0.066174	0.013148	15.8949	0.013713	-0.146549	-0.05811	-0.013238	11.2883	5.5397	-0.378704	-0.467327	0
-109.471	0.060577	-0.863103	14.0558	-4.30956	0.179931	-2.03539	0.182809	10.212	-2.052	-0.401811	-0.352208	0
-225.199	0.043994	0.537873	29.4679	-3.82309	1.28512	-1.43295	-0.649993	2.11729	-63.3131	-0.239158	-0.460014	1
59.5303	0.029763	0.560207	33.478	-6.78313	0.179931	-2.6419	-0.212145	-2.77231	-62.2048	-0.096428	-0.671797	1
-213.793	0.032061	0.188797	26.5231	-4.50717	0.87248	-1.60747	-0.212145	4.97202	-0.819341	-0.129385	-0.673392	1
-34.8361	0.063419	-0.413133	23.5465	-6.40411	0.179931	-0.785145	-0.190242	4.52697	12.8876	-0.863757	-0.855694	0
-407.287	0.101791	0.010995	22.7554	0.196024	-0.219109	-0.098778	-0.025236	20.8056	-2.71137	-0.878405	-0.540177	0
-199.283	0.074584	-0.726039	17.8835	-1.91267	0.244258	-1.06928	-0.205907	11.4444	8.43875	-0.539128	-0.720394	0
-665.85	0.071505	-0.001111	28.1351	-0.395853	-0.098911	-0.239579	-0.118694	14.7907	-12.177	-0.629624	-0.806711	0
-448.284	0.059293	0.020466	24.527	-0.500514	-0.063458	-0.252409	-0.047982	18.068	-9.33494	-0.245297	-0.881838	0
-260.081	0.054105	-0.934977	23.7062	-2.19387	-0.703815	-1.0026	-0.509366	10.5063	-10.0149	-0.249456	-0.465344	0
-420.48	0.076105	-0.005322	28.1393	0.154062	-0.539148	-0.111709	-0.069826	14.7954	27.3576	-1.07442	-0.821382	1
-374.582	0.08345	0.045366	22.4195	-0.13742	-0.436386	-0.073282	-0.025074	9.12739	10.5273	-0.928752	-0.474905	1
-379.797	0.078626	0.010061	23.6409	-0.104615	-0.040457	-0.108165	0.017715	17.3169	40.4246	-1.15753	-0.700307	1
-29.1856	0.029019	0.355373	19.7397	-5.55603	0.179931	-2.36107	-0.212145	6.03923	-44.9877	0.003988	0.107552	0
-298.941	0.075764	0.191803	29.0317	-2.54711	0.404167	-0.473754	-0.2845	11.9965	-5.59776	-0.003318	-0.121756	0
-509.545	0.06614	-0.005675	29.4245	-0.660387	-0.281593	-0.170387	-0.15021	11.6162	-1.20578	-0.002952	-0.157159	0
-313.545	0.071832	0.112032	23.3415	-4.86301	0.610695	-1.33124	-0.622702	11.177	0.009713	-0.577453	-0.668631	0
-514.984	0.083451	0.014954	23.4953	0.324093	-0.358126	-0.07303	-0.022594	16.0568	58.0646	-0.787669	-0.245294	0
-321.321	0.056942	-1.54086	27.3386	-3.10763	-0.224875	-1.26982	-0.212145	15.2363	52.2083	-0.383737	-0.570128	0
-199.182	0.055492	-0.413133	36.6484	-3.79086	-0.339438	-1.97121	-0.212145	10.4247	49.034	-0.466058	-0.399742	0
-403.147	0.029363	0.008954	24.4729	0.018158	-0.187521	-0.184488	-0.075542	23.8253	-30.8473	0.024921	-0.671395	0
-351.094	0.047094	0.010326	23.6241	0.213856	-0.089396	-0.096954	0.024166	19.3824	-27.9512	-0.286176	-0.525499	0
-217.916	0.080411	-0.303231	23.7637	-2.28795	0.363284	-0.796001	-0.289304	6.24768	-12.3279	-0.735019	-0.432838	0
-473.502	0.051503	0.016273	34.7742	0.116822	-0.242413	-0.012687	-0.013183	8.31512	5.94524	-0.451974	-0.649342	0
-433.035	0.04841	-0.047264	28.1516	-3.113	-0.468057	-0.917828	-0.212145	8.38994	-1.74606	-0.383652	-0.733069	0
-309.834	0.047229	-0.016033	32.6746	0.065134	-0.22909	-0.101529	-0.029314	5.87087	5.09805	-0.465962	-0.694434	0
-759.029	0.04678	0.002728	14.5959	0.374068	0.045386	0.152609	0.200439	21.5259	-14.6838	-0.371038	-0.694609	0
-352.347	0.042427	-0.006486	6.17159	0.189357	0.193932	0.041928	0.279954	23.762	-20.487	-0.099026	-1.1985	0
-577.555	0.058094	0.967438	13.475	-5.48789	0.179931	-1.49365	0.201279	11.0895	6.56152	-0.659737	-0.401588	0
-456.169	0.041691	0.019895	12.6799	-0.065248	-0.4302	-0.110273	-0.103354	17.9626	-9.78183	-0.266342	-0.474905	0
-421.972	0.040164	0.021457	14.0387	-0.169972	-0.629353	-0.113638	-0.195997	19.9229	-10.9903	-0.176651	-0.474905	0
-449.58	0.032329	0.012412	13.326	-0.419224	-0.664742	-0.105926	-0.218602	15.0838	-10.1891	-0.214972	-1.25297	0
-234.39	0.054479	0.019191	17.5645	0.349726	-0.102518	0.11911	0.090734	19.1582	-22.6878	-0.297984	-0.696014	0
-421.874	0.070942	0.051891	22.1749	-0.728129	-0.071335	-0.178721	-0.090592	10.8816	-0.819341	-0.26448	-1.17079	0
-457.389	0.052039	0.001863	19.1059	-0.172858	-0.070227	-0.070252	-0.024527	22.2506	-57.9192	-0.483222	-0.350465	0
-390.998	0.057003	0.007718	38.5739	-0.083153	-0.192061	-0.018794	-0.015592	6.05258	45.9926	-0.854628	-0.284686	0
-660.249	0.056531	0.020415	16.1774	-0.112994	-0.164902	-0.141332	-0.030069	9.8756	40.5131	-0.681265	-0.225153	0
-694.085	0.048947	0.020255	16.1774	-0.126332	-0.20694	-0.057601	-0.002179	12.9212	40.7412	-0.365779	-0.295463	0
-158.153	0.0566732	0.013734	25.837	0.027256	-0.095051	-0.054215	-0.033723	-6.44048	42.2841	0.007199	0.073043	0
-158.962	0.07982	0.038268	31.536	-0.215173	-0.083754	-0.17292	-0.053041	4.97666	55.0827	-0.595628	-0.349891	0
-298.326	0.07462	0.019646	27.217	0.300892	-0.290867	-0.125894	0.021751	8.65089	46.7424	-0.583568	-0.405051	0
-252.148	0.087344	0.019228	21.5821	0.174534	-0.294214	-0.054531	0.0002	8.93667	12.2545	-0.994599	-0.696008	0
-211.922	0.075749	0.016954	25.4469	-0.468018	-0.260567	-0.557095	-0.206817	1.20042	11.9666	-0.788205	-0.314903	0
-336.668	0.079038	-0.064268	26.6124	-0.672714	-0.194838	-0.685686	-0.241536	5.46433	13.6229	-0.778623	-0.51806	0
-54.3691	0.039329	-0.413133	27.6892	-8.64822	0.962591	-0.785145	-0.212145	6.07369	-25.5094	-0.510461	-0.623105	1
-39.517	0.040617	-0.413133	26.5557	-8.25412	0.447706	-0.785145	-0.212145	13.1432	-5.77993	-0.2928	-0.314125	1
-271.429	0.053214	-0.374942	24.781	-0.774662	-0.51951	0.125537	-0.507659	16.7394	-6.30841	-0.325706	-0.216183	1
-292.702	0.052358	-0.970572	14.4697	-1.97058	1.16138	-0.785145	-0.212145	12.0893	-9.20364	-0.423158	-0.151646	0
-491.247	0.055378	-0.008837	19.7712	0.006992	-0.060049	-0.074331	-0.000986	14.8219	-10.2155	-0.392864	-0.166599	0
-808.464	0.046427	-0.668143	9.17602	-7.05822	-0.202239	-0.756686	-0.212145	23.7183	-0.056307	-0.162973	-0.158373	0
-477.112	0.065939	-0.413133	25.3708	-7.47107	0.179931	0.041729	-0.212145	13.9737	14.0644	-0.399829	-0.318819	0
-307.946	0.060596	0.543006	25.6083	-7.3068	0.179931	-0.199153	-0.212145	7.00235	-25.933	-0.506848	-0.290763	0
-508.109	0.088322	-0.010254	27.9569	-0.075004	-0.093734	-0.011385	0.025793	11.7875	36.6413	-1.19798	-1.00417	0
-574.173	0.057881	0.017641	18.3499	-0.600502	-0.138669	-0.121686	-0.080305	13.8959	11.3226	-0.882523	-1.27498	0
-616.548	0.052607	0.021879	24.6587	0.000232	-0.13279	-0.162607	0.037151	14.5948	7.65101	-0.680144	-1.2081	0
-439.012	0.050193	-0.300686	19.5396	-2.30076	0.178652	-0.503114	-0.364243	12.3421	-11.5196	-0.559606	-0.756237	0
-9.60183	0.026201	-1.7624	24.7256	-6.82848	0.179931	-0.785145	-0.212145	0.857857	-45.4323	-0.67964	-0.489218	0
-373.703	0.04231	0.046655	21.4932	-0.122737	-0.020814	-0.081677	0.054377	7.00041	-34.7742	-0.800454	-0.410606	0
-353.361	0.033818	0.046855	24.356	0.025748	-0.099639	-0.114074	0.030215	6.82869	-43.108	-0.719977	-0.451122	0
-149.349	0.06167	0.011285	31.1602	-0.114381	-0.17841	-0.039727	-0.018505	-5.62338	40.1606	-0.617632	0.254153	0
-214.784	0.065286	-0.258425	26.9705	-1.88819	0.155694	-1.05933	-0.29276	4.71631	26.3759	-0.034383	0.084696	0
-701.792	0.080174	-0.332928	26.6536	-2.64642	0.739117	-0.37672	-0.185284	16.1989	44.4296	-1.04423	-0.335466	0
-607.276	0.076778	0.015019	24.4702	-0.008226	-0.259909	-0.160793	-0.055142	18.0318	42.7061	-0.811231	-0.116635	0
-714.872	0.069793	0.027349	28.4156	0.032751	-0.11287	-0.145143	0.013757	17.0399	44.7188	-0.844986	-0.726685	0
-146.439	0.022075	-0.413133	14.042	-1.97058	0.179931	-0.785145	-0.212145	4.83235	-40.6718	0.124966	-1.02679	1
-333.183	0.069851	0.001682	14.9754	0.274924	-0.314557	-0.109546	-0.038368	12.124	-22.3929	-0.570765	0.192444	1
-256.983	0.021706	0.011638	11.803	0.427683	-0.067247	-0.27263	0.030591	9.50729	-42.1416	0.121023	-0.445027	1
-122.851	0.053091	0.014705	26.9325	0.115649	-0.218549	-0.113791	-0.028344	7.87441	-7.69897	-0.188255	-0.576871	0
-622.489	0.057687	0.074003	22.9608	0.519591	-0.499396	0.994892	0.019687	4.01338	-8.21568	-0.806568	-0.525233	0
-153.03	0.05294	-1.66711	26.458	-3.92743	1.14775	-1.59373	0.075724	2.69238	-6.97938	-0.274016	-0.348061	0
69.6739	0.057543	0.017048	27.2585	0.286554	-0.119629	-0.073262	0.024155	1.6858	-12.372	-0.348556	-0.142884	0
-247.942	0.05053	-0.021521	22.2813	-0.09624	0.143007	-0.080957	0.076166	9.88539	26.7491	-0.339906	-0.170856	0
-404.3	0.054052	0.03685	23.1741	0.1218	-0.078593	-0.083841	0.071202	12.283	17.4087	-0.386418	-0.493075	0
-326.019	0.05378	-0.026781	25.4765	0.49318	-0.257948	-0.128387	0.02541	10.289	27.9907	-0.327531	-0.337655	0
-462.179	0.027633	0.008293	7.71774	-0.055108	-0.14024	-0.223969	-0.054519	23.8708	-33.2601	0.199256	-0.691788	0
-390.002	0.047425	-0.24149	7.55199	-1.07504	0.184713	-0.39108	0.165298	18.2073	-27.5699	-0.187877	-0.497876	0
-547.225	0.082114	-0.30055	6.14476	-1.9981	0.380162	-0.773423	0.310631	4.53549	-18.0659	-0.632741	-0.482404	0
-832.775	0.072025	0.068885	13.9821	0.296132	-0.570097	-0.166276	-0.058046	16.5685	14.3941	-0.601053	-0.557443	0
-557.732	0.085033	0.054363	12.5778	-0.365344	-0.178478	-0.114569	-0.007437	12.0694	17.0149	-0.84838	-0.474905	0
-676.143	0.068734	0.015883	11.9764	-0.182496	0.028788	-0.081261	0.044273	17.5864	22.1642	-0.711044	-0.508333	0
-742.435	0.051398	0.048046	8.05746	0.184323	0.313483	0.159344	0.09726	18.236	7.28721	-0.285094	-0.365165	0
-556.762	0.051503	0.045235	6.6194	1.16062	-0.421065	0.153942	-0.000324	20.8942	7.74355	-0.447237	-0.106006	0
-949.55	0.043102	-0.459922	-0.574388	-0.772684	-0.264746	-0.583887	0.125379	18.6698	9.13625	-0.178971	-0.403626	0
-999.033	0.060565	-0.019132	10.6367	-0.064535	-0.125742	-0.035414	-0.014202	26.0779	19.1237	-0.281052	-0.199818	0
-493.015	0.065872	-1.49951	5.67554	-3.47584	1.02023	-1.55814	0.33583	19.2258	23.2553	-0.458492	-0.535603	0
-509.271	0.053765	-0.624823	4.91321	-1.90331	0.078001	-0.830607	0.014485	16.7662	18.3351	-0.587055	-0.667672	0
-598.912	0.054509	0.07518	9.58456	-0.47417	-0.147312	-0.170261	-0.029911	16.3413	-16.2795	-0.346206	-0.065722	0
-266.007	0.038315	-1.66387	6.40904	-7.3828	0.642763	-0.785145	0.351879	17.5017	-13.2664	0.078315	0.01615	0
-713.233	0.030101	-0.728596	3.19616	-7.10896	-0.122403	-2.48078	-0.40081	22.2276	-21.6584	-0.033991	-0.271068	0
213.227	0.0566732	0.015625	1.91897	0.147164	-0.18479	-0.15742	-0.079401	-8.90921	-4.02285	-0.410768	0.017173	0
-413.014	0.10034	0.014477	-0.402212	0.115765	-0.277518	-0.082938	-0.109323	10.8816	-9.70518	-0.410768	-0.008077	0
-259.239	0.070444	0.009663	12.8385	0.163287	-0.096311	-0.127235	0.009702	9.66613	-23.8331	-0.932901	0.248264	0
-349.716	0.044888	-0.413133	7.49834	-1.97058	0.179931	-0.785145	-0.212145	1.98595	-14.4489	-0.93169	-0.668751	0
-537.819	0.060327	0.057749	4.05566	-0.287017	0.066425	-0.072825	0.042781	8.28838	-11.733	-1.16239	-0.630114	0
132.326	0.054908	0.05799	7.06512	0.064989	0.034606	-0.085856	0.040479	8.23225	-14.9663	-1.01923	-0.67777	0
58.4006	0.070827	0.02197	12.2383	0.408914	-0.386995	-0.09352	-0.048324	15.6148	-0.819341	-0.958251	-0.308412	0
-278.174	0.036341	0.079956	15.4614	0.997292	-0.623233	-0.003289	-0.051502	17.6701	23.8756	-0.121865	-0.678949	0
-413.939	0.042411	-0.413133	18.8515	-3.53824	-0.140722	-2.40848	-0.697405	14.8391	3.59073	-0.149721	-0.478513	0
-352.347	0.055626	-0.413133	13.6647	-8.4339	1.04523	-0.785145	-0.212145	5.25201	2.67556	-0.559939	-0.633037	1
-352.347	0.056134	-0.413133	12.2813	-6.49103	0.985459	-0.785145	-0.293547	9.77585	10.3242	-0.31126	-0.325823	1
-352.347	0.049046	-0.413133	12.6319	-8.1758	0.466361	-0.785145	-0.212145	13.8625	5.21379	-0.332879	-0.254653	1
-906.295	0.104206	-0.012208	8.38773	0.076874	-0.179459	-0.015269	0.000899	24.8746	-1.76688	-0.642529	-0.472875	0
-882.463	0.096354	-0.077046	10.642	-0.038674	-0.254776	-0.099337	-0.034102	21.6813	-1.5788	-0.704265	-0.530838	0
-375.795	0.077598	-0.534592	2.744	-1.39248	0.239974	-0.916416	0.187129	13.1502	5.94491	-0.391031	-0.542318	0
100.041	0.034535	-0.413133	19.2322	-6.90599	0.053413	-0.785145	-0.212145	2.44001	-36.3508	-0.140545	-0.331195	0
-521.769	0.031719	0.009628	13.4536	-0.364851	-0.064336	-0.122361	-0.052654	4.15586	-20.6375	-0.810065	-0.287111	0
136.992	0.083145	0.015233	-1.31431	0.008535	-0.437706	0.045823	-0.142741	10.8816	-13.6608	-1.03869	0.02485	0
-312.485	0.083295	-0.301609	16.0807	-1.90301	0.652749	-0.198459	0.179008	18.4572	29.6371	-0.758588	-0.115373	0
0.981898	0.078311	0.039718	10.5539	0.068718	-0.388427	-0.338778	-0.082584	18.7058	25.4639	-0.53842	-0.075411	0
-580.554	0.082	-0.364812	14.8068	-1.77907	-0.145019	-0.665298	-0.09832	19.5132	31.3409	-0.593215	0.024051	0
14.5427	0.032913	-1.23364	4.81847	-2.93759	0.40068	-1.1914	0.22191	-5.21417	0.133458	0.173915	-0.289263	1
-729.064	0.024383	-0.768152	0.812792	-1.6368	0.250359	-0.855527	0.120106	-3.09537	6.61775	0.191605	-0.321439	1
-503.059	0.039274	0.035032	6.78337	-0.165027	0.040829	-0.07592	0.030083	-7.65972	4.31083	0.136378	-0.187209	1
48.1186	0.03721	0.021152	2.83435	0.037454	-0.382574	-0.115066	-0.086815	18.493	-16.5182	-0.155943	-1.26815	0
-353.129	0.034928	0.019363	3.64895	-0.142954	-0.575678	-0.111072	-0.167401	19.0185	-17.8475	-0.099575	-1.25613	0
-438.484	0.02381	0.003654	6.15194	-0.667204	-0.569776	-0.352254	-0.269559	19.4581	-16.7624	-0.026841	-0.474905	0
-609.966	0.029558	0.015155	0.837342	-1.34319	-0.293427	-0.448813	-0.145107	7.63728	-6.75615	-0.249971	-1.0438	0
-705.273	0.050581	0.025295	8.65896	-0.257528	-0.277748	-0.135292	-0.060855	11.6675	-3.97559	-0.603864	-0.929014	0
-444.964	0.038138	-0.488121	10.7011	-2.57523	0.115569	-0.907972	0.340777	16.2909	0.226334	-0.19964	-0.785092	0
-507.701	0.073782	0.020772	10.2363	-0.489584	-0.082034	-0.666722	-0.044619	2.22849	4.80611	-0.567389	-0.252696	0
-496.035	0.076035	-0.150533	10.9126	-0.881986	0.083315	-0.854162	0.039451	7.04555	8.82929	-0.592092	-0.41782	0
69.0669	0.074892	-0.975681	4.6873	-3.5255	0.986216	-1.413	-0.212145	-3.56593	8.50947	-0.339266	-0.072061	0
-352.347	0.064286	-0.007329	12.9055	-0.394095	-0.082469	-0.144192	-0.066336	2.64125	-17.1541	-0.75277	-0.806707	0
-352.347	0.072588	-0.127916	9.79869	-1.08468	-1.07716	-0.465671	-0.543184	-3.90361	-0.819341	-0.19485	-0.324901	0
-352.347	0.038432	0.006703	8.54864	-0.795487	-0.086505	-0.189573	-0.135347	-7.15003	-11.531	-0.481818	-0.577489	0
-983.296	0.048234	0.016793	10.3008	0.607122	-0.296442	-0.01196	0.01032	3.5955	51.807	0.415092	-0.676719	0
-352.347	0.0566732	-0.036325	20.6012	-0.490722	-0.870869	0.107457	0.076759	10.8816	11.9048	-0.410768	-0.343865	0
-352.347	0.0566732	-0.062492	20.043	-0.982349	0.179931	0.098162	0.143185	10.8816	14.4373	-0.410768	-0.63342	0
65.6196	0.0566732	0.020559	10.7882	0.150132	-0.049677	-0.043131	-0.002944	0.305459	47.8543	0.006757	0.049093	0
-176.027	0.069453	0.057107	17.7919	-0.114286	0.053192	-0.230426	0.0395	9.84894	-0.819341	-0.665728	-0.351679	0
-401.565	0.064561	0.045089	14.2142	0.45295	-0.192431	-0.10504	0.020139	13.3099	58.106	-0.698459	-0.507922	0
-477.135	0.046	0.000421	16.1774	-0.655224	0.02693	-0.282253	0.006036	21.7485	-9.30383	-0.199241	-0.474905	0
-676.668	0.050091	0.011462	-3.51878	0.553351	0.061125	0.214772	0.090989	20.7304	-4.38381	-0.34659	-0.792972	0
-352.347	0.039285	0.018388	-9.05583	-0.104968	-0.076864	0.103164	0.063466	19.6492	-10.7287	-0.03362	-1.10133	0
-522.716	0.063305	0.020656	14.1838	-0.125347	-0.124662	-0.053056	-0.017304	-4.59174	36.9956	-0.449023	0.042179	0
-213.861	0.065039	-0.70168	6.72143	-4.53199	1.13983	-2.13424	-0.212145	0.193916	22.2589	-0.430774	-0.154109	0
-883.519	0.070355	-0.349411	10.1794	-1.53471	0.206692	-0.96973	0.175441	6.36539	31.571	-0.026308	0.062639	0
-4.18755	0.053114	0.017439	9.46996	0.071206	-0.190764	-0.11482	-0.056504	10.3023	-6.36557	-0.176874	-0.653405	0
-435.008	0.057005	-1.50894	10.1965	-3.77522	-0.087209	-1.43296	0.164043	10.8089	-9.80774	-0.363045	-0.917968	0
-387.738	0.054321	-1.0775	12.2117	-3.28582	0.302999	-1.42992	0.255831	7.09554	-9.70458	-0.249101	-0.311544	0
-126.02	0.057416	0.057843	7.5959	-0.010113	0.104545	0.024279	0.023163	11.2567	15.2131	-0.425711	-0.236042	0
66.1017	0.061733	0.056446	10.3236	0.176881	-0.036538	-0.078014	0.025994	14.0764	11.1821	-0.578431	-0.522638	0
-614.699	0.061509	0.080817	10.5566	0.846159	0.073624	-0.158165	0.038301	11.5434	16.527	-0.452309	-0.406951	0
-352.347	0.035976	-0.413133	10.8581	-5.6669	1.26724	-2.61634	-0.212145	20.1487	-20.2746	-0.067239	-0.123357	0
-352.347	0.02971	0.012344	11.2172	-0.199337	-0.09971	-0.077358	-0.006467	17.0091	-16.3456	-0.106429	-0.090557	0
-352.347	0.044931	-1.28632	12.4743	-4.16986	0.585293	-1.8015	-0.05893	16.9967	-9.94268	-0.200587	-0.02476	0
-352.347	0.053444	-0.648653	2.8459	-2.2583	0.100757	-0.934868	-0.0589435	5.37374	-3.72568	-0.370547	-0.218573	0
-999.142	0.061957	-0.010985	1.64945	-0.346744	-0.383778	-0.068239	-0.058957	9.42754	-9.84713	-0.540507	-0.412386	0
200.053	0.057546	0.015589	8.51526	0.101884	-0.192298	0.077859	-0.008295	27.5704	-8.37537	-0.284941	-0.701661	0
-642.66	0.043397	-1.75755	16.1774	-5.23086	0.931761	-1.53576	0.0187975	14.1507	-29.3219	-0.398811	-0.627897	0
-180.714	0.042888	-0.413133	6.48311	-1.97058	0.179931	-0.785145	0.04589	5.36031	-22.9545	-0.108541	-0.718557	0
-142.946	0.025521	0.055687	1.86914	0.41749	-0.514588	-0.234463	-0.108872	7.93279	-22.2059	0.050828	-0.40266	0
-265.641	0.075316	0.014416	7.01303	0.499785	-0.25001	-0.109805	-0.048311	17.3776	-19.3318	-0.42236	-0.005533	0
-309.959	0.031611	-1.20483	16.5865	-3.4926	0.273944	-1.23638	-0.172019	14.4299	-58.225	-0.035972	-0.390265	0
-93.4976	0.025509	-1.27702	16.912	-3.50161	0.408591	-1.04079	-0.226408	7.69674	-56.9418	0.079398	-0.263581	0
-526.885	0.026265	-0.933923	14.7205	-2.29647	0.366265	-0.812145	-0.137636	12.2899	-61.5354	0.074824	-0.1297	0
-635.001	0.05066	-0.247033	14.8439	-0.282706	-0.482065	-0.217222	-0.066918	-1.52749	5.36781	-0.032619	-0.278313	0
-669.736	0.054324	0.065203	17.2253	0.864818	-0.478406	-0.106885	-0.052882	1.49095	4.04807	0.390172	-0.260274	0
-514.448	0.03011	-0.016036	15.6948	-0.303289	-0.337483	-0.173699	-0.131061	10.8816	15.0742	-0.523494	-0.408153	0
-349.15	0.062179	-0.289852	6.45555	-3.16215	0.394043	-0.711612	0.382299	16.8105	0.144956	-0.50009	-0.591668	0
-472.616	0.063134	-1.75506	6.88228	-5.21647	1.01054	-2.3795	-0.212145	9.36983	7.30729	-0.492327	-0.275698	0
-931.398	0.063819	-0.005139	5.74432	-0.228246	0.18212	-0.131224	0.052899	20.1746	7.93978	-0.567208	-0.872366	0
-869.451	0.078433	0.01505	14.4135	0.121476	-0.034694	-0.052209	-0.038066	11.1341	19.1712	-0.293506	-0.447077	0
-614.491	0.074877	0.010922	4.34458	0.025391	-0.09375	-0.037988	-0.00218	8.1443	11.0421	-0.186195	-0.437009	0
-352.347	0.0566732	0.011425	11.8594	0.211453	-0.220808	-0.162657	0.009117	4.16751	-0.819341	-0.098365	-0.268759	0
-283.253	0.043702	-1.3689	25.2926	-4.11537	0.603167	-0.919576	-0.284947	19.4804	6.61983	-0.081558	-0.383846	0
-160.604	0.06246	-0.413133	21.49	-1.97058	0.179931	-0.785145	-0.172642	5.48231	3.9107	-0.550502	-0.669865	0
-234.549	0.057905	-1.68588	19.2234	-7.1423	0.179931	-0.785145	0.234205	7.1789	1.92533	-0.389528	-0.38238	0
-481.193	0.10548	0.013834	-3.69809	0.384099	-0.04031	0.078516	-0.08624	-4.79557	13.3861	-0.874089	-0.083113	0
66.4233	0.075959	-1.10516	2.33361	-3.6839	0.179931	-1.226	0.08883	-6.1478	4.10114	-0.342979	-0.368183	0
-893.765	0.072363	-0.413133	14.9055	-6.31383	1.20867	-2.34728	-0.250562	14.0484	24.4944	-0.355225	-0.011249	0
-882.449	0.066144	-0.349772	15.7362	-5.99103	0.179931	-2.10326	-0.212145	7.04831	14.9397	-0.527295	-0.201576	0
-631.574	0.093376	0.009287	20.3962	0.129449	-0.174663	0.018134	0.015076	14.4471	21.3755	-0.940963	-0.832287	0
0.554735	0.061367	0.030256	8.02626	0.445156	-0.12726	0.050976	0.028071	15.1695	-24.1337	-0.375818	0.048511	0
0.538615	0.048723	0.023244	11.4776	0.377837	-0.248598	-0.027172	-0.05984	15.0426	-19.5923	-0.333854	0.235464	0
-857.729	0.071026	-0.418906	7.9805	-1.17995	-0.353076	-0.490448	0.009656	14.9206	-7.90426	-0.001429	-0.000386	0
-812.143	0.097725	0.017562	7.61797	0.557998	-0.460513	-0.048169	-0.068933	14.4652	-2.25297	-0.000625	-0.155493	0
-352.347	0.066251	0.034142	17.3391	-0.149923	-0.43103	-0.1283	-0.058159	20.6586	-10.1292	-0.004281	-0.261284	0
-358.628	0.030849	0.017232	19.1651	0.010606	-0.337688	-0.166565	-0.06858	11.8258	-0.819341	0.057189	-0.566707	0
-424.829	0.041052	-0.689993	19.0117	-3.27345	0.996137	-1.76161	-0.167267	7.40675	-62.042	-0.125987	-0.586765	0
-92.5254	0.036479	0.008745	20.6045	-0.25337	-0.061052	-0.10935	-0.03458	1.09621	-55.5484	0.085052	-0.349744	0
-198.378	0.013308	-0.680135	7.31367	-2.14916	0.357075	-1.85498	-0.111683	14.161	-41.3853	0.181902	-0.779116	1
-623.113	0.055575	0.012622	5.10683	0.111731	-0.276436	-0.263067	-0.113279	3.87791	-21.9362	-0.332327	-0.400899	1
-827.132	0.050041	0.008003	2.153	-0.021559	-0.087983	-0.076722	0.01836	5.69142	-27.8102	-0.283566	-0.156042	1
-637.913	0.053135	0.032656	10.1146	0.274775	-0.24481	-0.075617	-0.032307	18.133	-3.97743	-0.207731	-0.626574	0
91.5634	0.062952	0.012469	12.3103	-0.015426	-0.130049	0.092963	-0.015959	17.1956	-12.7863	-0.368745	-0.194191	0
-801.012	0.071556	0.007709	11.514	-0.461931	-0.239752	-0.106267	-0.076244	21.2411	-6.30337	-0.364938	-0.545685	0
-508.767	0.054288	0.017482	21.3584	-0.232995	-0.232858	-0.05351	-0.05837	9.63435	14.194	-1.22654	-0.642852	0
-866.247	0.055796	-1.16042	29.6819	-3.04971	0.733513	-1.40962	-0.048897	13.3061	15.806	-1.08958	-0.51711	0
-910.71	0.053392	0.029376	27.9283	-0.449004	-0.144623	-0.141894	-0.034021	15.469	14.0862	-0.709036	-0.769588	0
-501.254	0.070441	0.032912	18.1796	-0.642258	-0.321402	-0.820398	-0.290114	15.92	37.0874	-0.591873	-0.449593	0
-457.838	0.072889	0.036276	20.7758	0.067188	-0.461476	-0.507726	-0.159985	16.0555	36.7233	-0.726056	-0.069455	0
-433.527	0.072885	-1.12414	23.0759	-6.69031	0.991412	-2.50928	-0.212145	13.8648	47.8265	-0.817304	-0.503066	0
-707.972	0.054324	-0.404358	17.2068	-4.559	0.466361	-0.477385	-0.353809	16.6084	-38.5886	-0.618683	-0.849208	0
-661.896	0.051747	-1.38712	11.188	-4.76256	0.399306	-0.697606	-0.673633	16.1886	-46.6587	-0.529002	-0.626324	0
-612.27	0.053881	-1.21911	11.6595	-4.64925	0.294527	-0.398088	-0.212145	13.6775	-39.1567	-0.632145	-0.543305	0
-376.357	0.050737	-0.887016	26.4304	-1.77764	-0.007221	-0.807708	-0.561024	11.842	3.1453	-0.475587	-0.596763	0
-445.917	0.042411	0.848157	23.3985	-3.05132	0.57571	-0.294717	-0.553386	16.8627	45.9791	-0.649095	-1.06872	0
-299.019	0.050389	0.835539	20.1894	-2.88976	-0.008015	-0.305754	-0.687694	16.5337	45.5624	-0.836206	-1.11781	0
-256.136	0.048417	-0.413133	26.2195	-5.14092	0.717649	-0.39922	-0.212145	12.6371	49.1079	-0.695302	-1.03723	0
-596.778	0.029712	0.021293	17.2003	-0.651558	-0.635	-0.283418	-0.363134	20.1558	-8.79317	-0.057531	-0.474905	0
-643.647	0.03987	-0.003181	19.6449	-0.448426	-0.447785	-0.28686	-0.287824	19.8779	-11.7464	-0.225488	-0.474905	0
-544.949	0.048233	0.013515	22.9846	0.120843	-0.193407	-0.07157	0.012372	13.6445	-5.84462	-0.503602	-1.251	0
-702.66	0.034181	0.032795	5.44628	0.228425	-0.407122	-0.170655	-0.047322	11.7251	-36.2449	-0.021988	-0.97345	0
-180.714	0.013006	0.052075	12.3485	0.336007	-0.620838	-0.26974	-0.107016	6.2272	-35.2465	0.2116	-0.536578	0
-252.946	0.017214	0.032496	5.91892	0.481125	-0.181265	-0.229409	0.020148	8.45253	-36.1718	0.164533	-0.746017	0
-409.987	0.029483	-0.413133	23.4343	-6.5278	0.179931	-2.56788	-0.212145	19.6112	-41.3049	0.008733	-0.179203	0
-116.661	0.079965	0.04993	16.7587	0.33562	-0.108228	0.201604	0.082186	11.092	24.4034	-0.323903	-0.637276	0
-108.363	0.083416	0.001223	17.1721	-0.345575	0.042485	-0.066654	-0.044743	7.97316	-11.8355	-0.345586	-0.508991	0
4.2328	0.051827	0.006625	21.5375	0.110331	-0.017748	-0.081541	0.064795	-1.07752	-28.7802	-0.351275	-0.587593	0
0	0.056733	0.064591	12.2758	0.080041	-0.351477	-0.16939	-0.053038	10.7744	5.26624	-0.525103	-0.015983	0
260.015	0.046274	-1.12925	8.51366	-1.68384	-0.0019385	-1.13888	-0.0547635	29.503	-8.19443	-0.096293	-0.633355	0
-709.687	0.054601	-0.413133	4.75148	-3.44771	0.3476	-2.10838	-0.056489	20.1356	8.62961	-0.289173	-0.055571	0
-331.193	0.076478	-0.452792	22.7455	-3.31684	0.361469	-0.634912	-0.212145	13.1285	36.9885	-1.10998	-0.852005	0
-236.789	0.063386	0.176918	24.1979	-2.0728	-0.240154	-0.362343	-0.698249	12.3639	15.98	-0.410768	-0.925999	0
-292.097	0.085162	-0.502356	25.0341	-3.28992	0.703258	-0.566673	-0.312109	17.6256	41.7415	-1.18467	-0.994477	0
-223.091	0.050442	-0.413133	27.013	-6.60776	0.953833	-2.41843	-0.212145	9.60825	2.88435	-0.315966	-0.396304	0
-371.162	0.047872	0.032912	22.3202	0.359771	-0.300149	-0.090281	0.027535	18.0036	-22.1449	-0.293444	-0.88162	0
-428.447	0.053851	0.01243	23.3241	0.018732	-0.147107	0.072981	0.000284	18.0593	-46.328	-0.368354	-0.198604	0
-466.069	0.057596	0.011025	23.1005	-0.455429	-0.27711	-0.122562	-0.139292	22.1565	-55.9408	-0.308812	-0.587076	0
-309.408	0.024004	-1.54503	27.1568	-3.73742	0.447825	-1.95365	-0.212145	11.01	-0.819341	-0.109948	-0.19657	0
-303.181	0.076136	-0.071283	22.1925	-0.461649	-0.119176	-0.132725	-0.180978	9.48037	-33.2998	-0.432771	0.04882	0
-485.9	0.028272	0.028882	20.1816	-0.352657	-0.585183	-0.194291	-0.242436	10.6083	-0.819341	0.013871	-0.592416	0
30.6964	0.028955	0.152422	31.9864	-5.96773	0.179931	-2.23179	-0.212145	-1.63736	-0.819341	0.006128	-0.350755	0
-264.884	0.0356	0.457431	25.8269	-3.4571	0.835019	-0.997498	-0.212145	2.73592	-0.819341	-0.04312	-0.408785	0
-178.088	0.073794	-0.413133	20.1879	-5.00408	-0.165382	-1.70054	-0.212145	7.11382	55.6115	-0.683043	-0.577872	0
-387.294	0.07552	-0.848736	28.8685	-1.75013	0.002246	-0.308468	-0.428587	7.65395	45.8172	-0.675915	-0.385464	0
-687.772	0.053252	0.03351	22.3296	-3.18637	0.501602	-0.22075	-0.692971	15.5812	31.4756	-0.235594	-0.356442	0
-398.069	0.044125	-0.413133	20.2428	-5.13605	0.955619	0.235877	-0.212145	17.693	31.8941	-0.150662	-0.338588	0
-568.956	0.050624	0.869712	18.9909	-1.80408	0.192148	0.213788	-0.647651	13.1487	46.6317	-0.346389	-0.470031	0
-889.255	0.0566732	-0.187072	25.9618	-0.698521	-0.456632	-0.260066	-0.139787	20.5571	-0.672818	-1.07061	-0.84106	0
-802.547	0.093972	-0.106987	24.1721	-0.278525	-0.35006	-0.092439	-0.122586	18.3467	-3.09331	-0.928457	-0.561739	0
-344.227	0.06793	-1.08584	15.8693	-1.90146	0.359518	-0.945607	-0.253967	12.773	6.43003	-0.60979	-0.897811	0
-60.9597	0.040923	-0.413133	29.1025	-6.17452	-0.01742	-0.785145	-0.212145	0.622724	-5.15228	-0.279879	-0.280098	1
-684.613	0.042897	0.00813	23.5474	-0.304384	-0.136835	-0.115873	-0.093226	7.72407	-0.085249	-0.571399	-0.060472	1
-193.232	0.054314	0.012743	-10.7388	-0.484631	-0.224308	-0.229566	-0.098342	17.5054	-4.4309	-0.612906	-0.474905	0
-195.876	0.056741	-0.280732	-2.35367	-1.02235	0.062886	-0.264605	0.094536	17.5608	-1.54306	-0.729281	-1.01865	0
-295.24	0.038701	-1.81072	15.7594	-2.93945	-0.160947	-1.92008	-0.439339	18.9146	13.921	-0.181124	-0.553383	0
18.6591	0.061841	-0.596805	7.08662	-1.18571	-0.399682	-0.574212	-0.150453	16.8321	50.032	-0.695196	-0.578363	0
-643.372	0.071064	-0.781478	9.85984	-2.3124	0.15069	-1.22103	-0.12649	16.1538	17.6692	-0.556077	-0.593787	0
-555.519	0.069388	-0.581802	10.112	-1.31313	-0.331471	-0.860078	-0.183782	17.7542	22.0121	-0.560803	-0.713997	0
-227.464	0.076485	-0.700815	11.1403	-2.47424	0.356207	-0.790249	0.266307	18.6959	23.0064	-0.769664	-0.762766	0
-46.3854	0.053962	-1.1027	5.46693	-1.97058	1.31422	-0.785145	0.328277	13.5673	-8.55809	-0.441238	-0.18633	0
-521.769	0.036851	-0.413133	5.83032	-7.23113	0.179931	-0.785145	-0.693385	22.9314	-7.88474	-0.03976	-0.280435	0
48.5176	0.022506	-0.898892	0.964659	-5.32984	-0.460433	-2.51941	-0.70361	23.7509	-27.4308	0.041471	-0.520045	0
24.0846	0.061509	0.080817	10.5566	0.846159	0.073624	-0.158165	0.038301	11.5434	16.527	-0.452309	-0.406951	0
-326.019	0.061975	0.065961	8.22905	0.375953	0.088022	-0.325293	0.064901	13.6667	14.3196	-0.416948	-0.451893	0
-370.188	0.045854	-0.671032	6.78112	-2.07073	0.455485	-0.822203	0.162234	16.1794	14.9744	-0.524421	-0.643482	0
-211.142	0.055972	0.032809	4.47872	0.033373	0.032801	-0.068274	0.035729	15.0894	21.1262	-0.521446	-0.536371	0
-240.95	0.051189	0.025922	9.71795	-0.229937	-0.06875	-0.160988	-0.032468	12.6448	19.5975	-0.486335	-0.6326	0
64.0017	0.048951	-1.11002	12.079	-4.31845	0.71376	-1.47972	0.427061	13.4067	-16.294	-0.407759	-0.022522	0
-278.841	0.043454	-0.390666	9.72704	-5.4031	0.179931	-2.28646	-0.212145	14.6197	-16.5405	-0.427333	-0.347425	0
-388.953	0.062277	-1.00798	12.745	-5.87132	0.179931	-0.785145	-0.212145	9.25901	-19.1063	-0.450815	-0.277347	0
-99.0827	0.047579	0.016028	13.4497	0.113824	-0.62067	-0.115919	-0.128776	13.236	-2.04678	-0.437968	-0.929955	0
44.8064	0.050635	-0.470541	7.27406	-2.75584	0.460273	-1.20719	0.155987	13.6321	-3.37794	-0.286443	-0.638065	0
-463.766	0.047365	0.012848	8.72176	-0.098851	-0.444903	-0.085485	-0.116	17.7782	0.051926	-0.412247	-1.16844	0
-416.611	0.050542	-0.782529	11.7396	-1.60118	-0.51287	-0.501991	-0.241746	-3.81216	8.36163	0.014413	-0.153959	0
-375.971	0.046776	-0.800132	13.3318	-2.90116	0.064127	-1.17125	0.120846	-6.93776	12.1544	-0.541252	-0.530429	0
-161.185	0.042832	0.032139	8.46091	0.604875	-0.230704	0.155712	0.029586	-5.86498	7.51808	0.034714	0.015772	0

## Sheet: RIGHT direction
left hip angle(X)	left knee moment(Z)	right ankle moment(Y)	Injury Label 1=YES，0=NO
53.9692	0.004863	0.173957	1
68.3584	0.075506	-0.684454	1
83.927	0.053322	-1.0276	1
92.0162	-0.174982	-1.11616	0
92.1821	-0.174982	-1.45608	0
94.5229	-0.344876	-1.45857	0
80.0778	-0.085439	-0.149138	0
67.282	-0.12731	-0.200331	0
81.549	-0.07419	-0.77387	0
60.0788	-0.077447	-0.48058	0
68.8426	0.065167	-0.224591	1
71.4725	0.132725	-0.029319	1
64.1594	-0.093614	0.113371	1
98.3854	0.069517	-1.81689	0
52.5204	-0.174982	-0.44325	0
59.9589	-0.174982	-0.471085	0
47.5942	-0.174982	-0.191801	0
89.8966	-0.022203	-0.452471	0
107.326	-0.02351	-0.576777	0
103.448	-0.044398	-1.17867	0
63.6741	0.130712	-0.158788	0
78.3132	-0.104829	-0.628431	0
74.9403	0.022648	-1.40009	1
74.8293	0.006025	-0.490346	1
114.083	-0.318105	-1.34492	1
110.969	-0.174982	-1.39152	0
80.3321	-0.174982	-0.417704	0
76.1401	-0.109813	-0.656089	0
73.0688	-0.059754	-1.2344	0
65.6039	-0.174982	-0.453026	0
93.0173	-0.325289	-0.703651	0
86.215	-0.213924	-0.706199	0
87.6163	-0.174982	-0.564833	0
76.1425	-0.024193	-0.590575	0
82.1154	-0.174982	-0.84514	0
51.8382	-0.174982	0.015054	0
77.1504	-0.04628	-1.0031	0
93.3541	-0.154872	-1.31373	0
58.1505	-0.174982	0.129927	0
57.8237	-0.174982	-0.120972	0
66.2255	-0.174982	0.640555	0
73.177	0.007091	-1.8473	0
104.162	0.059121	-0.325341	1
108.675	-0.345458	-1.79511	1
100.795	-0.049455	-1.48775	1
71.7718	0.152943	-0.493577	0
95.2907	-0.131966	-0.980353	0
78.9941	-0.174982	-0.236284	0
67.9607	-0.174982	-0.263694	0
72.3731	0.043954	-0.388892	0
71.711	0.076597	-0.373772	0
72.2397	-0.100519	-0.699246	1
76.1425	-0.174982	-0.578768	1
74.9135	-0.219304	-0.852731	1
95.7689	-0.153039	-1.66409	0
93.1972	-0.095848	-1.08679	0
79.8892	-0.100643	-0.171661	0
89.4141	-0.103234	-0.242836	0
83.3321	-0.069363	-0.241404	0
86.884	-0.174982	-0.390479	0
85.2226	-0.174982	-0.380158	0
100.207	0.016255	-1.07744	0
66.9614	-0.174982	-0.141204	0
77.04	-0.174982	-0.117152	0
86.4763	-0.051393	-0.621433	0
71.6687	0.052289	-0.451265	0
60.6474	0.044757	-0.308953	0
89.2883	-0.308072	-1.56083	0
67.0936	-0.174982	-0.01204	0
94.169	-0.174982	-0.344804	0
63.7981	0.032628	-0.558144	0
77.3008	-0.074007	-0.348073	0
82.1125	-0.174982	-0.020682	0
90.7128	-0.174982	-0.477917	0
83.9022	-0.174982	-0.597042	0
53.899	-0.174982	-0.691769	0
85.5197	-0.045997	-0.146632	0
64.1151	0.021961	-0.827035	0
66.9389	-0.174982	-0.517268	0
73.7387	-0.10356	-0.476371	0
62.9153	-0.174982	-0.204832	0
67.0759	0.008754	-0.74697	0
44.5079	-0.233047	-0.480063	0
72.1448	-0.105832	-0.217048	0
73.5396	-0.174982	-0.312115	0
102.372	-0.026042	-1.5123	1
81.067	-0.019023	-0.102152	1
80.2103	-0.174982	-0.174877	1
85.4467	-0.174982	-0.332849	0
57.87	-0.120364	-0.59843	0
44.2057	-0.174982	-0.302532	0
44.1025	-0.009612	-0.486795	0
73.4344	0.219844	-0.581927	0
73.4344	0.180012	-0.765912	0
73.4344	0.197324	-0.721689	0
61.5217	-0.174982	-0.522492	0
67.382	-0.014829	-0.464779	0
61.4026	-0.174982	-0.437051	0
63.4426	-0.210717	-0.522742	0
67.765	-0.331695	-0.465225	0
63.8464	-0.174982	-0.484613	0
62.4767	-0.069133	-0.292707	0
87.056	-0.174982	-0.542453	0
100.85	-0.032813	-0.34883	0
93.0522	-0.174982	-0.475655	0
70.4662	-0.174982	-0.398112	1
75.546	-0.174982	-0.332262	1
79.2351	-0.037166	-0.195336	1
65.4346	-0.174982	-0.326637	0
68.1387	-0.011792	-0.285521	0
56.8896	0.059878	-0.25322	0
58.1941	-0.174982	-0.290153	0
56.1362	-0.174982	-0.009136	0
79.7579	-0.174982	-0.125435	0
99.7921	-0.02389	-1.28468	0
90.3487	-0.005603	-0.322741	0
66.1674	-0.017353	-0.437109	0
61.5819	-0.190332	-0.38902	0
65.0868	-0.174982	-0.524555	0
107.375	0.023698	-1.32759	0
79.7205	0.007721	-0.296287	0
104.43	-0.106907	-1.41454	0
82.3733	-0.174982	-0.413265	0
84.9789	-0.009768	-0.361438	0
80.6662	-0.01211	-0.400163	0
72.7157	-0.013028	-0.102745	0
73.2747	-0.174982	-0.163999	0
76.1838	-0.174982	-0.099135	0
73.7111	-0.030529	-1.19909	0
71.5074	-0.174982	-0.202974	0
76.2092	-0.174982	-0.36578	0
51.6419	-0.008424	-0.942656	0
62.8947	-0.027984	-0.669611	0
59.4345	-0.174982	-0.575613	0
65.8008	-0.087832	-0.133202	0
77.6635	-0.075724	-0.09172	0
72.0411	-0.084556	-0.215031	0
94.0852	-0.065094	-1.48833	0
96.0342	-0.075276	-1.28953	0
87.0322	-0.028497	-1.11992	1
67.0933	-0.052007	-0.374301	1
87.9043	-0.058833	-0.440936	1
87.9712	-0.174982	-0.507571	0
75.3486	-0.068812	-1.33594	0
52.285	-0.119178	-0.110232	0
62.0009	-0.174982	-0.087302	0
77.3257	-0.174982	-0.413759	0
86.1154	-0.174982	-0.277217	0
78.6966	-0.136323	-0.357936	0
86.2393	-0.152064	-1.26102	0
91.0222	-0.091166	-1.06544	0
58.541	-0.174982	0.069174	1
58.6291	-0.043719	-0.486193	1
55.8906	0.078749	-0.634578	1
42.4302	0.197207	-0.657816	0
73.4344	-0.014663	-0.802693	0
73.4344	-0.003925	-0.701398	0
73.4344	0.068242	-0.533529	0
58.334	-0.174982	-0.109142	0
61.943	-0.174982	-0.486771	0
55.5062	-0.027406	-0.757718	0
69.4417	-0.074262	-1.21207	0
70.9225	-0.127902	-1.12063	0
65.8303	-0.015704	-1.44022	0
91.5454	0.055606	-0.628431	0
49.6124	-0.072549	0.478047	0
56.4881	-0.043613	-0.104553	0
63.0559	-0.174982	-0.52711	0
74.1088	-0.109697	-0.816119	0
67.9525	0.0089	-0.475802	0
55.0598	-0.014221	-0.264775	0
85.6441	-0.02121	-1.4871	0
82.7351	-0.096172	-0.931434	0
58.7313	-0.048771	-0.451376	0
56.2459	-0.174982	-0.146725	0
60.1644	-0.034773	-0.22558	0
68.0572	0.134634	-1.27177	0
71.5264	-0.121072	-1.4592	0
56.1845	-0.041582	-0.296754	0
62.7527	-0.174982	-0.351305	0
62.1822	-0.002354	-0.911069	0
69.3472	-0.174982	-0.199166	0
51.4246	-6.3e-05	-0.978139	0
72.2121	0.019986	-0.997378	0
56.8952	-0.008988	-0.763081	0
54.3287	-0.053038	-0.525103	0
55.3753	-0.026525	-0.483998	0
44.9909	-0.174982	-0.4443	0
67.9839	-0.111705	-0.302834	0
75.7902	-0.174982	-0.455723	0
71.7674	-0.005848	0.101253	0
57.2598	-0.01316	0.00581	0
71.3807	-0.092583	-0.570605	0
84.4625	-0.107094	-1.15055	0
81.2486	-0.099742	-1.42484	0
55.3793	0.060731	-1.51337	0
83.8323	-0.056313	-0.45733	0
75.8465	-0.086997	-0.387388	0
77.9036	-0.005445	-0.557118	0
70.8171	-0.174982	-0.080927	0
66.7518	-0.174982	-0.109848	0
67.5622	0.040334	-1.07061	0
83.7876	-0.174982	-0.443549	0
75.4132	-0.008794	-0.782864	0
48.8369	0.168192	-1.17633	0
79.506	0.008965	-0.188761	0
73.4344	0.014305	0.110105	0
98.0975	0.011774	-0.476052	0
85.814	-0.174982	-0.253598	0
68.2734	-0.130417	-0.561556	0
57.9995	-0.174982	-0.333006	0
55.962	-0.031114	-0.451977	0
81.8537	-0.150055	-0.485885	0
65.8053	0.021577	-1.34695	0
51.6014	-0.004863	-0.364469	0
84.609	-0.052084	0.008506	0
56.3163	-0.0138	0.007328	0
79.8136	-0.136156	-0.763784	0
85.2725	-0.018926	-1.15274	0
97.9742	-0.137197	-1.25362	0
87.2537	-0.174982	-0.230554	0
94.8598	-0.051347	-1.59393	0
93.9041	-0.082104	-1.48541	1
91.408	-0.131658	-1.7377	1
71.1515	-0.029787	-0.221105	1
67.7669	-0.10162	-0.512352	0
66.1622	0.027529	-0.506119	0
77.7914	-0.079178	0.126976	0
78.4577	-0.055834	-0.284737	0
77.1409	-0.114082	-0.851763	0
90.8575	-0.176559	-0.711619	0
83.941	-0.068637	-0.450966	0
67.1615	-0.027758	-0.817712	0
88.0001	-0.168399	-0.939188	0
77.4073	-0.052564	-0.007287	0
87.1659	-0.174982	-0.320038	0
84.7913	-0.023835	-0.488548	0
83.901	-0.062349	-0.806962	0
67.6538	-0.072743	-0.827085	0
86.3907	-0.026427	-1.20043	0
78.7606	-0.174982	-0.647821	0
76.9317	-0.028559	-0.515936	0
61.9794	0.109916	-0.744115	0
48.5967	-0.174982	-0.684596	0
65.4488	0.081729	-0.752694	0
76.7342	-0.029048	-0.321322	0
84.57	-0.174982	-0.227986	0
63.3602	0.146166	-1.21099	0
77.0778	0.015342	-1.25168	0
77.1815	0.042793	-1.24608	0
92.9529	0.003018	-1.73547	0
83.979	-0.174982	-0.638469	0
78.4327	-0.174982	-0.276693	0
71.7491	0.009903	-0.175611	0
78.1316	-0.314756	-0.89053	0
79.5414	-0.174982	0.009731	0
87.1441	-0.174982	-0.624864	0
102.933	-0.038062	-1.63163	0
101.363	-0.124452	-1.51639	0
92.894	0.019284	-1.3753	0
90.6126	-0.178478	-0.573668	0
78.9242	-0.039922	-0.702938	0
77.0321	0.160579	-0.720685	0
69.8725	-0.019012	-0.839246	0
85.7837	-0.125923	-0.813422	0
66.4336	-0.149783	-0.172572	0
89.0006	0.031644	-0.167842	0
109.875	-0.174982	-1.56431	0
103.086	-0.174982	-0.309724	0
68.9656	0.061544	-1.01645	0
73.4344	-0.110494	-0.628431	0
92.7266	-0.047935	-1.0783	0
104.071	-0.125279	-1.87817	0
91.6966	0.088762	-0.646531	0
101.354	-0.218262	-1.19145	1
81.6576	-0.162892	-0.81833	1
92.5475	-0.083321	-1.05679	0
82.6601	-0.084934	-0.822401	0
77.4864	-0.121509	-1.22269	0
76.1505	-0.0012	-1.20696	0
83.3938	0.020521	-1.36834	0
83.8132	0.138532	-0.039793	0
101.071	-0.134921	-0.895255	0
87.6486	-0.174982	-0.024802	0
69.2108	-0.076568	-0.737576	0
67.0936	-0.174982	0.005801	0
78.9114	-0.053756	-1.58513	0
85.6718	-0.176375	-0.628431	0
56.5942	-0.174982	-0.47321	0
53.891	-0.174982	0.020312	0
58.756	-0.174982	-0.354693	0
78.3801	0.026166	-0.518012	0
83.8904	-0.174982	-0.549968	0
83.6433	-0.02236	-0.345677	0
67.0544	0.257075	-0.23341	0
81.6766	-0.080668	-1.25855	0
71.0529	-0.094774	-1.87063	0
73.4344	-0.025993	-0.605348	0
73.4344	-0.174982	-0.492972	0
68.4837	-0.059203	-0.894144	0
