# Supplementary material for: Prediction of ACL injury incidence and analysis of key features in basketball players based on multi-algorithm models
Source: PeerJ. 2025 Oct 14;13:e20141. doi: 10.7717/peerj.20141 (PMC12533536; doi:10.7717/peerj.20141)
Supplement: Supplemental Information 7 [file peerj-13-20141-s007.xlsx]

## Sheet: LIFE direction
L-knee angle(Z)	L_right-SHARK_ANGLE(X)	L-ankle-angle(Z)	L_ankle-moment(X)	L_hip-angle(X)	L- knee moment(X)	L- knee moment(Y)	L- knee moment(Z)	Injury Label 1=YES，0=NO
0.855264	32.1935	-2.89279	0.028624	59.6758	-0.19503	-0.029997	-0.065111	1
-3.18969	33.6929	-0.684672	0.026652	49.9527	-0.120704	0.032085	-0.064483	1
-2.5149	32.3656	1.1768	0.030392	55.9161	-0.231694	-0.057507	-0.075644	1
-30.4015	52.4568	-8.02196	0.012715	40.6704	-0.075069	0.033905	-0.030012	0
-19.6241	18.8986	-7.92212	0.024618	86.9707	-0.087849	0.038666	-0.038262	0
-37.1025	53.2158	-1.59697	0.029758	47.5569	-0.140549	0.03826	-0.033283	0
-29.4631	20.6144	14.8327	0.009452	56.7626	-0.074013	-0.089767	0.022289	0
-24.4721	8.87819	14.3696	0.010167	48.568	-0.045346	-0.107722	0.032086	0
-22.8107	36.5183	-2.9125	0.026778	76.3759	-0.157363	-0.047557	-0.059081	0
-14.486	36.5183	-23.2517	0.339808	95.1245	-0.0955264	0.0272181	-0.0233171	0
-17.5961	18.9209	-3.78017	0.030876	70.729	-0.147213	0.074999	-0.021821	1
-13.9064	23.3212	-3.22021	0.027489	72.3613	-0.170172	0.014415	0.00628	1
-21.7019	24.0695	-1.05304	0.032454	62.8735	-0.044538	0.063196	-0.027722	1
-14.486	21.4316	6.4361	0.008024	54.1934	-0.0955264	0.077232	0.035274	0
2.19318	42.5286	1.1768	0.016841	58.4817	0.016841	0.000188	-0.003032	0
19.2037	47.4661	-19.7086	0.018008	45.7311	0.018008	0.012381	0.004772	0
-17.5842	50.0091	-1.74728	0.010492	34.5624	-0.116079	-0.029845	0.027428	0
-18.0002	55.5723	-5.43145	0.008603	39.5805	-0.153913	-0.047697	0.032295	0
-18.2253	50.8384	-3.96017	0.013408	29.5158	-0.116142	-0.038608	0.031524	0
-19.3972	7.77094	-2.57714	0.339808	102.291	-0.144796	0.053834	-0.043807	0
-19.9567	6.60212	-2.32792	0.339808	98.3635	-0.179552	0.088905	-0.055195	0
-18.3918	2.10478	-2.60864	0.339808	103.824	-0.227483	0.067705	-0.025432	0
-35.8296	18.1447	-6.7205	0.038466	80.7037	-0.0955264	0.109928	-0.102016	1
-21.9949	12.5247	-4.76239	0.036572	68.6301	-0.0955264	0.090407	-0.067401	1
-26.1512	13.5888	-7.17804	0.035164	66.1648	-0.166256	0.074814	-0.039242	1
-12.4286	26.4644	-5.83825	0.022148	75.8837	-0.093003	-0.010517	-0.024487	0
-20.6057	59.1404	-3.76387	0.012481	37.7893	-0.074395	0.06008	-0.062797	0
-14.0734	25.2338	-6.4045	0.021952	79.019	-0.06422	0.010394	-0.023507	0
-22.2469	24.4053	5.19418	0.031883	78.8659	-0.196308	0.104089	-0.028524	0
-21.0239	26.7289	7.81276	0.035744	63.7635	-0.101432	0.076944	-0.035785	0
-0.093567	23.6488	26.0916	0.025617	70.107	0.053989	-0.014234	-0.0233171	0
-42.5453	46.8607	21.7633	0.013803	49.729	-0.117136	0.088154	-0.060243	0
-56.007	34.0805	19.1902	0.010384	64.5303	-0.030936	0.031664	0.008914	0
-41.4742	41.4442	16.5914	0.016635	40.9229	-0.062247	0.038102	-0.004579	0
-10.2675	33.2459	6.82162	0.339808	100.599	-0.246333	0.0272181	-0.0233171	0
-6.96738	18.1311	1.00079	0.339808	85.6032	-0.100506	0.0272181	0.072141	0
-25.4624	36.5183	5.38664	0.339808	60.245	-0.0955264	-0.048488	-0.0233171	0
-24.8525	45.6533	8.57659	0.01674	34.8868	-0.134675	0.02408	0.003136	0
-29.0846	49.195	11.8815	0.013004	41.808	-0.128369	0.026839	0.001832	0
-30.3231	49.4537	11.018	0.013244	34.6724	-0.106057	0.043478	-0.011545	0
4.82656	51.7265	8.64709	0.015789	28.0861	-0.143532	0.061248	-0.029215	0
6.9824	39.1975	12.7757	0.014055	53.3669	-0.0955264	0.108254	0.003502	1
-14.486	24.1332	1.1768	0.024668	81.3391	-0.050883	-0.046746	-0.006402	1
-41.5091	45.1682	9.7535	0.015228	55.837	-0.117904	0.035806	-0.042737	1
-24.6695	53.1729	0.025676	0.032295	36.0958	-0.064388	0.015989	-0.018443	0
-18.0348	52.0904	-2.84016	0.035481	33.6545	-0.008992	-0.022069	0.019003	0
-26.3713	51.4207	-3.26198	0.033888	67.9437	-0.03669	-0.00304	0.00028	0
-24.6695	53.1729	0.025676	0.032295	36.0958	-0.064388	0.015989	-0.018443	0
-23.4141	56.7827	-1.03375	0.027788	40.6566	0.059125	0.055789	-0.043114	0
-21.7324	53.1337	-1.76585	0.030485	38.3595	-0.003815	0.086077	-0.051341	0
-23.7264	45.6911	5.38887	0.018807	44.3403	-0.238632	0.083869	-0.087242	1
-50.6489	39.4435	8.26495	0.01339	54.1934	-0.190675	0.121649	-0.034724	1
-24.0057	44.1424	3.94429	0.020226	37.4845	-0.15039	0.074715	-0.06438	1
-23.6171	47.9255	0.60481	0.339808	37.9102	-0.0955264	0.0272181	-0.0233171	1
-21.0615	52.8025	6.59143	0.017641	59.3286	-0.121541	-0.002958	-0.014884	0
-24.1958	52.7668	7.946	0.019271	51.7272	-0.157478	0.019569	-0.026485	0
21.0625	51.9763	4.18382	0.01615	60.4065	-0.099353	-0.020503	0.028299	0
-15.0014	49.7074	5.78236	0.018812	71.752	-0.130895	-0.010098	-0.027493	0
-13.6502	56.6625	5.61055	0.012392	70.1594	-0.160618	-0.013892	-0.019366	0
-16.5319	49.1681	6.12748	0.017567	86.2623	-0.082621	-0.012664	-0.000756	0
-33.4761	28.4099	17.9675	0.013379	69.8831	-0.107836	-0.029844	-0.016956	0
-30.6658	40.1587	11.9928	0.016678	62.906	-0.061348	0.02518	-0.043353	0
-29.9831	31.1565	8.35971	0.015755	59.2739	-0.030068	-0.004199	-0.002759	0
-27.2156	42.9337	-5.96556	0.017086	37.2254	-0.102981	-0.011551	0.012759	0
-26.627	40.1308	-8.03967	0.016105	36.6124	-0.041401	-0.035746	0.038251	0
-26.9297	42.4506	-8.66717	0.01688	40.9129	-0.073891	-0.021384	0.020358	0
0.205164	43.9734	-2.97729	0.009795	51.0606	-0.100676	0.021273	-0.009884	0
0.905975	46.9238	-2.40977	0.009726	56.9528	-0.073633	0.016073	-0.007849	0
1.66539	43.4983	-3.35229	0.022108	22.5586	-0.00078	-0.067303	0.038837	0
-38.8617	22.6307	2.74173	0.018203	61.0707	-0.088717	-0.018767	0.021297	0
-40.0009	27.9827	6.91922	0.01727	54.9017	-0.105627	-0.02389	0.027587	0
-37.2577	35.264	7.99726	0.017103	55.4686	-0.153848	-0.033911	0.021964	0
-35.2308	45.8827	-2.19295	0.011636	52.3698	-0.06709	0.029256	-0.030058	0
-14.486	37.9982	-0.50292	0.010922	57.2691	-0.01664	-0.008126	-0.002001	0
-41.531	35.9262	1.45965	0.011346	50.5598	-0.055512	0.005435	-0.002749	0
-43.5009	39.3733	-1.92786	0.009727	45.6707	-0.069439	-0.016637	0.013985	0
-42.721	35.9406	-1.71554	0.008631	41.683	-0.063349	-0.039522	0.030862	0
-39.7875	33.1301	-0.294464	0.010512	41.4106	-0.011344	-0.032785	0.028857	0
22.7112	46.8158	25.7242	0.339808	73.6247	-0.0955264	-0.106591	-0.0233171	0
8.05056	39.8941	10.3417	0.018818	53.6144	-0.071317	0.08079	-0.042022	0
8.41514	45.9274	18.2207	0.01985	73.6986	-0.077601	0.049031	-0.027383	0
-26.819	33.5604	7.15708	0.013216	69.9075	-0.048764	-0.002445	0.023907	0
-13.4468	15.0898	-4.68407	0.013167	86.1072	-0.0955264	0.0272181	-0.040976	0
-17.0864	18.2206	1.01435	0.027616	81.3053	-0.0955264	0.0272181	-0.095479	0
-24.6212	25.3824	-0.156291	0.339808	86.4848	-0.155001	0.072753	-0.037499	1
-23.5644	23.6551	-1.15887	0.339808	85.0333	-0.188738	0.036931	-0.031463	1
-32.9271	52.2931	8.4137	0.015908	43.9161	-0.101577	0.071018	-0.039268	1
-32.9445	55.0752	4.53833	0.013566	57.739	-0.205307	0.00252	0.027206	0
-29.9153	40.872	3.96387	0.023304	84.7434	-0.140118	0.079484	-0.069833	0
-31.8025	46.747	10.0523	0.017707	55.6015	-0.23002	0.027915	-0.003565	0
-39.2319	30.8002	11.5169	0.025314	63.7688	-0.150327	0.001845	-0.038641	0
-34.8264	29.0873	9.06635	0.030188	58.2982	-0.193588	-0.004519	-0.055649	0
-38.4512	24.3612	-0.753743	0.030483	66.7304	-0.166969	-0.002624	-0.065103	0
16.5171	40.5706	-0.390356	0.023736	14.3411	0.023736	-0.008589	-0.000694	0
-27.8538	35.6826	0.399643	0.021383	22.3262	0.040207	-0.00841	0.017251	0
-29.0173	33.3553	-2.38065	0.021907	16.691	0.011437	-0.007422	0.008102	0
-33.5612	30.5357	2.4276	0.012187	41.9873	-0.067198	-0.009303	-0.00251	0
-34.483	26.1743	4.75331	0.010141	46.051	-0.064878	-0.028259	0.016571	0
2.92487	27.1736	2.82077	0.011056	47.2484	0.064392	-0.00756	0.023216	0
-54.4691	36.5183	1.1768	0.026231	55.2446	-0.070914	-0.013198	-0.0233171	0
-53.9514	35.602	4.60005	0.013714	63.2407	-0.092045	0.04942	-0.010482	0
-23.0002	50.4754	0.410103	0.003025	29.509	-0.214814	0.156935	-0.067936	0
-24.1057	51.9926	-1.64932	0.010731	36.3905	-0.143141	0.082609	-0.051548	0
-23.6053	42.3784	-0.543097	0.022693	40.8079	-0.029613	0.041358	-0.018267	0
-13.8695	42.1048	3.17678	0.01202	51.7446	-0.108488	-0.009618	0.007254	1
-20.8114	35.0395	1.14473	0.013075	63.1484	-0.102426	-0.021544	0.013772	1
-22.8274	34.6841	2.04366	0.012116	57.1034	-0.116451	-0.023338	0.014144	1
-36.2405	33.2923	1.93828	0.017902	38.658	-0.049783	-0.015525	0.012894	0
-38.338	35.9951	4.57779	0.017518	36.9076	-0.039292	-0.007677	0.001727	0
-32.4819	29.2274	1.28289	0.018234	28.7956	-0.055574	-0.018722	0.01485	0
-39.7122	28.4175	1.55839	0.01528	39.7738	-0.078551	-0.031056	0.022139	0
-24.8695	25.5549	0.936449	0.029704	64.0453	-0.119663	0.065771	-0.057442	0
-26.6011	34.3147	0.818365	0.029046	57.5651	-0.090522	0.067038	-0.055762	0
-27.2246	31.1106	-0.640656	0.028125	59.7045	-0.185367	0.079251	-0.064878	0
-7.34336	33.5471	-2.05025	0.016052	68.6718	-0.098173	-0.019615	-0.012357	0
-5.59294	41.1093	-7.02176	0.017846	61.8651	-0.051492	0.03952	-0.045131	0
22.0735	33.3831	-9.2462	0.017656	58.1039	0.017656	0.005913	0.001748	0
19.9542	42.6359	8.68808	0.01635	41.7458	0.01635	0.00416	0.00718	0
-9.80639	42.8748	9.39495	0.015451	54.1934	-0.149175	0.077539	-0.020994	0
20.7708	41.5124	8.75601	0.018047	34.9858	0.018047	0.006006	0.005142	0
-2.14691	13.2573	-6.72478	0.339808	102.978	-0.248793	0.038544	-0.011126	0
-2.8991	11.8741	-1.96124	0.339808	95.1726	-0.043398	0.083289	-0.034729	0
1.94572	5.07855	-4.4704	0.339808	100.586	-0.124141	0.098836	-0.043836	0
-3.67273	21.4607	17.2926	0.02175	81.0167	-0.115633	0.083324	-0.009163	0
-3.28539	22.6955	17.5808	0.023015	65.5816	-0.056127	0.066942	-0.022332	0
-3.90074	24.1528	17.5518	0.023191	75.3945	-0.078597	0.075576	-0.01346	0
-3.75092	40.5621	-12.0334	0.028859	82.4269	-0.148186	0.053103	-0.084217	0
-5.70399	46.2053	-9.11925	0.018352	52.1196	-0.184825	0.053157	-0.036039	0
-3.70139	45.683	-3.85782	0.021513	52.6343	-0.23611	-0.03357	0.00256	0
-5.37479	51.0191	-10.4605	0.012745	33.8697	-0.123648	-0.010408	0.028182	0
-5.41829	56.3156	-16.7223	0.010515	38.4665	-0.166345	-0.03422	0.040502	0
-6.00396	51.9901	-13.7766	0.015977	28.7677	-0.127749	-0.018594	0.032256	0
-4.1695	34.1075	-7.40207	0.020047	44.1753	-0.083943	0.026014	-0.007583	0
-4.90993	30.6208	-2.78131	0.018149	48.2329	-0.087067	0.006021	0.014133	0
-5.14964	30.9194	-4.70849	0.01913	49.4066	-0.052368	0.019815	0.001065	0
2.87664	47.0009	-2.67252	0.021791	67.0818	-0.11603	-0.052864	-0.022053	0
0.258606	45.9558	-2.53471	0.0215355	76.824	-0.0925415	-0.045448	-0.0132925	0
0.319992	47.0992	-2.36208	0.02128	81.6253	-0.069053	-0.038032	-0.004532	0
-4.80911	25.5174	-0.183821	0.339808	88.4104	-0.139577	0.113155	-0.041908	1
-11.7198	40.4257	1.97874	0.014515	65.2344	-0.083631	0.042714	-0.010586	1
-3.53822	24.0671	-3.15323	0.339808	86.7968	-0.182351	0.082399	-0.031345	1
-0.115932	50.2922	1.911	0.029913	33.651	-0.00598	-0.016422	-0.003995	0
-0.789268	49.844	0.765425	0.022295	36.1033	0.001678	0.022824	-0.021091	0
-5.70644	49.8072	-1.24032	0.0215545	68.091	-0.037939	0.004484	-0.0070285	0
-8.34677	24.2892	-20.7952	0.020814	52.9678	-0.077556	-0.013856	0.007034	0
-13.8461	21.2501	1.1768	0.022328	58.3801	-0.085641	-0.007295	0.009438	0
-6.91505	35.2529	-10.4115	0.020251	31.0307	-0.013222	-0.049152	0.030709	0
-0.22131	48.924	26.5799	0.002648	31.6706	-0.143777	0.0272181	-0.051116	0
0.221347	50.5691	22.9253	0.012405	33.5909	-0.144276	0.078148	-0.007685	0
-0.390971	52.2004	24.2828	0.009784	48.7168	-0.092773	0.112677	-0.048399	0
-27.5674	33.2748	5.00413	0.339808	97.5109	-0.148342	0.0272181	-0.0233171	1
-17.7033	11.0444	-17.3234	0.02481	82.4318	-0.042361	0.0272181	0.045984	1
-7.5748	5.25943	-15.8897	0.339808	78.1234	-0.004673	0.0272181	-0.0233171	1
-9.9896	25.0235	-9.55419	0.017636	58.8253	-0.060999	-0.024169	0.012401	0
-10.9447	31.9984	-5.66126	0.017558	52.6231	-0.073879	-0.030297	0.015693	0
-9.86579	32.4185	-4.07396	0.017134	56.5551	-0.076564	-0.0424	0.01563	0
1.12406	39.5744	-1.29274	0.0214915	20.156	-0.0685795	-0.011057	0.001702	0
5.01878	37.2526	-0.483134	0.025849	10.5611	-0.060595	0.020286	-0.012226	0
-3.42062	35.8072	-0.639621	0.02675	10.9997	-0.05183	0.018269	-0.009192	0
0.860352	15.5119	-4.04693	0.011965	84.2319	-0.0955264	0.0272181	0.004126	0
-2.10902	19.0048	1.76709	0.023935	79.5043	-0.0955264	0.0272181	-0.038647	0
-16.8615	56.758	15.5125	0.013724	64.3561	-0.105919	-0.030692	0.032746	0
3.22142	42.2391	-20.9997	0.016587	19.8698	0.009664	-0.015206	0.000418	0
-3.20779	46.7195	1.1768	0.339808	28.4877	-0.061941	-0.039352	-0.021155	0
1.24652	37.4426	-20.2313	0.008432	27.8205	-0.025829	-0.009881	0.007252	0
-31.4612	9.67394	1.1768	0.339808	92.5271	-0.0955264	0.0272181	-0.0233171	0
5.64273	51.2949	1.1768	0.339808	68.5041	-0.0955264	0.029556	-0.0233171	0
2.34384	42.0326	1.1768	0.025374	47.5796	-0.093665	0.002579	-0.009912	0
-0.510653	45.8311	1.1768	0.021662	68.4213	-0.094341	-0.016674	-0.010501	0
6.14469	41.7509	-2.55204	0.016191	55.3509	0.016191	0.001087	0.001803	0
2.90692	42.944	-3.68272	0.012143	55.4045	-0.06838	-0.000822	0.004722	0
3.60997	45.3961	-6.07272	0.012538	59.3753	-0.062632	-0.002257	0.005358	0
-26.0055	41.8945	27.819	0.011999	73.7664	-0.106736	0.033097	0.043231	0
26.5717	42.1691	1.1768	0.017424	64.1994	0.017424	0.008138	0.000994	0
-16.7944	62.9874	24.1849	0.014322	39.7737	-0.126989	-0.060701	-0.035371	0
-18.4485	32.0591	-5.08366	0.020593	39.2222	-0.079335	-0.019905	0.019994	0
-13.5155	31.4271	-4.11371	0.023292	28.6604	-0.060019	-0.000291	0.010914	0
-15.5707	29.4911	8.11886	0.03329	66.1539	-0.113913	0.099099	-0.058123	0
-16.5732	36.6783	8.51396	0.032965	59.5662	-0.084948	0.093603	-0.060884	0
-17.1835	33.8305	6.8407	0.031935	61.9186	-0.176345	0.115017	-0.054141	0
6.16245	36.7726	8.38964	0.000233	55.516	-0.11713	0.021961	-0.061507	0
8.01451	31.6189	7.72531	0.000263	61.9462	-0.180984	-0.017279	-0.053762	0
4.80544	33.3201	8.55251	0.000234	51.787	-0.114146	0.041284	-0.057621	0
1.83027	49.4287	-7.34925	0.013537	45.2696	-0.080432	0.030436	0.007762	0
10.8957	11.3731	-8.66426	0.01444	29.1007	-0.056948	0.016974	0.0099265	0
3.10173	41.2006	-8.63189	0.015343	53.5581	-0.033464	0.003512	0.012091	0
-27.1714	39.5197	-7.01498	0.01775	39.1432	-0.084829	0.020074	0.020249	0
-17.4543	43.6617	-7.9018	0.015751	53.4789	-0.125038	0.027252	0.014896	0
-21.6021	45.6037	-6.43527	0.016037	57.8267	-0.152136	0.027158	0.01719	0
-7.93321	36.2044	-19.2433	0.008521	56.9283	-0.05304	-0.035376	0.01326	0
-4.80716	23.9841	-18.9531	0.009535	48.516	-0.039013	-0.05208	0.019222	0
-4.78062	31.2391	-20.5373	0.0113	47.2786	-0.036804	-0.024676	0.009571	0
-32.1708	28.5375	9.16786	0.015349	67.3945	-0.097576	0.026459	-0.043527	0
-23.8042	40.4908	12.7396	0.01567	36.5807	-0.068018	0.004749	0.002663	0
-32.6644	39.5005	14.1987	0.015181	47.6785	-0.096734	0.018966	-0.032238	0
0.075379	54.9782	3.70517	0.007794	33.3729	-0.049399	0.053041	-0.030337	0
3.83178	19.0506	-2.5942	0.019694	83.8575	-0.035091	0.021866	-0.005195	0
4.80127	26.6396	-1.20219	0.017389	83.1282	-0.058847	0.015623	0.004752	0
-13.1761	51.4175	8.45622	0.012957	44.538	-0.092235	0.062982	-0.001298	0
-14.9713	52.0002	9.06897	0.013311	37.4406	-0.070072	0.076997	-0.019823	0
-18.1245	57.3857	1.1768	0.010443	36.5415	-0.094952	0.090156	-0.028	0
-12.7442	41.1034	5.3393	0.019233	53.7633	-0.106533	0.092275	-0.044225	0
-8.49853	11.9373	0.606718	0.339808	79.9118	-0.0955264	0.0272181	-0.0233171	0
-4.55944	14.9468	0.849988	0.339808	68.7844	-0.157931	0.0272181	-0.053442	0
-16.3312	45.0802	9.73281	0.015274	53.0652	0.010169	0.02626	-0.009627	0
-37.6644	49.1124	1.1768	0.012623	52.8225	-0.011609	0.104203	-0.095302	0
-18.018	51.1589	20.4874	0.012645	55.9541	-0.036763	0.052726	-0.019386	0
-12.4052	41.4731	7.54317	0.026767	68.183	-0.118558	0.065853	-0.024872	0
-9.60549	39.4784	3.57444	0.031693	62.6201	-0.167533	0.090635	-0.034903	0
-11.1959	32.3806	2.05232	0.030921	71.0587	-0.137096	0.08048	-0.047124	0
-13.494	33.8151	-17.7042	0.01501	49.8089	-0.068856	0.025006	0.010444	0
-14.1062	34.7127	-15.2922	0.015565	53.0045	-0.067155	0.03554	0.004369	0
1.38142	11.3455	1.1768	0.339808	84.7411	-0.0955264	-0.000262	-0.061942	0
-12.2543	43.292	-7.79077	0.02518	63.0371	-0.18403	-0.030753	0.012632	0
-5.54198	52.8733	-13.0285	0.019169	59.0029	-0.124498	0.011207	-0.011736	0
-13.9391	48.9072	1.1768	0.012084	30.0168	-0.092114	0.01795	-0.030194	0
-14.4928	20.2204	1.1768	0.020429	88.5399	-0.136139	0.000505	-0.004603	0
-17.8552	22.365	1.1768	0.019151	78.7291	-0.056392	0.001306	0.027881	0
-20.5159	43.2107	-18.0631	0.017879	65.7603	-0.063957	0.03701	-0.046011	1
-20.3973	52.8043	-23.9276	0.016428	43.0705	-0.098612	0.046027	-0.050307	1
-21.2334	50.3891	-16.162	0.014494	39.7592	-0.087333	0.045141	-0.035805	1
0.102274	48.3647	-12.4134	0.008044	60.9249	-0.121386	0.02013	0.000681	0
-0.770373	42.1267	-15.5336	0.013232	48.71	-0.017111	0.021489	-0.022441	0
-12.9142	33.3707	-9.51515	0.014936	72.193	-0.009904	0.049773	-0.025785	0
-13.6259	47.1367	5.80553	0.019887	49.3629	-0.11321	0.036688	0.015138	0
-13.4414	46.3287	6.25425	0.019225	45.4382	-0.10946	0.005175	0.038979	0
-12.4885	39.0865	9.15884	0.022297	45.0556	-0.017342	0.003302	0.022069	0
-5.13788	35.9906	23.7847	0.018157	64.8729	-0.03875	0.068043	-0.049552	0
-0.497829	42.3383	24.2961	0.019555	42.89	-0.013615	0.064839	-0.032088	0
0.583547	43.8308	23.2782	0.001322	29.6484	-0.118534	0.136103	-0.033914	0
-16.6669	57.1667	-3.34704	0.010421	30.2255	-0.066834	0.032321	-0.035695	0
-15.0656	38.3957	-3.29907	0.015709	62.3738	-0.067079	0.015206	-0.032801	0
-11.7617	24.7912	-7.4227	0.023723	78.3588	-0.086478	0.001387	-0.025051	0
-42.1259	31.3605	-2.69271	0.010213	51.5911	-0.071555	-0.021731	0.016264	0
-10.8734	36.1086	16.9774	0.013968	55.3371	-0.027056	0.099333	-0.040859	0
-6.12073	22.3858	16.2218	0.021241	72.6861	-0.054243	0.06572	-0.014374	0
-10.7975	32.7396	17.7932	0.013343	61.2859	-0.054856	0.071851	-0.008704	0
-38.7615	28.8698	8.45289	0.016995	58.7822	-0.110706	-0.035617	0.026272	0
-35.2867	33.7369	4.17564	0.020189	54.2559	-0.089198	-0.009395	0.005954	0
-34.1497	43.7027	5.0303	0.017704	50.4969	-0.171623	-0.015434	-0.004699	0
-24.2997	36.6938	4.7061	0.013117	37.4889	-0.069771	-0.017979	0.017227	0
-20.1901	43.7837	4.84389	0.012074	56.0063	-0.126961	-0.013449	0.006614	0
-21.9014	32.6282	0.817848	0.012713	63.6979	-0.070689	-0.009056	0.014899	0
-1.73608	37.2312	-1.07059	0.000349	55.516	-0.123482	0.011123	-0.066248	0
-34.5644	39.4024	1.1768	0.016891	47.464	0.017916	-0.001286	0.020895	0
-36.6048	45.7339	1.1768	0.016229	51.0116	-0.047202	-0.026388	0.009286	0
-32.8928	14.3758	1.1768	0.027202	97.3937	-0.166744	-0.044429	-0.005768	0
8.29855	17.4267	-3.34569	0.033666	70.5401	-0.16163	0.090527	-0.008236	0
11.377	20.882	-2.97292	0.030791	72.0628	-0.168095	0.029701	0.007376	0
4.92288	22.4818	-1.961	0.035244	62.6064	-0.050401	0.088745	-0.030737	0
-24.0112	46.0634	6.18289	0.017652	43.8648	-0.213141	0.047576	-0.03567	0
-9.43189	6.76928	1.1768	0.019766	67.8144	-0.174108	0.047311	-0.033574	0
-25.5788	41.8129	3.11661	0.02188	36.0066	-0.135075	0.047046	-0.031478	0
-32.9575	38.842	4.99211	0.012365	63.654	-0.095209	0.02032	-0.005823	0
-36.5149	43.4241	0.036922	0.007466	59.0745	-0.156971	0.000463	-0.018509	0
-37.278	39.1943	0.869265	0.013532	47.3264	-0.030975	0.028435	-0.031859	0
-52.9716	28.2052	2.59906	0.013177	70.1087	-0.033528	0.025661	0.001598	0
-24.2457	19.4049	10.3887	0.013789	46.8195	-0.048831	-0.069265	0.018442	0
-25.6728	19.1706	9.86945	0.010864	57.4715	-0.044592	-0.074419	0.018117	0
-31.9335	48.0547	10.4799	0.012665	31.2298	-0.112519	0.017909	-0.034639	0
-30.3825	50.8829	16.227	0.015579	21.9114	-0.134497	0.017047	-0.027144	0
-35.8954	18.5134	-4.52222	0.022078	80.1783	-0.160238	0.018112	-0.038611	0
11.0543	39.5174	7.81425	0.015958	57.781	-0.076748	0.06967	-0.044127	0
6.10856	47.1679	18.3556	0.018311	65.7876	-0.108593	0.055987	-0.021492	0
-37.1099	23.0318	4.40146	0.039127	73.8349	-0.0955264	-0.029938	-0.070997	0
-33.724	13.484	-2.44627	0.339808	79.6344	-0.0955264	-0.097777	-0.04527	0
-14.486	36.5183	1.1768	0.005841	70.3813	0.061042	-0.024908	0.067199	0
27.5294	52.9575	-2.15832	0.0158895	62.191	0.0308705	-0.01724	0.0273585	0
-19.2982	51.6662	-4.70851	0.025938	36.0946	0.000699	-0.009572	-0.012482	0
-17.8522	51.8424	-1.7734	0.339808	33.424	-0.021448	-0.066558	0.014543	0
-26.85	28.0909	-13.1904	0.016241	58.6798	-0.051456	0.016017	0.005821	1
-32.061	23.9769	-15.9427	0.016724	64.1595	-0.052102	0.021171	0.01481	1
2.53914	40.424	-4.52176	0.015659	49.6085	-0.062831	0.022901	-0.021157	0
5.90369	41.2366	-3.75212	0.015073	42.7743	-0.048846	0.072958	-0.005608	0
3.09076	54.234	-5.77502	0.015308	65.5285	-0.147534	-0.074695	-0.017375	0
29.4868	15.9844	1.1768	0.339808	99.2127	-0.147831	-0.0269805	-0.018569	0
10.7255	45.0709	7.89959	0.016043	41.377	-0.148127	0.020734	-0.019763	0
23.1047	1.36177	17.8871	0.017753	65.5193	-0.118418	0.029358	-0.020807	0
9.91817	40.4871	6.38046	0.019463	33.6484	-0.088709	0.037982	-0.021851	0
-4.75052	55.336	-14.3226	0.017597	54.9747	-0.214548	-0.051147	0.022869	0
-5.4585	48.3559	-3.40423	0.018795	54.8141	-0.25505	0.008264	-0.019878	0
-8.25413	39.2786	-13.7938	0.023156	76.4593	-0.084686	-0.019397	0.033498	0
-17.1835	33.8305	6.8407	0.031935	61.9186	-0.176345	0.115017	-0.054141	0
-18.643	40.9481	12.0247	0.028304	59.0448	-0.143233	0.134466	-0.042014	0
-10.6108	35.2364	16.5673	0.0136306	54.0005	-0.023146	0.084572	-0.0371574	0
-30.1586	40.3386	6.55157	0.021099	53.4724	-0.057378	0.128052	-0.05541	0
-30.1915	35.4126	7.67808	0.019662	59.3153	-0.106337	0.087889	-0.010026	0
-3.31042	47.543	-10.2308	0.007205	26.8591	-0.110892	0.013752	0.006628	0
-5.36959	54.7135	-13.1672	0.004052	26.9293	-0.195722	-0.040041	0.03848	0
-3.38377	33.4446	19.0164	0.024445	18.6062	0.041181	0.027889	0.002525	0
-4.06186	31.2368	16.229	0.024442	13.0043	0.0209	0.022424	-0.004238	0
3.73028	42.7338	18.0083	0.028576	4.13741	0.059523	0.064231	-0.022111	0
-25.3977	46.4586	18.0781	0.014103	46.0266	-0.158427	0.020502	-0.051047	0
-20.7535	36.8815	12.1204	0.016923	34.6557	-0.083969	-0.006498	0.00161	0
-36.0707	35.3016	14.4318	0.011475	60.6902	-0.059775	0.026039	-0.020672	0

## Sheet: RIGHT direction
R-ankle-angle(Y)	R-ankle-moment(Y)	R- knee angle(X)	R-knee moment(X)	Injury Label 1=YES，0=NO
48.1972	0.010399	-50.1732	-0.117284	1
52.0575	0.011078	-47.8645	-0.113132	1
1.39037	0.001451	-99.7108	0.001847	1
64.4644	0.012725	-62.62	-0.131979	0
66.9376	0.013199	-57.3731	-0.080863	0
44.4339	0.001221	-36.5634	-0.075341	0
-43.4232	0.012022	-55.0968	-0.035945	0
	0.012749	-56.6494	-0.040614	0
	0.026455	-57.7389	-0.190765	0
	-1.52905	-59.523	-0.522302	0
	-1.43722	-42.772	-0.335191	0
	-1.83928	-32.9128	-1.0389	0
	-1.53775	-63.6431	-0.624228	0
	-1.59607	-29.0958	-0.702295	0
36.1759	0.019679	-61.8549	-0.12061	1
32.6824	0.020449	-56.1155	-0.085405	1
-20.1542	-0.0100263	-51.8005	-0.0456408	1
-10.5591	-0.012278	179.954	0.010258	0
57.2927	0.027877	-138.674	0.007232	0
-34.976	-0.012153	130.861	0.018355	0
38.7914	0.013163	-46.7656	-0.102144	0
2.65576	0.012185	-49.1493	-0.128248	0
2.93304	0.015613	-45.0586	-0.117043	0
20.9892	0.005747	-45.7173	-0.172082	0
18.4247	0.013181	-50.2024	-0.058271	0
13.6375	0.01078	-55.2875	-0.223705	0
41.8928	0.011124	-46.8776	-0.120492	1
42.5806	0.41247	-57.495	2.22392	1
31.8641	0.012109	-60.1213	-0.129882	1
32.3416	0.00692	-51.0207	-0.142157	0
32.7407	0.007064	-50.4601	-0.128985	0
32.4262	0.009044	-35.1553	-0.090984	0
27.4169	0.009644	-37.2884	-0.136148	0
21.2831	0.006333	-48.2983	-0.122727	0
24.5317	0.0104	-50.9364	-0.074083	0
32.4891	0.958253	-60.9959	1.25858	0
37.0112	0.913809	-42.0052	1.25525	0
33.4344	0.007282	-20.3897	-0.069848	0
26.467	0.007801	-33.135	-0.003371	0
32.8974	0.006511	-60.0703	-0.141682	0
31.699	0.019549	-47.2993	0.228378	0
31.9238	0.009988	-43.4587	-0.23952	0
74.9212	0.027917	-56.9836	-0.093063	1
21.2852	0.015888	4.56657	-0.033392	1
73.0856	0.018046	-45.8056	-0.030765	1
31.5188	0.014893	-35.0788	-0.075632	0
34.9284	0.017891	-29.7262	-0.10961	0
33.2367	0.011692	-27.8033	-0.051643	0
-17.3497	-0.01059	-28.9011	0.029969	0
34.9284		-29.7262	-0.10961	0
29.0508	0.01109	-37.9028	-0.128191	0
31.6887	0.456685	-53.5327	2.60548	1
31.838	0.621147	-56.4188	2.73197	1
15.188	0.011216	-36.083	-0.122974	0
49.0664	0.004261	-38.2322	-0.34163	0
16.7324	0.006154	-43.5277	-0.161097	0
	0.018789	-67.5205	-0.357463	0
	0.01759	-61.3363	-0.11406	0
	0.018083	-65.7168	-0.313176	0
44.4159	0.013814	-67.6581	-0.027799	0
36.842	0.011582	-54.034	-0.129015	0
	0.011744	-68.2599	-0.082597	0
38.1588	0.01593	-59.3058	-0.070334	0
25.5609	0.007967	-56.4115	-0.123152	0
-29.1776	-0.022926	-51.4255	-0.103256	0
6.33602	0.005901	-44.5797	-0.122125	0
-1.52192	0.006348	-35.2053	-0.06933	0
3.12774	0.008938	-42.2423	-0.098551	0
-3.37237	0.011526	-65.829	-0.11159	0
-1.46717	0.011367	-58.4129	-0.107109	0
-1.87665	-0.000123	10.168	0.029396	0
22.3029	0.008607	-48.0503	-0.057379	0
	0.008046	-50.5	-0.03127	0
	0.010064	-38.1642	-0.032925	0
20.2535	0.005671	-49.3955	-0.084552	0
21.4946	0.005854	-50.02	-0.082491	0
23.7097	0.006505	-62.3783	-0.094393	0
52.6844	-0.009625	-68.1282	-0.997021	0
50.0113	0.020232	-55.831	-0.082357	0
45.3491	0.018008	-61.6801	-0.097376	0
35.9516	0.009222	-65.864	-0.064614	1
33.4002	0.704544	-49.4404	2.07545	1
26.7699	0.00903	-50.849	-0.099653	1
14.3756	1.26409	-37.3695	0.787441	0
9.6445	0.004346	-47.8021	-0.223522	0
19.4015	0.007471	-39.5182	-0.207475	0
31.0901	0.01559	-60.8379	-0.177081	0
32.7208	0.017336	-56.7223	-0.148806	0
32.0386	0.016474	-55.2373	-0.117556	0
29.8159	0.010252	-38.3022	-0.079074	0
21.6773	2.17841	-31.7675	3.61663	0
17.7905	0.008035	-29.0519	0.055043	0
	0.007013	-51.7171	1.68378	0
	0.006559	-42.7818	-0.053805	0
	0.006254	-47.5283	-0.06287	0
37.643	0.013824	-55.7609	-0.171793	0
42.7408	0.003902	-53.836	-0.177154	0
36.6407	0.008679	-35.8293	-0.153937	0
35.8228	0.004806	-41.2249	-0.187216	0
27.3811	0.00789	-26.5617	0.024827	1
19.1528	0.016756	-27.9682	-0.179503	1
27.5653	0.0075	-31.5955	-0.03501	1
	0.010534	-60.1864	-0.09861	0
	0.010418	-54.2701	-0.066897	0
-25.3718	0.009876	-48.1152	-0.141501	0
	0.015863	-53.7191	-0.276894	0
	0.011596	-54.518	-0.204567	0
5.65082	0.012191	-60.0371	-0.013878	0
6.71668	0.002432	-57.0173	-0.148938	0
-3.02163	0.004363	-70.9785	-0.069367	0
8.37322	0.416089	-35.4987	0.532897	0
15.8153	0.579018	-38.344	0.390146	0
9.8135	0.50655	-30.0099	-0.078536	0
1.23262	0.014873	-48.5703	-0.087906	0
-3.02389	0.010633	-47.4095	-0.093447	0
-6.50856	0.010701	-53.1113	-0.24877	0
3.78823	0.003093	-48.5182	-0.085951	0
6.64021	0.005105	-35.7843	-0.090203	0
5.52984	0.002341	-47.5137	-0.085798	0
-2.06335	1.07396	-35.0985	0.330191	0
-5.28132	0.006272	-45.7179	-0.234073	0
-7.66791	0.009936	-37.3737	-0.228561	0
-18.5715	0.007082	-54.204	-0.173442	0
-14.8335	0.006638	-49.9292	-0.068747	0
-11.9825	0.008865	-49.9563	-0.082568	0
-4.05395	0.004576	-40.2826	-0.075921	0
-2.35346	0.003782	-38.8431	-0.07764	0
-2.99691	0.003373	-43.9082	-0.088984	0
8.87252	0.014816	-58.1488	-0.352337	0
6.36181	0.0125	-51.7364	-0.135767	0
7.89197	0.011853	-56.4025	-0.333191	0
-4.92973	0.778277	-51.8077	1.17905	1
-1.02896	0.004043	-52.7518	-0.147633	1
-2.02265	0.011505	-49.9802	-0.050565	1
-2.76686	0.008623	-32.3742	-0.071922	0
-2.79202	1.3725	-27.0656	0.786423	0
				0
-2.03143	0.023118	-25.9059	-0.032921	0
-1.75608	0.028326	-30.11	-0.073025	0
-2.61115	0.017031	-28.7849	-0.044342	0
-6.16146	0.004437	-35.0384	-0.138284	0
-2.06656	0.008395	-16.6641	-0.103632	0
3.88799	0.022131	-50.8519	0.250159	1
0.538312	0.018151	51.6353	-0.05989	1
2.87301	0.061452	-56.359	-0.261458	1
15.3218	0.005849	-61.1796	-0.097443	0
12.5139	0.006081	-61.1218	-0.073981	0
13.5744	0.005927	-52.4421	-0.079751	0
-30.3565	2.23173	-28.8684	2.81344	0
-33.757	0.004292	-25.8447	0.020133	0
-34.5645	0.006155	-34.6281	-0.094456	0
-17.6281	0.006112	-11.069	-0.06364	0
-17.081	0.004311	-18.2704	-0.095438	0
-18.0386	0.006509	-13.2255	-0.104731	0
-27.0106	-0.061325	-66.5319	0.204129	0
28.1831	-1.70588	-48.7804	-0.609622	0
28.3961	-1.68126	-52.9561	-0.726459	0
8.74113	0.016276	-55.0038	-0.116337	0
10.4191	0.017272	-59.4301	-0.127263	0
7.21411	0.014547	-56.1584	-0.12035	0
-12.5808	0.012149	-26.7276	-0.047472	0
-11.3446	0.015325	-33.4229	-0.101402	0
-10.1851	0.009863	-36.4914	-0.11571	0
6.24546	0.016904	-49.5479	-0.14621	0
-20.6897	0.008256	-48.4967	-0.072236	0
-15.7674	0.012126	-46.0998	-0.045935	0
-21.9858	0.008658	-54.0292	-0.112495	0
12.0343	0.0154	-55.4688	-0.27238	0
10.3813	0.017276	-52.793	-0.203448	0
14.2215	0.011396	-54.8447	-0.12623	0
3.7272	0.007372	-46.3363	-0.090749	0
5.01681	0.00689	-48.6567	-0.110722	0
4.03988	0.006938	-47.2868	-0.096674	0
14.1954	0.015102	-38.2133	-0.027286	0
3.74236	0.029511	-42.1589	-0.10043	0
-40.0942	0.001085	-36.9162	0.036945	0
-55.9563	0.003037	-45.0721	-0.288444	0
-22.7738	-0.008737	-58.6195	-0.124692	0
-21.0001	0.008419	-21.395	0.005048	0
-21.487	0.008734	-22.0648	0.00492	0
-36.2056	0.019497	-27.4254	-0.071414	0
-9.58744	0.005428	-16.4168	-0.046601	0
-13.6122	0.007672	-42.6403	-0.052576	0
-4.86728	0.007112	-39.1458	-0.0742	0
4.30434	0.004169	-46.8835	-0.10347	0
4.99066	0.005775	-31.8724	-0.072947	0
5.79558	0.005338	-31.3575	-0.07389	0
5.03336	0.005228	-42.4062	-0.196294	0
1.66363	1.44626	-39.4976	0.474147	0
-1.6559	1.04134	-50.4262	1.54407	0
-4.62135	0.009004	-41.3654	-0.108912	0
-12.0662	0.682703	-30.534	0.19037	0
-5.67229	0.011994	-41.7885	-0.102573	0
-1.02242	0.012696	-34.972	-0.06794	0
13.9122	-0.005751	-62.7175	-0.119118	0
8.89921	-0.004158	-57.0584	-0.107963	0
12.7249	-0.005221	-58.6782	-0.078449	0
1.65489	0.012271	-41.1184	-0.062976	0
2.23761	0.011613	-49.301	-0.099145	0
24.6502	0.01291	-37.9529	-0.393034	0
23.5294	-0.004439	-50.8107	-0.20443	0
22.4317	-0.003033	-44.3874	-0.171835	0
-6.49857	0.010882	-45.1249	-0.000926	0
-10.5161	0.013461	-47.4929	-0.009112	0
4.08294	0.006987	-37.6628	0.015491	0
-6.33807	0.008258	-52.4134	-0.080548	1
-4.30222	0.01191	-55.0676	-0.067558	1
-4.85344	0.010091	-56.6709	-0.080025	1
-8.55172	0.006125	-42.513	-0.039476	0
3.40437	0.0064	-46.4206	-0.036388	0
-9.50271	0.004025	-52.3689	-0.049129	0
0.06227	0.004047	-60.1611	-0.161632	0
-1.2249	-0.000207	-43.3073	-0.105192	0
0.613118	0.002486	-47.3583	-0.144873	0
-8.33966	0.004984	-25.0645	-0.151223	0
-6.69757	0.010852	-35.9127	-0.087806	0
-5.10225	0.001101	-20.9408	-0.144932	0
36.7871	0.008218	-34.5346	-0.099764	0
35.6934	0.000273	-49.3164	-0.23452	0
36.9946	0.006023	-50.864	-0.158778	0
15.7175	0.004056	-45.3945	-0.05928	0
22.6785	0.005964	-50.9294	-0.065071	0
4.97279	0.004645	-43.8981	-0.092414	0
2.27064	0.003808	-48.9439	-0.05887	0
2.61441	0.00512	-44.6758	-0.086147	0
	0.012363	-63.0709	-0.092947	0
	0.013888	-54.2084	-0.103016	0
	0.013051	-63.6535	-0.1406	0
32.9807	0.009005	-25.1987	0.009894	0
23.5434		-34.9417		0
48.6836	0.011228	-46.8952	-0.105628	0
43.5191	0.010955	-46.6235	-0.088139	0
46.2266	0.010733	-47.9016	-0.120897	0
17.6274	0.019049	0.016497	0.018444	0
7.18407	0.023469	2.70352	0.09063	0
17.048	0.017506	-38.6077	0.088762	0
6.28787	0.004618	-27.1817	-0.074906	0
34.811	0.896284	-53.768	3.58707	0
27.5751	1.03024	-46.2698	2.05404	0
34.8946	0.622897	-49.4287	2.22804	0
29.415	0.870729	-54.6656	1.72387	0
34.3051	0.003683	-54.8201	-0.135699	0
32.4423	0.010419	-52.4684	-0.053279	0
				0
	0.00926907	-51.3924	-0.039304	0
	0.00584695	-58.0699	-0.063743	0
	0.013242	-61.4273	-0.123582	0
	0.013711	-55.4927	-0.059127	0
	0.011868	-63.0085	-0.057536	0
-7.22849	0.017833	-56.463	-0.066496	0
72.6295	0.0233	-47.9496	-0.03521	0
56.0117	0.014356	-38.1968	0.00298	0
59.1984	-0.018457	-91.8028	-0.378685	0
52.7344	0.020828	-65.1892	-0.111594	0
52.8422	0.018105	-70.2439	-0.095852	0
29.1178	0.0184	-55.1952	-0.125528	0
				0
29.0508	0.01109	-37.9028	-0.128191	0
32.4169	0.012919	-46.1301	-0.064974	1
38.2315	0.013495	-59.3713	-0.047781	1
29.1714	0.009557	-56.9659	-0.097237	1
-11.5303	0.003244	-26.7687	-0.165223	0
-12.7056	0.010813	-38.9321	-0.06512	0
-13.5474	0.009809	-31.8259	-0.118413	0
14.1304	0.009532	-70.5934	-0.119488	0
7.66448	0.01036	-58.589	-0.319365	0
11.5964	0.740485	-35.8104	0.767402	0
12.0709	0.812592	-30.7763	0.081201	0
-8.75611	0.01361	-21.6331	0.093292	0
-5.08327	0.278666	-30.5673	1.28754	0
13.7603	0.011691	-50.1597	-0.121865	0
10.0901	0.024961	-52.1644	-0.274233	0
15.8206	0.010002	-49.8416	-0.139986	0
	0.008914	-45.574	-0.13697	0
3.71494	0.005181	-49.7401	-0.054	0
	0.011327	-45.7677	-0.128123	0
-14.4694	0.008732	-49.4042	-0.06561	0
-18.6198	0.008639	-47.556	-0.081514	0
-19.7262	0.007789	-56.4577	-0.14931	0
-39.0106	0.005237	-22.5919	0.04193	0
-40.1889	0.003494	-28.8012	-0.04383	0
-14.5473	0.758859	-36.4469	0.642762	0
-15.6045	0.752441	-56.1722	0.788784	0
